# Supplementary material for: Could changing invitation and booking processes help women translate their cervical screening intentions into action? A population-based survey of women’s preferences in Great Britain
Source: PubMed Central journal article supplement (PMC6629419; doi:10.1136/bmjopen-2018-028134), 2019-07-11
Supplement: bmjopen-2018-028134.draft_revisions.pdf [file bmjopen-2018-028134.draft_revisions.pdf]

# BMJ Open

BMJ Open is committed to open peer review. As part of this commitment we make the peer review history of every article we publish publicly available.

When an article is published we post the peer reviewers' comments and the authors' responses online. We also post the versions of the paper that were used during peer review. These are the versions that the peer review comments apply to.

The versions of the paper that follow are the versions that were submitted during the peer review process. They are not the versions of record or the final published versions. They should not be cited or distributed as the published version of this manuscript.

BMJ Open is an open access journal and the full, final, typeset and author-corrected version of record of the manuscript is available on our site with no access controls, subscription charges or pay-per-view fees (<http://bmjopen.bmj.com>).

If you have any questions on BMJ Open's open peer review process please email [info.bmjopen@bmj.com](mailto:info.bmjopen@bmj.com)

# BMJ Open

## Could changing invitation and booking processes help women translate their cervical screening intentions into action: a population-based survey of women's preferences

|                               |                                                                                                                                                                                                                            |
|-------------------------------|----------------------------------------------------------------------------------------------------------------------------------------------------------------------------------------------------------------------------|
| Journal:                      | <i>BMJ Open</i>                                                                                                                                                                                                            |
| Manuscript ID                 | bmjopen-2018-028134                                                                                                                                                                                                        |
| Article Type:                 | Research                                                                                                                                                                                                                   |
| Date Submitted by the Author: | 23-Nov-2018                                                                                                                                                                                                                |
| Complete List of Authors:     | Ryan, Mairead; University College London Institute of Epidemiology and Health Care, Department of Behavioural Science and Health; Waller, Jo; UCL, Epidemiology and Public Health Marlow, Laura; University College London |
| Keywords:                     | cervical cancer screening, non-participants, interventions, age, screening status, uptake                                                                                                                                  |
|                               |                                                                                                                                                                                                                            |

SCHOLARONE™  
Manuscripts

1  
2  
3 Could changing invitation and booking processes help women translate their cervical screening  
4 intentions into action: a population-based survey of women's preferences  
5  
6  
7

8 Mairead Ryan, MSc

9 Jo Waller, PhD

10  
11 Laura A.V Marlow, PhD  
12  
13  
14  
15

16 Cancer Communication and Screening Group, Research Department of Behavioural Science and  
17 Health, University College London, Gower Street, London, UK  
18

19  
20 Corresponding author contact details: Laura Marlow, l.marlow@ucl.ac.uk, 020 7679 1798.  
21  
22

23  
24  
25 MR, JW and LM are supported by a Cancer Research UK Career Development Fellowship awarded to  
26 JW (C7492/A17219).  
27  
28  
29  
30  
31  
32  
33  
34  
35  
36  
37  
38  
39  
40  
41  
42  
43  
44  
45  
46  
47  
48  
49  
50  
51  
52  
53  
54  
55  
56  
57  
58  
59  
60

## Abstract

**Objectives:** Many women who do not attend screening intend to go, but do not get around to booking an appointment. Qualitative work suggests these 'intenders' face more practical barriers to screening than women who are up-to-date ('maintainers'). This study explored practical barriers to booking a screening appointment and preferences for alternative invitation and booking methods that might overcome these barriers.

**Design:** A cross-sectional survey was employed.

**Setting:** Great Britain

**Participants:** Women aged 25 to 64, living in Great Britain who intended to be screened but were overdue ('intenders', n=255) and women who were up-to-date with screening ('maintainers', n=359)

**Results:** 'Intenders' reported slightly more barriers than 'maintainers' overall (mean = 1.36 vs 1.06,  $t=3.03$ ,  $p<0.01$ ) and were more likely to think they might forget to book an appointment (Odds ratio=2.87, 95% confidence interval: 2.01-4.09). Over half of women said they would book on a website using a smartphone (62%) or a computer (58%). Older women and women from lower social grades were less likely to say they would use online booking methods (all  $ps<.05$ ). Women who reported two or more barriers were more likely to say they would use online booking than women who reported none ( $ps<.01$ ).

**Conclusions:** Women who are overdue for screening face practical barriers to booking appointments. Tailoring the appointment booking process to the preferences cited in this study may help women overcome logistical barriers to participation and increase coverage for cervical screening.

### Strengths and limitations of this study

- Booking preferences were assessed in women who are up-to-date and overdue for cervical screening

- The invitation and booking process was broken down into its component parts to identify barriers at each stage of the process as well as options which may help women to overcome these barriers
- The practical barriers explored within this study were not exhaustive of all barriers faced by women

## Introduction

Cervical screening programmes are designed to reduce the incidence and mortality rate of cervical cancer.<sup>1</sup> In Great Britain all eligible women aged 25 to 64 registered with a GP are invited to be screened for the presence of abnormal cell changes in the cervix, which could, if undetected and untreated, develop into cervical cancer. The efficacy of the programme has been widely acknowledged,<sup>2</sup> however the success of any screening programme is dependent on good coverage. In 2017, coverage (i.e. the percentage of eligible women recorded as adequately screened) was 72%, well below the national target of 80% and in keeping with a trend of decreasing screening coverage.

Reasons for screening non-attendance are complex and differ depending on socio-demographic factors such as age, socio-economic status and marital status.<sup>3-6</sup> Emotional barriers including embarrassment, fear of pain and negative experiences are often reported, particularly in qualitative studies.<sup>7-9</sup> While these barriers undoubtedly need to be addressed, practical barriers have been found to be more predictive of screening status than emotional barriers.<sup>10</sup> Recent research showed that over half of women overdue for cervical screening have positive intentions to attend.<sup>11</sup> While this is encouraging, intentions are frequently not translated into action.<sup>12, 13</sup>

Weinstein used a 'messy desk' analogy to help explain the problem of translating intentions into action.<sup>14</sup> He proposed that we do not carry out errands in a logical sequence, but rather in a haphazard manner, acting on 'to-do' list items when we feel pressure, when items need to be actioned quickly, when prompted or because of personal preference. More recently, Sheeran and Webb identified three key problems (or 'TRIALS') people might encounter when trying to realise their intentions; i) they fail to get started (e.g. forget to act or miss an opportunity to act), ii) they fail to keep the goal on track (fail to monitor the goal, face competing thoughts or distractions) and iii) they fail to close (don't quite meet the goal).<sup>15</sup>

Women receive a posted letter inviting them to book a screening appointment. The letter states the recipient "can make an appointment for cervical screening by phoning (*their*) GP surgery". GP surgery hours generally coincide with 'normal' working hours, presenting several practical barriers

1  
2  
3 for women who are in full-time employment or who have caring responsibilities, both in terms of  
4 phoning and attending a GP surgery. Previous research has identified that many women find the  
5 booking process arduous and inflexible.<sup>3</sup>  
6  
7

8  
9 Few studies have assessed alternative methods of inviting women for cervical screening.<sup>16</sup> The most  
10 recent Cochrane review of interventions to improve uptake <sup>16</sup> reported two studies from the 1980s  
11 and 90s, which found that participants who received a telephone invitation were significantly more  
12 likely to attend than those who received a letter.<sup>17, 18</sup> Studies which have examined the utility of  
13 more recent technological developments to invite women are lacking.<sup>19</sup> There is also a paucity of  
14 literature concerning alternative booking methods for cervical screening, most likely due to limited  
15 booking options being available until recently. One trial investigated the efficacy of online booking  
16 among first time invitees.<sup>20</sup> The intervention group booked slightly more appointments within three  
17 months (2.18% higher than the control group) however, this was not statistically significant.<sup>20</sup> The  
18 authors noted that the way the online booking system was offered could account for the lack of  
19 support (in a letter participants were asked to visit a website to book at one of three sexual health  
20 clinics). Hence, other forms of online booking may be desirable to women.  
21  
22  
23  
24  
25  
26  
27  
28

29  
30 New technologies offer opportunities for editing the architecture of the invitation and booking  
31 system in ways that may help to overcome some of the challenges women face between forming a  
32 positive intention and translating this into behaviour. The present study explored practical barriers  
33 to booking an appointment among two groups: women who are up-to-date with screening  
34 ('maintainers') and women who intend to be screened but are currently overdue ('intenders'), the  
35 aim of which was to examine any between-group differences which may account for this intention-  
36 behaviour gap among 'intenders'. We also assessed invitation and booking preferences and explored  
37 whether these might help to overcome practical barriers.  
38  
39  
40  
41  
42

## 43 **Methods**

### 44 *Participants*

45  
46 Participants were recruited by Kantar TNS UK as part of their omnibus survey. The TNS omnibus  
47 survey recruits a new sample of 2000-4000 men and women living in Great Britain on a weekly basis  
48 and asks questions on a range of topics commissioned by external companies. Recruitment uses  
49 random location sampling to identify areas for sampling participants using the 2011 Census and the  
50 Postcode Address File. Recruiters visit homes in the identified areas and knock on doors asking those  
51 who answer to participate. All interviews were conducted in English. Quotas are set at each location  
52 for age, gender, working status, and presence of children in the household.  
53  
54  
55  
56  
57  
58  
59  
60

1  
2  
3 Women who were eligible for cervical screening and had not previously been diagnosed with  
4 cervical cancer, were asked to report their past attendance at cervical screening and future intention  
5 to attend (see Online Supplement 1). Responses to these questions were used to classify women as  
6  
7  
8 'intenders' (intended to be screened but were currently overdue), 'maintainers' (up-to-date with  
9 screening and intending to go in the future) or 'other' (never heard of screening, never been invited,  
10 decided not to be screened). A sample of 600 women was expected to allow us to establish a  
11 significant difference of 5% between preferred booking options in the two groups of attenders  
12 within +/- 8% with 95% confidence.  
13  
14  
15

### 16 17 *Procedure*

18  
19 Ethical approval was granted by University College London Research Ethics Committee (reference:  
20 10353/003). All questions were piloted with women eligible for screening ( $n=10$ ). Data were  
21 collected between April and May 2018. Face-to-face computer-assisted personal interviews were  
22 used to collect data. Kantar TNS provided anonymised data to UCL for analysis.  
23  
24  
25

### 26 27 *Measures*

28  
29 *Invitation preferences:* Participants were asked whether several different modes of communication  
30 were acceptable to them as a means of being invited to book a cervical screening appointment (see  
31 Online Supplement 1). Participants were considered to find a mode of communication 'acceptable' if  
32 they responded quite/very acceptable or 'unacceptable' if they responded quite/very unacceptable,  
33 neither unacceptable or acceptable, don't know or not applicable. Participants who responded  
34 quite/very unacceptable were asked to explain why (open response).  
35  
36  
37  
38

39  
40 *Practical barriers to booking an appointment:* Participants were asked to respond to a list of barriers,  
41 which were based on the key problems outlined in the TRIALS model.<sup>15</sup> Statements addressing the  
42 key problem of 'failing to get started' included 'It is easy for me to find time to read a letter like this'  
43 and 'I might forget to book an appointment after reading this letter'. Statements addressing 'failing  
44 to keep the goal on track' included 'It is difficult for me to call my GP practice during their opening  
45 hours' and 'I find it difficult to get through to a receptionist when I phone my GP practice'. Women  
46 were then asked to state which booking attributes were important to them, the aim of which was to  
47 address factors that might influence 'failure to close' (i.e. being able to book the appointment).  
48  
49  
50  
51  
52

53  
54 *Booking preferences:* Participants were asked to indicate how likely they would be to use different  
55 booking methods. Participants were considered 'likely to use' a method if they responded quite/very  
56 likely or 'not likely to use' if they responded quite/very unlikely, neither unlikely nor likely, don't  
57 know or not applicable. Participants were also asked to indicate which booking methods they had  
58 used in the past for any GP appointment.  
59  
60

1  
2  
3 *Socio-demographic and background factors:* Data regarding age, ethnicity, education level,  
4 employment status, marital status, social grade, child/carer responsibilities and smartphone  
5 ownership were also collected. Social grade is determined by the occupation of the Chief Income  
6 Earner in the household and is classified as follows: AB managerial/professional; C1 supervisory; C2  
7 skilled manual; D semi-skilled/unskilled manual; E casual workers/unemployed.<sup>21</sup>  
8  
9

### 10 11 12 *Patient and Public Involvement Statement*

13  
14 The study was supported by a PPI group who provided input into the contents of the survey. A group  
15 of 10 screening-eligible women were invited to guide and refine the survey questions. Women who  
16 were both up-to-date and overdue were represented in the group. The group helped to establish  
17 the perceived difficulty of the questions (e.g. unknown terms, ambiguous concepts, long and overly  
18 complex questions) and omissions from the survey. The questions and response options were  
19 tailored based on feedback provided by this PPI group.  
20  
21  
22  
23

### 24 25 *Analyses*

26  
27 All analyses were conducted using IBM SPSS version 22. Chi-squared analyses were conducted to  
28 test for significant differences in participant demographics between 'Intenders' and 'Maintainers'.  
29 Descriptive statistics were conducted to assess booking history and smartphone/mobile phone  
30 ownership across all participants. For each of the six practical barrier statements, any positively-  
31 framed items were reverse-scored so that a higher score was indicative of a barrier for all items.  
32 Total practical barrier scores were created by allocating a score of 1 for each barrier statement that  
33 a participant 'agreed' or 'strongly agreed' with and adding these together (possible range 0-6).  
34 Independent samples t-tests were conducted to assess differences in the mean barriers scores  
35 between 'intenders' and 'maintainers'. A series of binary logistic regressions were then conducted to  
36 assess the associations between endorsing each barrier/booking attribute and the unadjusted odds  
37 for being an 'intender' (versus a 'maintainer'). A series of univariable logistic regressions were  
38 conducted to explore whether socio-demographic factors, screening status and number of practical  
39 barriers reported were associated with invitation and booking preferences. Multivariable logistic  
40 regressions are presented as supplementary material.  
41  
42  
43  
44  
45  
46  
47  
48  
49  
50

## 51 **Results**

### 52 53 *Sample characteristics*

54  
55 Over four weeks of the survey, 2088 respondents were identified as being eligible for cervical  
56 screening and had not previously had cervical cancer. Of these, 1548 (74%) were up-to-date and 445  
57 (21%) were overdue for screening. Our questions on invitation and booking preferences for cervical  
58  
59  
60



1  
2  
3 screening were asked to all women who were classified as 'intenders' (n=255) and women who were  
4 classified as 'maintainers' (n=359) in the first week.

5  
6  
7 Sample characteristics for participants classified as 'intenders' (n=255) and 'maintainers' (n=359) are  
8 presented in Table 1. Mean age was 41.69 years (SD=10.84, range: 25-64 years), the majority self-  
9 identified as White (89%), were employed (64%), married or co-habiting (67%) and had regular  
10 caring responsibilities (i.e. for children /parents; 63%). 'Intenders' (mean=39.41; SD=9.94) were  
11 significantly younger than 'maintainers' (mean=43.31; SD=11.16);  $t(612)=4.47, p<.001$ .

12  
13  
14 The majority of women had previously booked by phoning the practice (89%), over one-third had  
15 booked in person (39%) and 14% had booked on a website. 'Maintainers' were significantly more  
16 likely to have previously booked on a website than 'intenders' (see Table 1). The majority of  
17 participants had a smartphone (87%), fewer women had a mobile phone which was not a  
18 smartphone (11%) and a small minority had no mobile phone (2%).

#### 19 20 21 *Practical barriers to appointment booking and desired attributes*

22  
23  
24 Over two-thirds of women reported one or more barriers to booking (69%); mean number of  
25 reported barriers was 1.21 (SD=1.06). 'Intenders' (mean=1.36; SD=1.06) reported slightly more  
26 barriers than 'maintainers' overall (mean=1.10; SD=1.04;  $t(612)=3.03, p <0.01$ ). The most commonly  
27 endorsed barriers and desired booking attributes are outlined in Table 2. The 'intenders' group were  
28 significantly more likely to endorse the statement 'I might forget to book an appointment after  
29 reading this letter' than 'maintainers'. 'Intenders' were also more likely to state 'How long it takes to  
30 book the appointment' was important to them than 'maintainers'.

#### 31 32 33 *Invitation preferences*

34  
35  
36 Posted letters emerged as the most acceptable invitation mode followed by text-message (see Table  
37 3). Socio-demographic predictors of the acceptability of each modality are shown in Table 3. Text-  
38 message, email and mobile call invitations were less acceptable to women aged 55-64; these  
39 associations remained significant in multivariable analyses (see Online Supplement 2). Mobile and  
40 landline call invites were more acceptable to women from lower socio-economic backgrounds and  
41 this remained significant in multivariable analyses for mobile invites. Reasons for considering  
42 invitation modes as unacceptable are provided in Online Supplement 3; fears about missing a phone  
43 call/email or text and privacy concerns were commonly cited. Many participants also reported they  
44 had no landline phone.

#### 45 46 47 *Phone-based booking preferences*

1  
2  
3 Most women said they were likely to book by phoning their GP practice (90%; see Table 4). Older  
4 women were significantly less likely to say they would call a 24-hour automated service than women  
5 aged 25-34 (41% vs 61%). Women with caring responsibilities were more likely to say they would  
6 request a call-back compared to women with no caring responsibilities (62% vs 49%). 'Maintainers'  
7 were less likely to say they would request a call-back than 'intenders' (63% vs 53%). These  
8 associations remained significant in multivariable analyses. Women who cited three or more barriers  
9 were more likely to say they would call a 24-hour automated service but this association was not  
10 significant in multivariable analyses.  
11  
12

### 13 *Online booking preferences*

14  
15  
16  
17  
18  
19 Booking on a website using a smartphone (62%) was the preferred online booking method (see  
20 Table 5). Older women (55-64 years) were less likely to say they would book online than younger  
21 women (25-34 years). Women in lower social grades were less likely than women in the highest  
22 grade to state they would book on a website, either using a desktop or smartphone. Participants  
23 who were studying or retired were less likely than those employed to say they would book online  
24 (either on a website using a smartphone: 41% vs 65%, or through an app: 24% vs 56%). Women who  
25 reported two or more barriers were more likely to report that they would use all online booking  
26 methods compared to women who reported no barriers (see Table 5). Age, social grade and number  
27 of barriers remained significant in multivariable analyses.  
28  
29  
30  
31  
32  
33

## 34 **Discussion**

35  
36  
37  
38  
39  
40 This study examined women's practical barriers to booking a cervical screening appointment and  
41 assessed whether invitation and booking preferences are associated with reported barriers, socio-  
42 demographic factors and screening status. Approximately one-third of all women reported that it is  
43 difficult to phone their GP practice within opening hours and half reported that it is difficult to get  
44 through to a receptionist. Although the survey found that 'intenders' experience slightly more  
45 practical barriers to screening than 'maintainers', endorsement of barriers across the sample  
46 suggests that both groups need more support in booking an appointment.  
47  
48  
49  
50  
51

52  
53 'Intenders' were more likely to report that they would forget to book an appointment after reading  
54 the screening letter than 'maintainers'. This key problem relates to a 'failure to get started', which is  
55 a first barrier people face between forming an intention and translating this into behaviour.<sup>15</sup>  
56  
57 Written reminders are an integral part of the screening programme and there is good evidence to  
58 show these improve uptake,<sup>16</sup> but in their current format these reminders do not seem to help all  
59  
60

1  
2  
3 women to remember to book their appointment. The use of text-message reminders has shown  
4 promise in other screening contexts.<sup>22</sup> 'Intenders' were also more likely to say that the length of  
5 time needed to book an appointment was important to them. Since all women eligible for cervical  
6 screening fall within the working age population, and GP opening hours generally overlap with  
7 working hours, it is likely this cohort face competing obligations,<sup>23</sup> and, as a result 'fail to keep their  
8 goal on track'.<sup>15</sup> The rate of female employment (16 to 64 years) has increased from 62.2% in 1994,  
9 when coverage was high (85%; five yearly coverage for women aged 20 to 64)<sup>24</sup> to 70.5% in 2017.<sup>25</sup>  
10 Alternative booking methods may provide more flexibility.  
11  
12  
13  
14  
15  
16  
17

18 Women who reported more barriers showed greater interest in using alternative booking methods.  
19 Specifically, participants who reported two or more barriers were more likely to say that they would  
20 book on a website or through an app. This is perhaps not surprising since these methods overcome  
21 the most common practical barriers highlighted by participants, including, difficulty getting through  
22 to a receptionist and difficulty calling the practice during opening hours. While online booking  
23 services are already set up in the majority of GP practices across England for GP appointments, a  
24 national survey found that over 40% of patients are currently unaware if there are online booking  
25 services at their GP practice.<sup>26</sup> Hence, signposting online booking services, if available for nurse  
26 appointments, to groups of the screening-eligible population (i.e. younger women who are more  
27 likely to be 'intenders') may be an effective means of increasing uptake. This survey suggests that  
28 there are likely to be age and socio-economic inequalities in the use of online bookings. For  
29 example, women aged 45-54 years and women age 55-64 showed less interest in using online  
30 booking methods. Thus, ensuring that traditional telephone booking options remains available is  
31 important.  
32  
33  
34  
35  
36  
37  
38  
39  
40  
41  
42

43 Previous research has found that it is very difficult for individuals to maintain intentions after even  
44 very brief periods of time (less than one minute), especially in circumstances where there are  
45 competing tasks.<sup>27</sup> Unlike posted letters, which may not be read until the end of the day, text-  
46 messages can be delivered at a time when GP practices are open, so women can act immediately on  
47 their intentions to book an appointment. Given that text-message invites were considered  
48 acceptable to the majority of women across all socio-demographic backgrounds, and have  
49 previously been found to be effective in increasing uptake for other national screening  
50 programmes,<sup>22</sup> the use of text-message invitations may be a worthwhile intervention to explore.  
51 Text-messages within the cervical screening programme have, thus far, been introduced as a  
52 booking reminder, rather than as a stand-alone invitation, which the current study did not specify.  
53  
54  
55  
56  
57  
58  
59  
60

1  
2  
3 Some participants shared concerns that they may miss the message; outlining that text-messages  
4 would be used as a supplemental invitation may have further increased acceptability within the  
5 sample. Further research is needed to explore methods of overcoming privacy concerns associated  
6 with text-messages, which some of the participants raised.  
7  
8  
9

10  
11 This study had some limitations. We were unable to collect data on women who elected not to  
12 participate in the study. Hence the response rate and differences between respondents and non-  
13 respondents could not be determined. This survey was also conducted in English and therefore non-  
14 English speakers were not represented. Given ethnic disparities in screening attendance in  
15 England,<sup>28</sup> more work is needed to explore methods of overcoming practical barriers to screening for  
16 ethnic minority women. Furthermore, although this study explored practical barriers to  
17 appointment-booking based on the TRIALS model,<sup>15</sup> several other practical barriers were not  
18 assessed. For example, previous research has found that 'intenders' are more likely to have children  
19 under the age of five;<sup>11</sup> childcare may be an additional practical barrier to screening. Thus the  
20 barriers cited in this study are not exhaustive of all practical barriers to screening for women.  
21  
22  
23  
24  
25  
26  
27  
28  
29

30 Nevertheless, this was the first study to assess preferences for booking a screening appointment in  
31 Great Britain. The invitation and booking process was broken down to identify barriers at each stage  
32 and associated preferences which may help women to overcome such barriers. The lack of  
33 differences by screening status negates any concerns that changing the architecture might deter  
34 'maintainers' from participation. Future interventions may assess the efficacy of i) signposting  
35 invitees to online booking services, ii) text-messages which are delivered during GP opening hours  
36 and iii) sending reminders to reduce the likelihood of forgetting to book an appointment.  
37  
38  
39  
40  
41  
42  
43  
44  
45  
46  
47  
48  
49  
50  
51  
52  
53  
54  
55  
56  
57  
58  
59  
60

Table 1:

*Sample Characteristics (n=614)*

|                                 | Overall<br>(n=614) | Maintainers<br>(n=359) | Intenders<br>(n=255) | Difference between<br>maintainers and intenders |
|---------------------------------|--------------------|------------------------|----------------------|-------------------------------------------------|
|                                 | N (%)              | N (%)                  | N (%)                | Chi Square (df), P-value                        |
| <b>Age (years)</b>              |                    |                        |                      | 14.16 (3), <.001                                |
| 25-34                           | 192 (31.3)         | 103 (28.7)             | 89 (34.9)            |                                                 |
| 35-44                           | 183 (29.8)         | 95 (26.5)              | 88 (34.5)            |                                                 |
| 45-54                           | 137 (22.3)         | 88 (24.5)              | 49 (19.2)            |                                                 |
| 55-64                           | 102 (16.6)         | 73 (20.3)              | 29 (11.4)            |                                                 |
| <b>Ethnicity</b>                |                    |                        |                      | 0.10 (1), 0.76                                  |
| White                           | 547 (89.1)         | 321 (89.4)             | 226 (88.6)           |                                                 |
| All other groups                | 67 (10.9)          | 38 (10.6)              | 29 (11.4)            |                                                 |
| <b>Education level</b>          |                    |                        |                      | 2.12 (4), 0.71                                  |
| GCSE or below                   | 180 (29.3)         | 108 (30.1)             | 72 (28.2)            |                                                 |
| A level or equivalent           | 71 (11.6)          | 45 (12.5)              | 26 (10.2)            |                                                 |
| College qualification           | 115 (18.7)         | 62 (17.3)              | 53 (20.8)            |                                                 |
| Degree or higher                | 213 (34.7)         | 125 (34.8)             | 88 (34.5)            |                                                 |
| Other                           | 35 (5.7)           | 19 (5.3)               | 16 (6.3)             |                                                 |
| <b>Employment status</b>        |                    |                        |                      | 3.19 (2), 0.20                                  |
| Employed (full-time/part-time)  | 392 (63.8)         | 234 (65.2)             | 158 (62.0)           |                                                 |
| Unemployed                      | 182 (29.6)         | 98 (27.3)              | 84 (32.9)            |                                                 |
| Other                           | 40 (6.5)           | 27 (7.5)               | 13 (5.1)             |                                                 |
| <b>Marital status</b>           |                    |                        |                      | 2.89 (2), 0.24                                  |
| Single                          | 129 (21.0)         | 67 (18.7)              | 62 (24.3)            |                                                 |
| Married/living as married       | 413 (67.3)         | 249 (69.4)             | 164 (64.3)           |                                                 |
| Widowed/divorced/separated      | 72 (11.7)          | 43 (12.0)              | 29 (11.4)            |                                                 |
| <b>Parent/carer role</b>        |                    |                        |                      | 0.62 (0.45), 0.43                               |
| Yes                             | 387 (63.0)         | 221 (61.6)             | 166 (65.1)           |                                                 |
| No                              | 222 (36.2)         | 134 (37.3)             | 88 (34.5)            |                                                 |
| <b>Social status</b>            |                    |                        |                      | 7.93 (4), 0.09                                  |
| AB (highest)                    | 134 (21.8)         | 90 (25.1)              | 44 (17.3)            |                                                 |
| C1                              | 157 (25.6)         | 88 (24.5)              | 69 (27.1)            |                                                 |
| C2                              | 142 (23.1)         | 84 (23.4)              | 58 (22.7)            |                                                 |
| D                               | 93 (15.1)          | 54 (15.0)              | 39 (15.3)            |                                                 |
| E (lowest)                      | 88 (14.3)          | 43 (12.0)              | 45 (17.6)            |                                                 |
| <b>Booking history (Yes/No)</b> |                    |                        |                      |                                                 |
| Phoned the practice             | 545 (88.8)         | 316 (88.0)             | 229 (89.8)           | 0.47 (1), 0.49                                  |
| At reception (in person)        | 240 (39.1)         | 145 (40.4)             | 95 (37.3)            | 0.62 (1), 0.43                                  |
| 24-hr automated service         | 23 (3.7)           | 14 (3.9)               | 9 (3.5)              | 0.06 (1), 0.81                                  |
| Text-message                    | 7 (1.1)            | 4 (1.1)                | 3 (1.2)              | 0.01 (1), 0.94                                  |
| Website                         | 85 (13.8)          | 60 (16.7)              | 25 (9.8)             | 5.97 (1), <.05                                  |
| Smartphone app                  | 23 (3.7)           | 15 (4.2)               | 8 (3.1)              | 0.45 (1), 0.50                                  |
| <b>Phone ownership</b>          |                    |                        |                      | 0.72 (2), 0.70                                  |
| Smartphone                      | 533 (86.8)         | 315 (87.7)             | 218 (85.5)           |                                                 |
| Non-smartphone mobile           | 67 (10.9)          | 36 (10.0)              | 31 (12.2)            |                                                 |
| No phone                        | 14 (2.3)           | 8 (2.2)                | 6 (2.4)              |                                                 |

Table 2:

Practical barriers to appointment booking and booking characteristics considered to be important (n=614)

|                                                                                                        | All<br>(n=614)<br>N (%) | 'Maintainers'<br>(n=359)<br>N (%) | 'Intenders'<br>(n=255)<br>N (%) | OR for being<br>an 'intender' (95% CI) |
|--------------------------------------------------------------------------------------------------------|-------------------------|-----------------------------------|---------------------------------|----------------------------------------|
| <b>Practical barriers to booking screening (% agree/strongly agree)</b>                                |                         |                                   |                                 |                                        |
| It is ( <i>not</i> ) easy for me to find time to read a letter like this                               | 25 (4.1)                | 15 (4.2)                          | 10 (3.9)                        | 0.94 (0.41-2.12)                       |
| I might forget to book an appointment after reading this letter                                        | 187 (30.5)              | 76 (21.2)                         | 111 (43.5)                      | 2.87 (2.01-4.09)**                     |
| It is difficult for me to call my GP practice during their opening hours                               | 192 (31.3)              | 108 (30.1)                        | 84 (32.9)                       | 1.14 (0.81-1.61)                       |
| I ( <i>do not</i> ) have access to a telephone/mobile with phone credit/minutes to call my GP practice | 13 (2.1)                | 8 (2.2)                           | 5 (2.0)                         | 0.88 (0.28-2.71)                       |
| I would ( <i>not</i> ) find it easy to find the phone number for my GP practice to contact them        | 19 (3.1)                | 11 (3.1)                          | 8 (3.1)                         | 1.01 (0.41-2.59)                       |
| I find it difficult to get through to a receptionist when I phone my GP practice                       | 306 (49.8)              | 177 (49.3)                        | 129 (50.6)                      | 1.05 (0.76-1.45)                       |
| <b>Booking attributes (% saying quite/very important)</b>                                              |                         |                                   |                                 |                                        |
| Ease of booking                                                                                        | 519 (84.5)              | 305 (85.0)                        | 214 (83.9)                      | 0.92 (0.59-1.44)                       |
| Choice of appointments                                                                                 | 486 (79.2)              | 280 (78.0)                        | 206 (80.8)                      | 1.19 (0.83-1.77)                       |
| Being able to change an appointment after booking                                                      | 474 (77.2)              | 274 (76.3)                        | 200 (78.4)                      | 1.13 (0.77-1.66)                       |
| How long it takes to book appointment                                                                  | 424 (69.1)              | 235 (65.5)                        | 189 (74.1)                      | 1.51 (1.06-2.15)*                      |
| Waiting time for next available appointment                                                            | 428 (69.7)              | 245 (68.2)                        | 183 (71.8)                      | 1.18 (0.83-1.68)                       |
| Privacy when booking appointment                                                                       | 410 (66.8)              | 230 (64.1)                        | 180 (70.6)                      | 1.35 (0.95-1.90)                       |
| Being able to talk with a healthcare professional when booking                                         | 345 (56.2)              | 195 (54.3)                        | 150 (58.8)                      | 1.20 (0.87-1.66)                       |
| Being able to book an appointment when the GP practice is shut                                         | 284 (46.3)              | 173 (48.2)                        | 111 (43.5)                      | 0.83 (0.60-1.15) <sup>a</sup>          |
| Cost of making booking (i.e. phone credit)                                                             | 166 (27.0)              | 94 (26.2)                         | 72 (28.2)                       | 1.11 (0.77-1.59)                       |

Note. OR= odds ratio; CI= confidence interval; \*p<0.05, \*\*p<0.001, <sup>a</sup>30% missing data for this variable

Table 3:

Univariable logistic regression models of predictors of the acceptability of cervical screening invitation modalities (n=614)

|                                | Posted letter |                   | Text-message |                     | Email |                     | Mobile phone call |                     | Landline phone call |                    |
|--------------------------------|---------------|-------------------|--------------|---------------------|-------|---------------------|-------------------|---------------------|---------------------|--------------------|
|                                | %             | OR (95% CI)       | %            | OR (95% CI)         | %     | OR (95% CI)         | %                 | OR (95% CI)         | %                   | OR (95% CI)        |
| <b>All participants</b>        | 90.1          | 1.00              | 78.5         | 1.00                | 72.5  | 1.00                | 73.8              | 1.00                | 58.5                | 1.00               |
| <b>Age group</b>               |               |                   |              |                     |       |                     |                   |                     |                     |                    |
| 25-34                          | 92.2          | 1.00              | 86.7         | 1.00                | 80.9  | 1.00                | 82.4              | 1.00                | 65.0                | 1.00               |
| 35-44                          | 89.1          | 0.69 (0.34-1.39)  | 84.2         | 0.78 (0.45-1.34)    | 78.2  | 0.76 (0.47-1.23)    | 80.8              | 0.85 (0.52-1.41)    | 67.5                | 1.06 (0.70-1.61)   |
| 45-54                          | 86.9          | 0.56 (0.27-1.16)  | 78.7         | 0.64 (0.36-1.12)    | 74.1  | 0.71 (0.43-1.19)    | 69.1              | 0.52 (0.31-0.87)*   | 53.4                | 0.67 (0.43-1.04)   |
| 55-64                          | 92.2          | 1.00 (0.41-2.43)  | 65.6         | 0.29 (0.16-0.50)*** | 60.0  | 0.33 (0.20-0.56)*** | 62.9              | 0.36 (0.21-0.61)*** | 60.4                | 0.85 (0.52-1.38)   |
| <b>Social grade</b>            |               |                   |              |                     |       |                     |                   |                     |                     |                    |
| AB                             | 89.6          | 1.00              | 76.1         | 1.00                | 77.6  | 1.00                | 62.7              | 1.00                | 49.3                | 1.00               |
| C1                             | 85.4          | 0.68 (0.34-1.38)  | 77.1         | 1.05 (0.61-1.82)    | 73.2  | 0.79 (0.46-1.35)    | 67.5              | 1.24 (0.76-2.01)    | 51.6                | 1.10 (0.69-1.74)   |
| C2                             | 96.5          | 3.20 (1.12-9.14)* | 78.9         | 1.17 (0.67-2.06)    | 72.5  | 0.76 (0.44-1.32)    | 82.4              | 2.79 (1.60-4.86)*** | 65.5                | 1.96 (1.21-3.17)** |
| D                              | 93.5          | 1.69 (0.63-4.58)  | 84.9         | 1.77 (0.89-3.54)    | 77.4  | 0.99 (0.53-1.86)    | 77.4              | 2.04 (1.12-3.72)*   | 63.4                | 1.79 (1.04-3.07)*  |
| E                              | 85.2          | 0.67 (0.30-1.51)  | 77.3         | 1.07 (0.56-2.02)    | 58.0  | 0.40 (0.22-0.72)**  | 84.1              | 3.15 (1.61-6.15)**  | 68.2                | 2.01 (1.26-3.87)** |
| <b>Employment</b>              |               |                   |              |                     |       |                     |                   |                     |                     |                    |
| Employed                       | 91.1          | 1.00              | 78.8         | 1.00                | 76.0  | 1.00                | 72.4              | 1.00                | 55.1                | 1.00               |
| Unemployed                     | 86.8          | 0.65 (0.37-1.12)  | 79.7         | 1.05 (0.68-1.63)    | 67.0  | 0.64 (0.44-0.94)*   | 80.8              | 1.60 (1.04-2.46)*   | 66.5                | 1.62 (1.12-2.33)*  |
| Other (studying/retired)       | 95.0          | 1.86 (0.43-8.05)  | 70.0         | 0.63 (0.61-1.29)    | 62.5  | 0.53 (0.27-1.04)    | 55.0              | 0.47 (0.24-0.90)*   | 55.0                | 0.99 (0.52-1.92)   |
| <b>Ethnicity</b>               |               |                   |              |                     |       |                     |                   |                     |                     |                    |
| White                          | 91.0          | 1.00              | 77.7         | 1.00                | 71.1  | 1.00                | 73.1              | 1.00                | 57.6                | 1.00               |
| All other groups               | 82.1          | 0.45 (0.23-0.90)* | 85.1         | 1.64 (0.81-3.30)    | 83.6  | 2.07 (1.06-4.05)*   | 79.1              | 1.39 (0.75-2.58)    | 65.7                | 1.41 (0.83-2.40)   |
| <b>Caring responsibilities</b> |               |                   |              |                     |       |                     |                   |                     |                     |                    |
| No                             | 89.2          | 1.00              | 75.2         | 1.00                | 68.9  | 1.00                | 66.2              | 1.00                | 55.0                | 1.00               |
| Yes                            | 91.5          | 1.30 (0.75-2.26)  | 81.1         | 1.42 (0.95-2.11)    | 75.2  | 1.37 (0.95-1.97)    | 78.8              | 1.90 (1.31-2.75)**  | 61.0                | 1.28 (0.92-1.79)   |
| <b>Screening status</b>        |               |                   |              |                     |       |                     |                   |                     |                     |                    |
| Intender                       | 88.6          | 1.00              | 79.6         | 1.00                | 72.2  | 1.00                | 74.1              | 1.00                | 58.0                | 1.00               |
| Maintainer                     | 91.1          | 1.31 (0.77-2.23)  | 77.7         | 0.89 (0.60-1.32)    | 72.7  | 1.03 (0.72-1.47)    | 73.5              | 0.97 (0.67-1.40)    | 58.8                | 1.03 (0.74-1.43)   |
| <b>Practical barriers</b>      |               |                   |              |                     |       |                     |                   |                     |                     |                    |
| 0 barriers                     | 89.6          | 1.00              | 77.2         | 1.00                | 68.9  | 1.00                | 73.6              | 1.00                | 56.0                | 1.00               |
| 1 barrier                      | 93.2          | 1.57 (0.76-3.26)  | 77.9         | 1.04 (0.64-1.68)    | 72.1  | 1.17 (0.75-1.81)    | 74.7              | 1.06 (0.67-1.68)    | 57.9                | 1.08 (0.72-1.62)   |
| 2 barriers                     | 90.7          | 1.12 (0.55-2.31)  | 80.0         | 1.18 (0.70-1.99)    | 74.7  | 1.33 (0.83-2.14)    | 72.7              | 0.96 (0.59-1.55)    | 60.7                | 1.21 (0.79-1.87)   |
| 3 or more barriers             | 82.7          | 0.55 (0.26-1.16)  | 80.2         | 1.20 (0.63-2.28)    | 77.8  | 1.58 (0.86-2.89)    | 74.1              | 1.03 (0.57-1.85)    | 61.7                | 1.27 (0.75-2.16)   |

Note. OR= unadjusted odds ratio; CI= confidence interval; \*p<0.05, \*\*p<0.01, \*\*\*p<0.05

Table 4

Univariable logistic regression models of predictors of phone-based booking preferences (n=614)

|                                | Calling the GP        |                  | Calling a 24-hour automated service |                    | Requesting a call-back |                    |
|--------------------------------|-----------------------|------------------|-------------------------------------|--------------------|------------------------|--------------------|
|                                | % likely to book by.. | OR (95% CI)      | % likely to book by..               | OR (95% CI)        | % likely to book by..  | OR (95% CI)        |
| <b>All participants</b>        | 89.6                  | 1.00             | 51.6                                | 1.00               | 57.0                   | 1.00               |
| <b>Age group</b>               |                       |                  |                                     |                    |                        |                    |
| 25-34                          | 90.6                  | 1.00             | 60.9                                | 1.00               | 59.4                   | 1.00               |
| 35-44                          | 89.6                  | 0.89 (0.45-1.76) | 53.0                                | 0.73 (0.48-1.09)   | 61.7                   | 1.11 (0.73-1.67)   |
| 45-54                          | 89.1                  | 0.84 (0.41-1.73) | 44.5                                | 0.52 (0.33-0.80)** | 48.2                   | 0.64 (0.41-0.99)*  |
| 55-64                          | 88.2                  | 0.78 (0.36-1.68) | 41.2                                | 0.45 (0.28-0.73)** | 55.9                   | 0.87 (0.53-1.41)   |
| <b>Social grade</b>            |                       |                  |                                     |                    |                        |                    |
| AB                             | 88.8                  | 1.00             | 50.0                                | 1.00               | 53.7                   | 1.00               |
| C1                             | 86.0                  | 0.77 (0.38-1.56) | 49.0                                | 0.96 (0.61-1.53)   | 49.0                   | 0.83 (0.52-1.32)   |
| C2                             | 93.0                  | 1.66 (0.72-3.85) | 58.5                                | 1.41 (0.87-2.26)   | 59.9                   | 1.28 (0.80-2.07)   |
| D                              | 92.5                  | 1.55 (0.61-3.96) | 52.7                                | 1.11 (0.66-1.89)   | 63.4                   | 1.49 (0.87-2.57)   |
| E                              | 88.6                  | 0.98 (0.42-2.30) | 46.6                                | 0.87 (0.51-1.50)   | 64.8                   | 1.58 (0.91-2.76)   |
| <b>Employment</b>              |                       |                  |                                     |                    |                        |                    |
| Employed                       | 89.8                  | 1.00             | 52.8                                | 1.00               | 55.9                   | 1.00               |
| Unemployed                     | 89.6                  | 0.98 (0.55-1.74) | 50.0                                | 0.89 (0.63-1.27)   | 61.5                   | 1.26 (0.88-1.81)   |
| Other (studying/retired)       | 87.5                  | 0.80 (0.30-2.15) | 47.5                                | 0.81 (0.42-1.55)   | 47.5                   | 0.72 (0.37-1.37)   |
| <b>Ethnicity</b>               |                       |                  |                                     |                    |                        |                    |
| White                          | 89.8                  | 1.00             | 50.3                                | 1.00               | 56.3                   | 1.00               |
| All other groups               | 88.1                  | 0.84 (0.38-1.85) | 62.7                                | 1.66 (0.97-2.80)   | 62.7                   | 1.30 (0.77-2.20)   |
| <b>Caring responsibilities</b> |                       |                  |                                     |                    |                        |                    |
| No                             | 89.6                  | 1.00             | 50.9                                | 1.00               | 49.1                   | 1.00               |
| Yes                            | 90.7                  | 1.13 (0.65-1.96) | 52.7                                | 1.08 (0.77-1.50)   | 62.3                   | 1.71 (1.23-2.39)** |
| <b>Screening status</b>        |                       |                  |                                     |                    |                        |                    |
| Intender                       | 87.8                  | 1.00             | 53.7                                | 1.00               | 63.1                   | 1.00               |
| Maintainer                     | 90.8                  | 1.37 (0.81-2.30) | 50.1                                | 0.87 (0.63-1.20)   | 52.6                   | 0.65 (0.47-0.90)*  |
| <b>Practical barriers</b>      |                       |                  |                                     |                    |                        |                    |
| 0 barriers                     | 87.6                  | 1.00             | 47.2                                | 1.00               | 53.4                   | 1.00               |
| 1 barrier                      | 92.6                  | 1.79 (0.89-3.57) | 47.9                                | 1.03 (0.69-1.54)   | 53.2                   | 0.99 (0.66-1.48)   |
| 2 barriers                     | 92.0                  | 1.63 (0.79-3.37) | 56.7                                | 1.47 (0.95-2.25)   | 62.7                   | 1.47 (0.95-2.27)   |
| 3 or more barriers cited       | 82.7                  | 0.68 (0.33-1.39) | 63.0                                | 1.81 (1.06-3.07)*  | 61.7                   | 1.57 (0.92-2.68)   |

Note. OR= unadjusted odds ratio; CI= confidence interval; \*p<0.05, \*\*p<0.01, \*\*\*p<0.001



Table 5

Univariable logistic regression models of predictors of online booking preferences (n=614)

|                                | Booking on a website using a desktop/laptop |                     | Booking on a website using a smartphone <sup>a</sup> |                     | Downloading an app to your smartphone <sup>a</sup> |                     |
|--------------------------------|---------------------------------------------|---------------------|------------------------------------------------------|---------------------|----------------------------------------------------|---------------------|
|                                | % likely to book by..                       | OR (95% CI)         | % likely to book by..                                | OR (95% CI)         | % likely to book by..                              | OR (95% CI)         |
| <b>All participants</b>        | 57.8                                        | 1.00                | 56.4                                                 | 1.00                | 47.4                                               | 1.00                |
| <b>Age group</b>               |                                             |                     |                                                      |                     |                                                    |                     |
| 25-34                          | 67.7                                        | 1.00                | 71.9                                                 | 1.00                | 64.9                                               | 1.00                |
| 35-44                          | 59.6                                        | 0.70 (0.46-1.07)    | 64.6                                                 | 0.72 (0.45-1.12)    | 53.7                                               | 0.63 (0.41-0.97)*   |
| 45-54                          | 54.0                                        | 0.56 (0.36-0.88)*   | 53.1                                                 | 0.44 (0.27-0.72)**  | 42.5                                               | 0.40 (0.25-0.65)*** |
| 55-64                          | 41.2                                        | 0.33 (0.20-0.55)*** | 40.8                                                 | 0.27 (0.15-0.48)*** | 28.2                                               | 0.21 (0.12-0.39)*** |
| <b>Social grade</b>            |                                             |                     |                                                      |                     |                                                    |                     |
| AB                             | 70.1                                        | 1.00                | 71.4                                                 | 1.00                | 54.8                                               | 1.00                |
| C1                             | 56.1                                        | 0.54 (0.33-0.88)    | 61.0                                                 | 0.63 (0.37-1.05)    | 51.1                                               | 0.86 (0.53-1.40)    |
| C2                             | 58.5                                        | 0.60 (0.36-0.99)*   | 59.8                                                 | 0.60 (0.35-1.01)    | 54.9                                               | 1.01 (0.61-1.66)    |
| D                              | 57.0                                        | 0.56 (0.32-0.98)*   | 56.6                                                 | 0.52 (0.29-0.93)*   | 48.2                                               | 0.77 (0.44-1.34)    |
| E                              | 42.0                                        | 0.31 (0.18-0.54)*** | 52.5                                                 | 0.44 (0.23-0.83)*   | 45.9                                               | 0.70 (0.38-1.30)    |
| <b>Employment</b>              |                                             |                     |                                                      |                     |                                                    |                     |
| Employed                       | 62.5                                        | 1.00                | 65.4                                                 | 1.00                | 55.6                                               | 1.00                |
| Unemployed                     | 50.0                                        | 0.60 (0.41-0.86)**  | 56.1                                                 | 0.67 (0.46-1.00)*   | 48.0                                               | 0.74 (0.50-1.08)    |
| Other (studying/retired)       | 47.5                                        | 0.54 (0.28-1.04)    | 41.4                                                 | 0.37 (0.17-0.81)*   | 24.1                                               | 0.25 (0.11-0.61)**  |
| <b>Ethnicity</b>               |                                             |                     |                                                      |                     |                                                    |                     |
| White                          | 57.4                                        | 1.00                | 61.1                                                 | 1.00                | 51.5                                               | 1.00                |
| All other groups               | 61.2                                        | 1.17 (0.70-1.97)    | 65.1                                                 | 1.19 (0.69-2.06)    | 54.0                                               | 1.11 (0.65-1.87)    |
| <b>Caring responsibilities</b> |                                             |                     |                                                      |                     |                                                    |                     |
| No                             | 58.1                                        | 1.00                | 59.0                                                 | 1.00                | 46.4                                               | 1.00                |
| Yes                            | 58.4                                        | 1.01 (0.72-1.41)    | 63.8                                                 | 1.22 (0.85-1.77)    | 55.4                                               | 1.43 (1.00-2.05)    |
| <b>Screening status</b>        |                                             |                     |                                                      |                     |                                                    |                     |
| Intender                       | 57.3                                        | 1.00                | 62.4                                                 | 1.00                | 56.0                                               | 1.00                |
| Maintainer                     | 58.2                                        | 1.04 (0.75-1.44)    | 61.0                                                 | 0.94 (0.66-1.34)    | 48.9                                               | 0.75 (0.53-1.07)    |
| <b>Practical barriers</b>      |                                             |                     |                                                      |                     |                                                    |                     |
| 0 barriers                     | 47.7                                        | 1.00                | 50.6                                                 | 1.00                | 40.4                                               | 1.00                |
| 1 barrier                      | 58.4                                        | 1.54 (1.03-2.31)*   | 61.3                                                 | 1.54 (1.00-2.40)    | 51.2                                               | 1.55 (1.00-2.41)*   |
| 2 barriers                     | 64.7                                        | 2.01 (1.30-3.11)**  | 68.9                                                 | 2.17 (1.34-3.50)**  | 59.8                                               | 2.20 (1.38-3.51)**  |
| 3 or more barriers             | 64.2                                        | 2.32 (1.35-4.01)**  | 73.3                                                 | 2.69 (1.48-4.87)**  | 64.0                                               | 2.63 (1.49-4.62)**  |

Note. OR= unadjusted odds ratio; CI= confidence interval; \*p<0.05, \*\*p<0.01, \*\*\*p<0.001, <sup>a</sup> participants with no smartphone removed from analyses (n = 81)

1  
2  
3 Contributorship statement

4 MR (Conceptualisation; Data analysis; Project administration; Writing – original draft; Writing –  
5 review & editing)

6  
7  
8 JW (Conceptualisation; Supervision; Writing – review & editing)

9  
10 LM (Conceptualisation; Data analysis; Supervision; Writing – review & editing)

11 All authors approved the final manuscript as submitted.  
12  
13

14  
15 Competing interests

16 The authors have no competing interests to declare.  
17  
18

19  
20 Funding

21 MR, JW and LM are supported by a Cancer Research UK Career Development Fellowship awarded to  
22 JW (C7492/A17219)  
23  
24  
25

26  
27 Data sharing statement

28 Data used and analysed in the study are available from the corresponding author on request  
29 (l.marlow@ucl.ac.uk).  
30  
31  
32  
33  
34  
35  
36  
37  
38  
39  
40  
41  
42  
43  
44  
45  
46  
47  
48  
49  
50  
51  
52  
53  
54  
55  
56  
57  
58  
59  
60

## References

1. NHS. Cervical Screening Programme, England 2016-17, National Statistics. In: Screening & Immunisations Team ND, (ed.). 2017.
2. Landy R, Pesola F, Castanon A, et al. Impact of cervical screening on cervical cancer mortality: estimation using stage-specific results from a nested case-control study. *British journal of cancer* 2016; 115: 1140-1146. 2016/10/26. DOI: 10.1038/bjc.2016.290.
3. Waller J, Jackowska M, Marlow L, et al. Exploring age differences in reasons for nonattendance for cervical screening: a qualitative study. *BJOG : an international journal of obstetrics and gynaecology* 2012; 119: 26-32. 2011/06/15. DOI: 10.1111/j.1471-0528.2011.03030.x.
4. Hope KA, Moss E, Redman CWE, et al. Psycho-social influences upon older women's decision to attend cervical screening: A review of current evidence. *Prev Med* 2017; 101: 60-66. 2017/05/16. DOI: 10.1016/j.ypmed.2017.05.002.
5. Douglas E, Waller J, Duffy SW, et al. Socioeconomic inequalities in breast and cervical screening coverage in England: are we closing the gap? *Journal of medical screening* 2016; 23: 98-103. 2015/09/18. DOI: 10.1177/0969141315600192.
6. Spencer AM, Roberts SA, Brabin L, et al. Sociodemographic factors predicting mother's cervical screening and daughter's HPV vaccination uptake. *Journal of epidemiology and community health* 2014; 68: 571-577. 2014/02/26. DOI: 10.1136/jech-2013-202629.
7. Sutton S and Rutherford C. Sociodemographic and attitudinal correlates of cervical screening uptake in a national sample of women in Britain. *Social Science & Medicine* 2005; 61: 2460-2465. DOI: <https://doi.org/10.1016/j.socscimed.2005.07.017>.
8. Young B, Bedford L, Kendrick D, et al. Factors influencing the decision to attend screening for cancer in the UK: a meta-ethnography of qualitative research. *Journal of public health (Oxford, England)* 2018; 40: 315-339. 2017/05/10. DOI: 10.1093/pubmed/idx026.
9. Marlow LAV, Ferrer RA, Chorley AJ, et al. Variation in health beliefs across different types of cervical screening non-participants. *Preventive Medicine* 2018; 111: 204-209. DOI: <https://doi.org/10.1016/j.ypmed.2018.03.014>.
10. Waller J, Bartoszek M, Marlow L, et al. Barriers to cervical cancer screening attendance in England: a population-based survey. *Journal of medical screening* 2009; 16: 199-204. 2010/01/08. DOI: 10.1258/jms.2009.009073.
11. Marlow LAV, Chorley AJ, Haddrell J, et al. Understanding the heterogeneity of cervical cancer screening non-participants: Data from a national sample of British women. *Eur J Cancer* 2017; 80: 30-38. 2017/05/24. DOI: 10.1016/j.ejca.2017.04.017.
12. Sheeran P and Conner M. Improving the translation of intentions into health actions: The role of motivational coherence. *Health psychology : official journal of the Division of Health Psychology, American Psychological Association* 2017; 36: 1065-1073. 2017/08/22. DOI: 10.1037/hea0000553.
13. Sheeran P. Intention—Behavior Relations: A Conceptual and Empirical Review. *European review of social psychology* 2002; 12: 1-36. DOI: 10.1080/14792772143000003.
14. Weinstein ND. The precaution adoption process. *Health psychology : official journal of the Division of Health Psychology, American Psychological Association* 1988; 7: 355-386. 1988/01/01.
15. Sheeran P and Webb T. The Intention—Behavior Gap. *Social and Personality Psychology Compass* 2016; 10: 503-518. DOI: doi:10.1111/spc3.12265.
16. Everett T, Bryant A, Griffin MF, et al. Interventions targeted at women to encourage the uptake of cervical screening. *The Cochrane database of systematic reviews* 2011: CD002834. 2011/05/13. DOI: 10.1002/14651858.CD002834.pub2.
17. McDowell I, Newell C and Rosser W. Computerized reminders to encourage cervical screening in family practice. *The Journal of family practice* 1989; 28: 420-424. 1989/04/01.
18. Binstock MA, Geiger AM, Hackett JR, et al. Pap smear outreach: a randomized controlled trial in an HMO. *American journal of preventive medicine* 1997; 13: 425-426. 1998/01/07.

19. Duffy SW, Myles JP, Maroni R, et al. Rapid review of evaluation of interventions to improve participation in cancer screening services. *Journal of medical screening* 2017; 24: 127-145. 2016/10/19. DOI: 10.1177/0969141316664757.
20. Kitchener HC, Gittins M, Rivero-Arias O, et al. A cluster randomised trial of strategies to increase cervical screening uptake at first invitation (STRATEGIC). *Health technology assessment (Winchester, England)* 2016; 20: 1-138. 2016/09/17. DOI: 10.3310/hta20680.
21. Ipsos. Social grade: a classification tool. 2009.
22. Kerrison RS, Shukla H, Cunningham D, et al. Text-message reminders increase uptake of routine breast screening appointments: a randomised controlled trial in a hard-to-reach population. *British journal of cancer* 2015; 112: 1005-1010. 2015/02/11. DOI: 10.1038/bjc.2015.36.
23. Chorley AJ, Marlow LA, Forster AS, et al. Experiences of cervical screening and barriers to participation in the context of an organised programme: a systematic review and thematic synthesis. *Psycho-oncology* 2017; 26: 161-172. 2016/04/14. DOI: 10.1002/pon.4126.
24. Quinn M, Babb P, Jones J, et al. Effect of screening on incidence of and mortality from cancer of cervix in England: evaluation based on routinely collected statistics. *BMJ (Clinical research ed)* 1999; 318: 904-908. 1999/04/02.
25. ONS. Labour Force Survey. Office for National Statistics, 2018.
26. MORI I. The GP Patient Survey 2018. Ipsos MORI, 2018.
27. Einstein GO, McDaniel MA, Williford CL, et al. Forgetting of intentions in demanding situations is rapid. *Journal of experimental psychology Applied* 2003; 9: 147-162. 2003/10/23. DOI: 10.1037/1076-898x.9.3.147.
28. Johnson HC, Lafferty EI, Eggo RM, et al. Effect of HPV vaccination and cervical cancer screening in England by ethnicity: a modelling study. *The Lancet Public health* 2018; 3: e44-e51. 2018/01/09. DOI: 10.1016/s2468-2667(17)30238-4.

**Online Supplement 1: Could changing invitation and booking processes help women translate their cervical screening intentions into action: a population-based survey of women's preferences**  
(Mairead Ryan, Jo Waller and Laura Marlow)

*Questionnaire*

Have you ever been diagnosed with cervical cancer?

- 1 Yes
- 2 No

The next few questions in this section are about cervical screening, also known as a smear or a Pap test. The NHS Cervical Screening Programme invites women in England for a cervical screening, smear or Pap test every 3 years from age 25 to age 49 and every 5 years from age 50 to age 64. Which of these statements describes whether you have had a cervical screening? If you have had a cervical screening and can't remember when, please give your best estimate.

- 1 I have had a test within the last 3 years
- 2 My last test was 3 to 5 years ago
- 3 My last test was more than 5 years ago
- 4 I have never been invited to have a test
- 5 I have been invited but have never had a test
- 6 I have had a hysterectomy so I don't need to have tests
- 7 I have never heard of cervical screening

Will you go for cervical screening when next invited?

- 1 Definitely not
- 2 Probably not
- 3 Yes, probably
- 4 Yes, definitely

On the next screen will be an invitation letter that the NHS sends to women to invite them to book a cervical screening appointment. Most women book cervical screening appointments at their GP practice. I would like you to imagine you received this letter in the post. Please read the letter and afterwards you will be asked some questions about your response to the letter.

\* Picture of NHS screening letter shown to participant

I will now read a number of statements relating to the cervical screening letter you've just read. After each statement, please state the extent to which you agree, on a scale from 'strongly disagree' to 'strongly agree'.

How much do you agree or disagree with this statement?

It is easy for me to find time to read a letter like this.

- 1 Strongly disagree
- 2 Disagree
- 3 Neither disagree or agree
- 4 Agree
- 5 Strongly agree

1  
2  
3 How much do you agree or disagree with this statement?

4 I might forget to book an appointment after reading this letter.

- 5 1 Strongly disagree  
6 2 Disagree  
7 3 Neither disagree or agree  
8 4 Agree  
9 5 Strongly agree  
10

11  
12 How much do you agree or disagree with this statement?

13 It is difficult for me to call my GP practice during their opening hours.

14 \*GP opening hours provided if necessary: "Opening hours are generally between 8.00am to 6.30pm  
15 Monday to Friday"

- 16 1 Strongly disagree  
17 2 Disagree  
18 3 Neither disagree or agree  
19 4 Agree  
20 5 Strongly agree  
21  
22

23 How much do you agree or disagree with this statement?

24 I have access to a telephone/mobile with phone credit/minutes to call my GP practice.

- 25 1 Strongly disagree  
26 2 Disagree  
27 3 Neither disagree or agree  
28 4 Agree  
29 5 Strongly agree  
30  
31

32  
33 How much do you agree or disagree with this statement?

34 It would be easy for me to find the phone number for my GP practice to contact them.

- 35 1 Strongly disagree  
36 2 Disagree  
37 3 Neither disagree or agree  
38 4 Agree  
39 5 Strongly agree  
40  
41

42 How much do you agree or disagree with this statement?

43 I find it takes too long to get through to a receptionist when I phone my GP practice.

- 44 1 Strongly disagree  
45 2 Disagree  
46 3 Neither disagree or agree  
47 4 Agree  
48 5 Strongly agree  
49  
50

51 We are interested in what is important to you in terms of booking a cervical screening appointment.  
52 For the following statements I read out, please state the extent to which you think each factor is  
53 important to you, on a scale from 'very unimportant' to 'very important' when booking an  
54 appointment at your GP practice.  
55  
56  
57  
58  
59  
60

1  
2  
3 How important is this when booking a cervical screening appointment at your GP practice?

4 Ease of booking

- 5 1 Very unimportant  
6 2 Quite unimportant  
7 3 Neither unimportant or important  
8 4 Quite important  
9 5 Very important

10  
11  
12 How important is this when booking a cervical screening appointment at your GP practice?

13 Cost of making booking (i.e. phone credit)

- 14 1 Very unimportant  
15 2 Quite unimportant  
16 3 Neither unimportant or important  
17 4 Quite important  
18 5 Very important

19  
20  
21 How important is this when booking a cervical screening appointment at your GP practice?

22 Choice of appointment times

- 23 1 Very unimportant  
24 2 Quite unimportant  
25 3 Neither unimportant or important  
26 4 Quite important  
27 5 Very important

28  
29  
30 How important is this when booking a cervical screening appointment at your GP practice?

31 Being able to change an appointment time/day after booking it

- 32 1 Very unimportant  
33 2 Quite unimportant  
34 3 Neither unimportant or important  
35 4 Quite important  
36 5 Very important

37  
38  
39 How important is this when booking a cervical screening appointment at your GP practice?

40 Privacy when booking an appointment

- 41 1 Very unimportant  
42 2 Quite unimportant  
43 3 Neither unimportant or important  
44 4 Quite important  
45 5 Very important

46  
47  
48 How important is this when booking a cervical screening appointment at your GP practice?

49 How long it takes to book an appointment

- 50 1 Very unimportant  
51 2 Quite unimportant  
52 3 Neither unimportant or important  
53 4 Quite important  
54 5 Very important

1  
2  
3 How important is this when booking a cervical screening appointment at your GP practice?  
4 Being able to talk with a healthcare professional when booking (e.g. to ask questions about the  
5 screening before attending)

- 6           1       Very unimportant  
7           2       Quite unimportant  
8           3       Neither unimportant or important  
9           4       Quite important  
10          5       Very important  
11  
12

13 How important is this when booking a cervical screening appointment at your GP practice?  
14 Time to the next available appointment (e.g. next available appointment isn't for two weeks)

- 15          1       Very unimportant  
16          2       Quite unimportant  
17          3       Neither unimportant or important  
18          4       Quite important  
19          5       Very important  
20  
21

22 How important is this when booking a cervical screening appointment at your GP practice?  
23 Being able to book an appointment when the GP practice is shut (e.g. online booking)  
24 \*GP opening hours provided if necessary: "Opening hours are generally between 8.00am to 6.30pm  
25 Monday to Friday"

- 26          1       Very unimportant  
27          2       Quite unimportant  
28          3       Neither unimportant or important  
29          4       Quite important  
30          5       Very important  
31  
32

33 Again thinking about the letter you read which is sent in the post to invite women to book a cervical  
34 screening appointment. We are interested in different forms of communication to invite women to  
35 book a cervical screening appointment.  
36

37 Please state the extent to which you think the following forms of communication are acceptable, on  
38 a scale from 'very unacceptable' to 'very acceptable'.  
39  
40

41 How acceptable is this form of communication when being invited to book a cervical screening  
42 appointment?  
43

44 Posted letter

- 45          1       Very unacceptable  
46          2       Quite unacceptable  
47          3       Neither unacceptable or acceptable  
48          4       Quite acceptable  
49          5       Very acceptable  
50

51 \* If participant responded 'Quite unacceptable' or 'Very unacceptable', participant subsequently  
52 asked: Please can you tell me why you would not find receiving an invitation for a cervical screening  
53 appointment by posted letter acceptable?  
54  
55  
56  
57  
58  
59  
60



1  
2  
3 How acceptable is this form of communication when being invited to book a cervical screening  
4 appointment?

5 Text message

- 6 1 Very unacceptable  
7 2 Quite unacceptable  
8 3 Neither unacceptable or acceptable  
9 4 Quite acceptable  
10 5 Very acceptable  
11  
12

13 \* If participant responded 'Quite unacceptable' or 'Very unacceptable', participant subsequently  
14 asked: Please can you tell me why you would not find receiving an invitation for a cervical screening  
15 appointment by text message acceptable?  
16

17 How acceptable is this form of communication when being invited to book a cervical screening  
18 appointment?

19 Email

- 20  
21 1 Very unacceptable  
22 2 Quite unacceptable  
23 3 Neither unacceptable or acceptable  
24 4 Quite acceptable  
25 5 Very acceptable  
26  
27

28 \* If participant responded 'Quite unacceptable' or 'Very unacceptable', participant subsequently  
29 asked: Please can you tell me why you would not find receiving an invitation for a cervical screening  
30 appointment by email acceptable?  
31

32 How acceptable is this form of communication when being invited to book a cervical screening  
33 appointment?

34 Phone call to your mobile phone

- 35 1 Very unacceptable  
36 2 Quite unacceptable  
37 3 Neither unacceptable or acceptable  
38 4 Quite acceptable  
39 5 Very acceptable  
40  
41

42 \* If participant responded 'Quite unacceptable' or 'Very unacceptable', participant subsequently  
43 asked: Please can you tell me why you would not find receiving an invitation for a cervical screening  
44 appointment by phone call to your mobile phone acceptable?  
45

46 How acceptable is this form of communication when being invited to book a cervical screening  
47 appointment?

48 Phone call to your house landline

- 49 1 Very unacceptable  
50 2 Quite unacceptable  
51 3 Neither unacceptable or acceptable  
52 4 Quite acceptable  
53 5 Very acceptable  
54  
55

56 \* If participant responded 'Quite unacceptable' or 'Very unacceptable', participant subsequently  
57 asked: Please can you tell me why you would not find receiving an invitation for a cervical screening  
58 appointment by phone call to your house landline acceptable?  
59  
60

1  
2  
3  
4 Imagine now that different options were available to you to book a cervical screening appointment  
5 at your GP practice. Please state the extent to which you are likely to use each of the following  
6 methods to book an appointment.  
7

8  
9 How likely are you to use this method to book a cervical screening appointment at your GP practice?

10 Calling your GP practice

- 11 1 Very unlikely  
12 2 Quite unlikely  
13 3 Neither likely or unlikely  
14 4 Quite likely  
15 5 Very likely  
16

17  
18 How likely are you to use this method to book a cervical screening appointment at your GP practice?

19 Calling a 24-hour automated telephone appointment-booking system

- 20 1 Very unlikely  
21 2 Quite unlikely  
22 3 Neither likely or unlikely  
23 4 Quite likely  
24 5 Very likely  
25

26  
27 How likely are you to use this method to book a cervical screening appointment at your GP practice?

28 Requesting a call-back from your GP practice

- 29 1 Very unlikely  
30 2 Quite unlikely  
31 3 Neither likely or unlikely  
32 4 Quite likely  
33 5 Very likely  
34

35  
36 How likely are you to use this method to book a cervical screening appointment at your GP practice?

37 Booking on a website using a desktop computer/laptop

- 38 1 Very unlikely  
39 2 Quite unlikely  
40 3 Neither likely or unlikely  
41 4 Quite likely  
42 5 Very likely  
43

44  
45 How likely are you to use this method to book a cervical screening appointment at your GP practice?

46 Booking on a website using a smartphone

- 47 1 Very unlikely  
48 2 Quite unlikely  
49 3 Neither likely or unlikely  
50 4 Quite likely  
51 5 Very likely  
52  
53  
54  
55  
56  
57  
58  
59  
60

1  
2  
3 How likely are you to use this method to book a cervical screening appointment at your GP practice?  
4 Downloading an app to a smartphone to book an appointment (you could then use the app to book  
5 other appointments at your surgery)

- 6           1       Very unlikely  
7           2       Quite unlikely  
8           3       Neither likely or unlikely  
9           4       Quite likely  
10          5       Very likely

11  
12  
13 Which of the following methods have you previously used to book an appointment at your GP  
14 practice? This could be an appointment for anything, with a GP or with a nurse.

15 Please select all that apply.

- 16           1       Booked in person (i.e. at the reception desk)  
17           2       Booked by phoning the GP practice  
18           3       Booked using a 24-hour automated telephone appointment-booking system  
19           4       Booked online on a website  
20           5       Booked by text-message  
21           6       Booked using a smartphone app  
22           7       Other  
23           8       Don't know - someone else has always booked my appointments  
24           9       I have never booked an appointment at my GP practice

25  
26  
27 Do you have a mobile phone?

28 \*Description of smartphone provided if necessary; "A 'smart phone' is a mobile phone that performs  
29 many of the functions of a computer, typically having a touchscreen and Internet access"

- 30           1       Yes, a smart phone  
31           2       Yes, but it is not a smart phone  
32           3       No, I do not have a mobile phone  
33  
34  
35  
36  
37  
38  
39  
40  
41  
42  
43  
44  
45  
46  
47  
48  
49  
50  
51  
52  
53  
54  
55  
56  
57  
58  
59  
60

**Online Supplement 2: Could changing invitation and booking processes help women translate their cervical screening intentions into action: a population-based survey of women's preferences**  
(Mairead Ryan, Jo Waller and Laura Marlow)

Table 1:

*Multivariable logistic regression models of predictors of the acceptability of cervical screening invitation modalities (n=614)*

|                                | Posted letter      | Text-message        | Email               | Mobile phone call  | Landline phone call |
|--------------------------------|--------------------|---------------------|---------------------|--------------------|---------------------|
|                                | OR (95% CI)        | OR (95% CI)         | OR (95% CI)         | OR (95% CI)        | OR (95% CI)         |
| <b>Age group</b>               |                    |                     |                     |                    |                     |
| 25-34                          | 1.00               | 1.00                | 1.00                | 1.00               | 1.00                |
| 35-44                          | 0.63 (0.30-1.34)   | 0.71 (0.40-1.25)    | 0.64 (0.38-1.05)    | 0.78 (0.46-1.32)   | 1.06 (0.68-1.63)    |
| 45-54                          | 0.49 (0.22-1.06)   | 0.63 (0.35-1.12)    | 0.71 (0.42-1.20)    | 0.50 (0.30-0.85)*  | 0.70 (0.44-1.10)    |
| 55-64                          | 1.03 (0.36-2.94)   | 0.29 (0.15-0.53)*** | 0.35 (0.19-0.63)*** | 0.47 (0.26-0.86)*  | 0.99 (0.58-1.70)    |
| <b>Social grade</b>            |                    |                     |                     |                    |                     |
| AB                             | 1.00               | 1.00                | 1.00                | 1.00               | 1.00                |
| C1                             | 0.78 (0.36-1.66)   | 1.03 (0.58-1.82)    | 0.75 (0.43-1.32)    | 1.17 (0.71-1.94)   | 1.04 (0.65-1.67)    |
| C2                             | 3.47 (1.18-10.27)* | 1.04 (0.58-1.87)    | 0.68 (0.39-1.21)    | 2.58 (1.45-4.58)** | 1.82 (1.11-2.99)    |
| D                              | 1.75 (0.63-4.92)   | 1.60 (0.78-3.28)    | 0.90 (0.47-1.73)    | 1.82 (0.98-3.39)   | 1.67 (0.96-2.90)    |
| E                              | 0.88 (0.31-2.52)   | 0.92 (0.42-2.01)    | 0.38 (0.19-0.78)**  | 2.98 (1.35-6.58)** | 1.76 (0.90-3.43)    |
| <b>Employment</b>              |                    |                     |                     |                    |                     |
| Employed                       | 1.00               | 1.00                | 1.00                | 1.00               | 1.00                |
| Unemployed                     | 0.63 (0.30-1.33)   | 1.12 (0.65-1.94)    | 0.89 (0.54-1.47)    | 1.06 (0.63-1.79)   | 1.31 (0.83-2.06)    |
| Other (studying/retired)†      | -                  | -                   | -                   | -                  | -                   |
| <b>Ethnicity</b>               |                    |                     |                     |                    |                     |
| White                          | 1.00               | 1.00                | 1.00                | 1.00               | 1.00                |
| All other groups               | 0.45 (0.21-0.97)*  | 1.60 (0.75-3.39)    | 2.22 (1.08-4.57)*   | 1.26 (0.65-2.45)   | 1.38 (0.79-2.42)    |
| <b>Caring responsibilities</b> |                    |                     |                     |                    |                     |
| No                             | 1.00               | 1.00                | 1.00                | 1.00               | 1.00                |
| Yes                            | 1.79 (0.96-3.23)   | 1.09 (0.70-1.69)    | 1.19 (0.79-1.80)    | 1.60 (1.06-2.41)*  | 1.20 (0.83-1.73)    |

*Note.* OR= adjusted odds ratio; CI= confidence interval; \*p<0.05, \*\*p<0.01, \*\*\*p<0.001; 'screening status' and 'practical barriers' variables not included because not significant in univariable analyses; †category not included due to insufficient cases

1  
2  
3  
4  
5  
6  
7  
8  
9  
10  
11  
12  
13  
14  
15  
16  
17  
18  
19  
20  
21  
22  
23  
24  
25  
26  
27  
28  
29  
30  
31  
32  
33  
34  
35  
36  
37  
38  
39  
40  
41  
42  
43  
44  
45  
46

Table 2

Multivariable logistic regression models of predictors of phone-based booking preferences (n=614)

|                                | Calling the GP   | Calling a 24-hour automated service | Requesting a call-back |
|--------------------------------|------------------|-------------------------------------|------------------------|
|                                | OR (95% CI)      | OR (95% CI)                         | OR (95% CI)            |
| <b>Age group</b>               |                  |                                     |                        |
| 25-34                          | 1.00             | 1.00                                | 1.00                   |
| 35-44                          | 0.78 (0.38-1.60) | 0.68 (0.45-1.04)                    | 0.96 (0.62-1.47)       |
| 45-54                          | 0.70 (0.32-1.50) | 0.50 (0.32-0.79)*                   | 0.65 (0.41-1.03)       |
| 55-64                          | 0.76 (0.31-1.83) | 0.45 (0.27-0.76)**                  | 1.19 (0.70-2.01)       |
| <b>Caring responsibilities</b> |                  |                                     |                        |
| No                             | 1.00             | 1.00                                | 1.00                   |
| Yes                            | 1.11 (0.61-2.01) | 0.95 (0.67-1.37)                    | 1.82 (1.26-2.62)**     |
| <b>Screening status</b>        |                  |                                     |                        |
| Intender                       | 1.00             | 1.00                                | 1.00                   |
| Maintainer                     | 1.55 (0.89-2.68) | 0.97 (0.70-1.36)                    | 0.68 (0.48-0.95)*      |
| <b>Practical barriers</b>      |                  |                                     |                        |
| 0 barriers                     | 1.00             | 1.00                                | 1.00                   |
| 1 barrier                      | 1.48 (0.71-3.06) | 0.90 (0.59-1.36)                    | 0.81 (0.53-1.23)       |
| 2 barriers                     | 1.39 (0.65-2.97) | 1.26 (0.81-1.96)                    | 1.26 (0.80-1.97)       |
| 3 or more barriers cited       | 0.63 (0.29-1.37) | 1.63 (0.94-2.82)                    | 1.35 (0.77-2.36)       |

Note. OR= adjusted odds ratio; CI= confidence interval; \*p<0.05, \*\*p<0.01, \*\*\*p<0.001; 'social grade', 'employment' and 'ethnicity' not included because not significant in univariable analyses

Table 3

Multivariable logistic regression models of predictors of online booking preferences (n=614)

|                           | Booking on a website<br>using a desktop/laptop | Booking on a website<br>using a smartphone <sup>a</sup> | Downloading an app to<br>your smartphone <sup>a</sup> |
|---------------------------|------------------------------------------------|---------------------------------------------------------|-------------------------------------------------------|
|                           | OR (95% CI)                                    | OR (95% CI)                                             | OR (95% CI)                                           |
| <b>Age group</b>          |                                                |                                                         |                                                       |
| 25-34                     | 1.00                                           | 1.00                                                    | 1.00                                                  |
| 35-44                     | 0.64 (0.42-1.00)*                              | 0.58 (0.37-0.91)*                                       | 0.50 (0.33-0.77)**                                    |
| 45-54                     | 0.58 (0.36-0.93)*                              | 0.33 (0.20-0.53)***                                     | 0.29 (0.18-0.47)***                                   |
| 55-64                     | 0.34 (0.20-0.58)***                            | 0.19 (0.11-0.33)***                                     | 0.17 (0.10-0.31)***                                   |
| <b>Social grade</b>       |                                                |                                                         |                                                       |
| AB                        | 1.00                                           | 1.00                                                    | 1.00                                                  |
| C1                        | 0.52 (0.31-0.86)*                              | 0.61 (0.36-1.02)                                        | 0.88 (0.53-1.45)                                      |
| C2                        | 0.55 (0.33-0.93)*                              | 0.43 (0.25-0.73)**                                      | 0.76 (0.46-1.28)                                      |
| D                         | 0.50 (0.78-0.89)*                              | 0.43 (0.24-0.78)**                                      | 0.66 (0.37-1.18)                                      |
| E                         | 0.35 (0.18-0.69)**                             | 0.42 (0.21-0.84)*                                       | 0.63 (0.31-1.28)                                      |
| <b>Employment</b>         |                                                |                                                         |                                                       |
| Employed                  | 1.00                                           | 1.00                                                    | 1.00                                                  |
| Unemployed                | 0.80 (0.51-1.24)                               | 0.72 (0.46-1.14)                                        | 0.76 (0.48-1.20)                                      |
| Other (studying/retired)  | 0.82 (0.39-1.73)                               | 0.54 (0.25-1.17)                                        | 0.35 (0.14-0.85)*                                     |
| <b>Practical barriers</b> |                                                |                                                         |                                                       |
| 0 barriers                | 1.00                                           | 1.00                                                    | 1.00                                                  |
| 1 barrier                 | 1.46 (0.96-2.23)                               | 1.20 (0.78-1.85)                                        | 1.17 (0.76-1.81)                                      |
| 2 barriers                | 1.73 (1.10-2.73)*                              | 1.82 (1.13-1.91)*                                       | 1.77 (1.11-2.82)*                                     |
| 3 or more barriers        | 2.16 (1.22-3.82)**                             | 2.59 (1.43-4.69)**                                      | 2.57 (1.45-4.56)**                                    |

Note. OR= adjusted odds ratio; CI= confidence interval; \*p<0.05, \*\*p<0.01, \*\*\*p<0.001; <sup>a</sup> participants with no smartphone removed from analyses (n = 81); 'ethnicity', 'caring responsibilities' and 'screening status' not included because not significant in univariable analyses

**Online Supplement 3: Could changing invitation and booking processes help women translate their cervical screening intentions into action: a population-based survey of women's preferences**  
(Mairead Ryan, Jo Waller and Laura Marlow)

*Open responses provided for citing invitation method as unacceptable*

| Invitation mode | Unacceptable (n) | Reasons for being unacceptable                                                                                                                                                                                                                                                                                                                                                                                                                                                                                             |
|-----------------|------------------|----------------------------------------------------------------------------------------------------------------------------------------------------------------------------------------------------------------------------------------------------------------------------------------------------------------------------------------------------------------------------------------------------------------------------------------------------------------------------------------------------------------------------|
| Posted letter   | 12               | Don't open post/might miss the letter/no time to read letter (n=4)<br>Receive letter too late (n=2)<br>Letter could be lost in the post (n=2)<br>Other (n=4) <ul style="list-style-type: none"> <li>• Would forget (n=1)</li> <li>• Environmental concerns (n=1)</li> <li>• Waste of time (n=1)</li> <li>• No reason provided (n=1)</li> </ul>                                                                                                                                                                             |
| Text-message    | 67               | Privacy concerns (n=21)<br>Easy to miss it/may not read message (n=9)<br>Reason not provided (i.e. N/A) (n=9)<br>Doesn't have or use mobile (n=7)<br>Impersonal (n=6)<br>Could change number (n=4)<br>Prefer a letter/phone call (n=4)<br>Not reliable source/unprofessional (n=3)<br>Would forget/not act on it (n=2)<br>Other (n=2) <ul style="list-style-type: none"> <li>• Don't know (n=1)</li> <li>• They can text me but I don't want to text them (n=1)</li> </ul>                                                 |
| Email           | 94               | Would be lost in other emails/would not be seen (n=38)<br>No email/doesn't use email/no internet/no computer (n=17)<br>Privacy concerns (n=12)<br>Reason not provided (i.e. N/A) (n=12)<br>Prefer phone or letter (n=5)<br>Would forget/not act on it (n=2)<br>Impersonal/rude (n=2)<br>Other (n=6) <ul style="list-style-type: none"> <li>• Not timely (n=1)</li> <li>• Intrusive (n=1)</li> <li>• Not normal (n=1)</li> <li>• No reason (n=1)</li> <li>• Not keen (n=1)</li> <li>• Doesn't trust source (n=1)</li> </ul> |
| Mobile phone    | 90               | Would not be able to pick up/would miss call (n=33)<br>Privacy concerns (n=22)                                                                                                                                                                                                                                                                                                                                                                                                                                             |

|                     |     |                                                                                                                                                                                                                                                                                                                                                                                                                                                                                                                                                                      |
|---------------------|-----|----------------------------------------------------------------------------------------------------------------------------------------------------------------------------------------------------------------------------------------------------------------------------------------------------------------------------------------------------------------------------------------------------------------------------------------------------------------------------------------------------------------------------------------------------------------------|
| call                |     | <p>Would prefer in writing/a letter (n=10)<br/> Reason not provided (i.e. N/A) (n=8)<br/> Would not know number – so would not answer call (n=5)<br/> No mobile (n=2)<br/> Would forget (n=2)<br/> Too many phone calls (n=2)<br/> Other (n=6)</p> <ul style="list-style-type: none"> <li>• Don't like idea (n=1)</li> <li>• Talking takes too much time (n=1)</li> <li>• Need time to think (n=1)</li> <li>• Impersonal (n=1)</li> <li>• People change phone number (n=1)</li> <li>• Don't like calls (n=1)</li> </ul>                                              |
| Landline phone call | 129 | <p>No landline (n=39)<br/> Would miss call/out of the house during the day (n=31)<br/> Privacy concerns (n=24)<br/> No reason provided (i.e. N/A) (n=12)<br/> Feels intrusive (n=5)<br/> Prefer in writing/letter (n=5)<br/> Don't want phone call (n=4)<br/> Not reliable source (n=3)<br/> Other (n=6)</p> <ul style="list-style-type: none"> <li>• Impersonal (n=1)</li> <li>• "Better with working" (n=1)</li> <li>• Unnecessary (n=1)</li> <li>• Unknown number (n=1)</li> <li>• Want time to think (n=1)</li> <li>• Doesn't matter either way (n=1)</li> </ul> |



STROBE 2007 (v4) Statement—Checklist of items that should be included in reports of cross-sectional studies

| Section/Topic             | Item # | Recommendation                                                                                                                                                                       | Reported on page # |
|---------------------------|--------|--------------------------------------------------------------------------------------------------------------------------------------------------------------------------------------|--------------------|
| Title and abstract        | 1      | (a) Indicate the study’s design with a commonly used term in the title or the abstract                                                                                               | 2                  |
|                           |        | (b) Provide in the abstract an informative and balanced summary of what was done and what was found                                                                                  | 2                  |
| <b>Introduction</b>       |        |                                                                                                                                                                                      |                    |
| Background/rationale      | 2      | Explain the scientific background and rationale for the investigation being reported                                                                                                 | 3-4                |
| Objectives                | 3      | State specific objectives, including any prespecified hypotheses                                                                                                                     | 4                  |
| <b>Methods</b>            |        |                                                                                                                                                                                      |                    |
| Study design              | 4      | Present key elements of study design early in the paper                                                                                                                              | 4                  |
| Setting                   | 5      | Describe the setting, locations, and relevant dates, including periods of recruitment, exposure, follow-up, and data collection                                                      | 4                  |
| Participants              | 6      | (a) Give the eligibility criteria, and the sources and methods of selection of participants                                                                                          | 4-5                |
| Variables                 | 7      | Clearly define all outcomes, exposures, predictors, potential confounders, and effect modifiers. Give diagnostic criteria, if applicable                                             | 5-6                |
| Data sources/ measurement | 8*     | For each variable of interest, give sources of data and details of methods of assessment (measurement). Describe comparability of assessment methods if there is more than one group | 5-6                |
| Bias                      | 9      | Describe any efforts to address potential sources of bias                                                                                                                            | 4                  |
| Study size                | 10     | Explain how the study size was arrived at                                                                                                                                            | 5                  |
| Quantitative variables    | 11     | Explain how quantitative variables were handled in the analyses. If applicable, describe which groupings were chosen and why                                                         | 6                  |
| Statistical methods       | 12     | (a) Describe all statistical methods, including those used to control for confounding                                                                                                | 6                  |
|                           |        | (b) Describe any methods used to examine subgroups and interactions                                                                                                                  | 6                  |
|                           |        | (c) Explain how missing data were addressed                                                                                                                                          |                    |
|                           |        | (d) If applicable, describe analytical methods taking account of sampling strategy                                                                                                   |                    |
|                           |        | (e) Describe any sensitivity analyses                                                                                                                                                |                    |
| <b>Results</b>            |        |                                                                                                                                                                                      |                    |

|                          |     |                                                                                                                                                                                                              |            |
|--------------------------|-----|--------------------------------------------------------------------------------------------------------------------------------------------------------------------------------------------------------------|------------|
| Participants             | 13* | (a) Report numbers of individuals at each stage of study—eg numbers potentially eligible, examined for eligibility, confirmed eligible, included in the study, completing follow-up, and analysed            | 6          |
|                          |     | (b) Give reasons for non-participation at each stage                                                                                                                                                         | n/a        |
|                          |     | (c) Consider use of a flow diagram                                                                                                                                                                           |            |
| Descriptive data         | 14* | (a) Give characteristics of study participants (eg demographic, clinical, social) and information on exposures and potential confounders                                                                     | 6-7        |
|                          |     | (b) Indicate number of participants with missing data for each variable of interest                                                                                                                          |            |
| Outcome data             | 15* | Report numbers of outcome events or summary measures                                                                                                                                                         |            |
| Main results             | 16  | (a) Give unadjusted estimates and, if applicable, confounder-adjusted estimates and their precision (eg, 95% confidence interval). Make clear which confounders were adjusted for and why they were included | 7-8, 12-15 |
|                          |     | (b) Report category boundaries when continuous variables were categorized                                                                                                                                    | 5-6        |
|                          |     | (c) If relevant, consider translating estimates of relative risk into absolute risk for a meaningful time period                                                                                             | n/a        |
| Other analyses           | 17  | Report other analyses done—eg analyses of subgroups and interactions, and sensitivity analyses                                                                                                               |            |
| <b>Discussion</b>        |     |                                                                                                                                                                                                              |            |
| Key results              | 18  | Summarise key results with reference to study objectives                                                                                                                                                     | 8-10       |
| Limitations              | 19  | Discuss limitations of the study, taking into account sources of potential bias or imprecision. Discuss both direction and magnitude of any potential bias                                                   | 9-10       |
| Interpretation           | 20  | Give a cautious overall interpretation of results considering objectives, limitations, multiplicity of analyses, results from similar studies, and other relevant evidence                                   | 10         |
| Generalisability         | 21  | Discuss the generalisability (external validity) of the study results                                                                                                                                        | 9-10       |
| <b>Other information</b> |     |                                                                                                                                                                                                              |            |
| Funding                  | 22  | Give the source of funding and the role of the funders for the present study and, if applicable, for the original study on which the present article is based                                                | 1          |

\*Give information separately for cases and controls in case-control studies and, if applicable, for exposed and unexposed groups in cohort and cross-sectional studies.

**Note:** An Explanation and Elaboration article discusses each checklist item and gives methodological background and published examples of transparent reporting. The STROBE checklist is best used in conjunction with this article (freely available on the Web sites of PLoS Medicine at <http://www.plosmedicine.org/>, Annals of Internal Medicine at <http://www.annals.org/>, and Epidemiology at <http://www.epidem.com/>). Information on the STROBE Initiative is available at [www.strobe-statement.org](http://www.strobe-statement.org).

# BMJ Open

**Could changing invitation and booking processes help women translate their cervical screening intentions into action? A population-based survey of women's preferences in Great Britain.**

|                                 |                                                                                                                                                                                                                            |
|---------------------------------|----------------------------------------------------------------------------------------------------------------------------------------------------------------------------------------------------------------------------|
| Journal:                        | <i>BMJ Open</i>                                                                                                                                                                                                            |
| Manuscript ID                   | bmjopen-2018-028134.R1                                                                                                                                                                                                     |
| Article Type:                   | Research                                                                                                                                                                                                                   |
| Date Submitted by the Author:   | 10-Apr-2019                                                                                                                                                                                                                |
| Complete List of Authors:       | Ryan, Mairead; University College London Institute of Epidemiology and Health Care, Department of Behavioural Science and Health; Waller, Jo; UCL, Epidemiology and Public Health Marlow, Laura; University College London |
| <b>Primary Subject Heading</b>: | Epidemiology                                                                                                                                                                                                               |
| Secondary Subject Heading:      | Epidemiology, Communication                                                                                                                                                                                                |
| Keywords:                       | cervical cancer screening, non-participants, interventions, age, screening status, uptake                                                                                                                                  |
|                                 |                                                                                                                                                                                                                            |

SCHOLARONE™  
Manuscripts

1  
2  
3 Could changing invitation and booking processes help women translate their cervical screening  
4 intentions into action? A population-based survey of women's preferences in Great Britain.  
5  
6  
7

8 Mairead Ryan, MSc

9 Jo Waller, PhD

10 Laura A.V Marlow, PhD  
11  
12  
13  
14  
15

16 Cancer Communication and Screening Group, Research Department of Behavioural Science and  
17 Health, University College London, Gower Street, London, UK  
18  
19

20 Corresponding author contact details: Laura Marlow, l.marlow@ucl.ac.uk, 020 7679 1798.  
21  
22  
23  
24

25 MR, JW and LM are supported by a Cancer Research UK Career Development Fellowship awarded to  
26 JW (C7492/A17219).  
27  
28  
29  
30  
31  
32  
33  
34  
35  
36  
37  
38  
39  
40  
41  
42  
43  
44  
45  
46  
47  
48  
49  
50  
51  
52  
53  
54  
55  
56  
57  
58  
59  
60

## Abstract

**Objectives:** Many women who do not attend screening intend to go, but do not get around to booking an appointment. Qualitative work suggests these 'intenders' face more practical barriers to screening than women who are up-to-date ('maintainers'). This study explored practical barriers to booking a screening appointment and preferences for alternative invitation and booking methods that might overcome these barriers.

**Design:** A cross-sectional survey was employed.

**Setting:** Great Britain

**Participants:** Women aged 25 to 64, living in Great Britain who intended to be screened but were overdue ('intenders', n=255) and women who were up-to-date with screening ('maintainers', n=359)

**Results:** 'Intenders' reported slightly more barriers than 'maintainers' overall (mean = 1.36 vs 1.06,  $t=3.03$ ,  $p<0.01$ ) and were more likely to think they might forget to book an appointment (Odds ratio=2.87, 95% confidence interval: 2.01-4.09). Over half of women said they would book on a website using a smartphone (62%), a computer (58%) or via an app (52%). Older women and women from lower social grades were less likely to say they would use online booking methods (all  $ps<.05$ ). Women who reported two or more barriers were more likely to say they would use online booking than women who reported none ( $ps<.01$ ).

**Conclusions:** Women who are overdue for screening face practical barriers to booking appointments. Future interventions may assess the efficacy of changing the architecture of the invitation and booking system. This may help women overcome logistical barriers to participation and increase coverage for cervical screening.

### Strengths and limitations of this study

- This was the first study to break down the invitation and booking process into its component parts, identifying barriers at each stage of the process and alternative booking options which may help women to overcome these barriers

- Women were purposely recruited to be up-to-date and overdue, however response rate was not recorded.
- The practical barriers cited in this study relate to the booking process and are not exhaustive of all practical barriers to cervical screening. They may not reflect booking processes in other countries.

## Introduction

Cervical screening programmes are designed to reduce the incidence and mortality rate of cervical cancer.<sup>1</sup> In Great Britain all eligible women aged 25 to 64 registered with a GP are invited to be screened for the presence of abnormal cell changes in the cervix, which could, if undetected and untreated, develop into cervical cancer. The efficacy of the programme has been widely acknowledged,<sup>2</sup> however the success of any screening programme is dependent on good coverage. In 2017, coverage (i.e. the percentage of eligible women recorded as adequately screened) was 72%, well below the national target of 80% and in keeping with a trend of decreasing screening coverage.

Reasons for screening non-attendance are complex and differ depending on socio-demographic factors such as age, socio-economic status and marital status.<sup>3-6</sup> Emotional barriers including embarrassment, fear of pain and negative experiences are often reported, particularly in qualitative studies.<sup>7-9</sup> While these barriers undoubtedly need to be addressed, practical barriers have been found to be more predictive of screening status than emotional barriers.<sup>10</sup> Recent research showed that over half of women overdue for cervical screening have positive intentions to attend.<sup>11</sup> While this is encouraging, intentions are frequently not translated into action.<sup>12, 13</sup>

Weinstein used a 'messy desk' analogy to help explain the problem of translating intentions into action.<sup>14</sup> He proposed that we do not carry out errands in a logical sequence, but rather in a haphazard manner, acting on 'to-do' list items when we feel pressure, when items need to be actioned quickly, when prompted or because of personal preference. More recently, Sheeran and Webb identified three key problems (or 'TRIALS') people might encounter when trying to realise their intentions; i) they fail to get started (e.g. forget to act or miss an opportunity to act), ii) they fail to keep the goal on track (fail to monitor the goal, face competing thoughts or distractions) and iii) they fail to close (don't quite meet the goal).<sup>15</sup>

Women receive a posted letter inviting them to book a screening appointment. The letter states the recipient "can make an appointment for cervical screening by phoning (*their*) GP surgery". GP surgery hours generally coincide with 'normal' working hours, presenting several practical barriers for women who are in full-time employment or who have caring responsibilities, both in terms of

1  
2  
3 phoning and attending a GP surgery. Previous research has identified that many women find the  
4 booking process arduous and inflexible.<sup>3</sup>

5  
6  
7 Few studies have assessed alternative methods of inviting women for cervical screening.<sup>16</sup> The most  
8 recent Cochrane review of interventions to improve uptake<sup>16</sup> reported two studies from the 1980s  
9 and 90s, which found that participants who received a telephone invitation were significantly more  
10 likely to attend than those who received a letter.<sup>17, 18</sup> Studies which have examined the utility of  
11 more recent technological developments to invite women are lacking.<sup>19</sup> There is also a paucity of  
12 literature concerning alternative booking methods for cervical screening, most likely due to limited  
13 booking options being available until recently. One trial investigated the efficacy of online booking  
14 among first time invitees.<sup>20</sup> The intervention group booked slightly more appointments within three  
15 months (2.18% higher than the control group) however, this was not statistically significant.<sup>20</sup> The  
16 authors noted that the way the online booking system was offered could account for the lack of  
17 support (in a letter participants were asked to visit a website to book at one of three sexual health  
18 clinics). Hence, other forms of online booking may be desirable to women.

19  
20  
21  
22  
23  
24  
25  
26  
27  
28  
29  
30  
31  
32  
33  
34  
35  
36  
37  
38  
39  
40  
41  
42  
43  
44  
45  
46  
47  
48  
49  
50  
51  
52  
53  
54  
55  
56  
57  
58  
59  
60  
New technologies offer opportunities for editing the architecture of the invitation and booking system in ways that may help to overcome some of the challenges women face between forming a positive intention and translating this into behaviour, as highlighted in the TRIALS model. For example, online booking methods may reduce the likelihood that women would fail to get started, given that opportunities to act (i.e. book an appointment) are not limited to GP practice opening hours. The present study explored practical barriers to booking an appointment among two groups: women who are up-to-date with screening ('maintainers') and women who intend to be screened but are currently overdue ('intenders'). Our aim was to examine between-group differences which may account for this intention-behaviour gap among 'intenders'. We also assessed invitation and booking preferences and explored whether these might help to overcome practical barriers.

## Methods

### *Participants*

Participants were recruited by Kantar TNS UK as part of their omnibus survey. The TNS omnibus survey recruits a new sample of 2000-4000 men and women living in Great Britain on a weekly basis and asks questions on a range of topics commissioned by external companies. Recruitment uses random location sampling to identify areas for sampling participants using the 2011 Census and the Postcode Address File. Recruiters visit homes in the identified areas and knock on doors asking those who answer to participate. All interviews are conducted in English. Quotas are set at each location for age, gender, working status, and presence of children in the household.

1  
2  
3 Women who were eligible for cervical screening and had not previously been diagnosed with  
4 cervical cancer, were asked to report their past attendance at cervical screening and future intention  
5 to attend (see Online Supplement 1). Responses to these questions were used to classify women as  
6  
7  
8 'intenders' (intended to be screened but were currently overdue), 'maintainers' (up-to-date with  
9 screening and intending to go in the future) or 'other' (never heard of screening, never been invited,  
10 decided not to be screened). A sample of 600 women was expected to allow us to establish a  
11 significant difference of 5% between preferred booking options in the two groups of attenders  
12 within +/- 8% with 95% confidence.  
13  
14  
15

#### 16 17 *Procedure*

18  
19 Ethical approval was granted by University College London Research Ethics Committee (reference:  
20 10353/003). Data were collected between April and May 2018. Face-to-face computer-assisted  
21 personal interviews were used to collect data. Kantar TNS provided anonymised data to UCL for  
22 analysis.  
23  
24  
25

#### 26 27 *Measures*

28  
29 *Invitation preferences:* Participants were asked whether several different modes of communication  
30 were acceptable to them as a means of being invited to book a cervical screening appointment (see  
31 Online Supplement 1). Participants' responses were recoded as 'acceptable' (if they responded quite  
32 acceptable/very acceptable) or 'unacceptable' (if they responded quite unacceptable/very  
33 unacceptable/neither unacceptable nor acceptable/don't know/not applicable). Participants who  
34 responded quite/very unacceptable were asked to explain why (open response).  
35  
36  
37  
38

39  
40 *Practical barriers to booking an appointment:* Participants were asked to respond to a list of barriers,  
41 which were based on the key problems outlined in the TRIALS model.<sup>15</sup> Statements addressing the  
42 key problem of 'failing to get started' included 'It is easy for me to find time to read a letter like this'  
43 and 'I might forget to book an appointment after reading this letter'. Statements addressing 'failing  
44 to keep the goal on track' included 'It is difficult for me to call my GP practice during their opening  
45 hours' and 'I find it difficult to get through to a receptionist when I phone my GP practice'. Women  
46 were then asked to state which booking attributes were important to them, the aim of which was to  
47 address factors that might influence 'failure to close' (i.e. being able to book the appointment).  
48  
49  
50  
51  
52

53  
54 *Booking preferences:* Participants were asked to indicate how likely they would be to use different  
55 booking methods. The feasibility of these methods were informally discussed with stakeholders from  
56 the NHS national screening programme and with representatives from a technology company, who  
57 develop methods of improving access to healthcare. Participants' responses were recoded as 'likely  
58 to use' a method (if they responded quite likely/very likely) or 'not likely to use' (if they responded  
59  
60



1  
2  
3 quite unlikely/very unlikely/neither unlikely nor likely/don't know /not applicable). Participants were  
4 also asked to indicate which booking methods they had used in the past for any GP appointment.

5  
6  
7 *Socio-demographic and background factors:* Data regarding age, ethnicity, education level,  
8 employment status, marital status, social grade, child/carer responsibilities and smartphone  
9 ownership were also collected. Social grade is determined by the occupation of the Chief Income  
10 Earner in the household and is classified as follows: AB managerial/professional; C1 supervisory; C2  
11 skilled manual; D semi-skilled/unskilled manual; E casual workers/unemployed.<sup>21</sup>

#### 12 13 14 15 16 *Patient and Public Involvement Statement*

17  
18 The study was supported by a PPI group who provided input into the contents of the survey. A group  
19 of 10 screening-eligible women were invited to guide and refine the survey questions. Women who  
20 were both up-to-date and overdue were represented in the group. The group helped to establish the  
21 perceived difficulty of the questions (e.g. unknown terms, ambiguous concepts, long and overly  
22 complex questions) and omissions from the survey. The questions and response options were  
23 tailored based on feedback provided by this PPI group.

#### 24 25 26 27 28 *Analyses*

29  
30 All analyses were conducted using IBM SPSS version 22. Chi-squared analyses were conducted to  
31 test for significant differences in participant demographics between 'Intenders' and 'Maintainers'.  
32 Descriptive statistics were conducted to assess booking history and smartphone/mobile phone  
33 ownership across all participants. For each of the six practical barrier statements, any positively-  
34 framed items were reverse-scored so that a higher score was indicative of a barrier for all items.  
35 Total practical barrier scores were created by allocating a score of 1 for each barrier statement that  
36 a participant 'agreed' or 'strongly agreed' with and adding these together (possible range 0-6).  
37 Independent samples t-tests were conducted to assess differences in the mean barriers scores  
38 between 'intenders' and 'maintainers'. A series of binary logistic regressions were then conducted to  
39 assess the associations between endorsing each barrier/booking attribute and the unadjusted odds  
40 for being an 'intender' (versus a 'maintainer'). A series of univariable logistic regressions were  
41 conducted to explore whether socio-demographic factors, screening status and number of practical  
42 barriers reported were associated with invitation and booking preferences. Multivariable logistic  
43 regressions are presented as supplementary material.

#### 44 45 46 47 48 49 50 51 52 53 54 **Results**

##### 55 56 57 *Sample characteristics*

58  
59  
60

1  
2  
3 2509 eligible respondents (i.e. women aged 25-64 years) completed the Kantar TNS survey. After  
4 exclusions, 1548 (78%) were up-to-date and 445 (22%) were overdue for screening. Our questions  
5 on invitation and booking preferences for cervical screening were asked to all women who were  
6 classified as 'intenders' and women who were classified as 'maintainers' in week 1. See Online  
7 Supplement 2 for survey inclusion flow diagram.  
8  
9

10  
11  
12 Sample characteristics for participants classified as 'intenders' (n=255) and 'maintainers' (n=359) are  
13 presented in Table 1. Mean age was 41.69 years (SD=10.84, range: 25-64 years), the majority self-  
14 identified as White (89%), were employed (64%), married or co-habiting (67%) and had regular  
15 caring responsibilities (i.e. for children/parents; 63%). 'Intenders' (mean=39.41; SD=9.94) were  
16 significantly younger than 'maintainers' (mean=43.31; SD=11.16);  $t(612)=4.47, p<.001$ .  
17  
18  
19

20  
21 The majority of women had previously booked by phoning the practice (89%), over one-third had  
22 booked in person (39%) and 14% had booked on a website. 'Maintainers' were significantly more  
23 likely to have previously booked on a website than 'intenders' (see Table 1). The majority of  
24 participants had a smartphone (87%), fewer women had a mobile phone which was not a  
25 smartphone (11%) and a small minority had no mobile phone (2%).  
26  
27  
28

### 29 *Practical barriers to appointment booking and desired attributes*

30  
31  
32 Over two-thirds of women reported one or more barriers to booking (69%); mean number of  
33 reported barriers was 1.21 (SD=1.06). 'Intenders' (mean=1.36; SD=1.06) reported slightly more  
34 barriers than 'maintainers' overall (mean=1.10; SD=1.04;  $t(612)=3.03, p <0.01$ ). The most commonly  
35 endorsed barrier was 'I find it difficult to get through to a receptionist when I phone my GP practice'  
36 (50% of participants 'strongly agreed' or 'agreed'), followed by 'It is difficult for me to call my GP  
37 practice during their opening hours' (31%) and 'I might forget to book an appointment after reading  
38 this letter' (31%). Practical barriers to appointment booking and booking characteristics considered  
39 to be important are outlined in Table 2. The 'intenders' group were significantly more likely to  
40 endorse the statement 'I might forget to book an appointment after reading this letter' than  
41 'maintainers'. 'Intenders' were also more likely to state 'How long it takes to book the appointment'  
42 was important to them than 'maintainers'.  
43  
44  
45  
46  
47  
48  
49

### 50 *Invitation preferences*

51  
52 Posted letters emerged as the most acceptable invitation mode followed by text-message (see Table  
53 3). Socio-demographic predictors of the acceptability of each modality are shown in Table 3. Text-  
54 message, email and mobile call invitations were less acceptable to women aged 55-64; these  
55 associations remained significant in multivariable analyses (see Online Supplement 3). Mobile and  
56 landline call invites were more acceptable to women from lower socio-economic backgrounds and  
57  
58  
59  
60

1  
2  
3 this remained significant in multivariable analyses for mobile invites. Reasons for considering  
4 invitation modes as unacceptable are provided in Online Supplement 4; fears about missing a phone  
5 call/email or text and privacy concerns were commonly cited. Many participants also reported they  
6 had no landline phone.  
7  
8

#### 9 10 *Phone-based booking preferences*

11  
12 Most women said they were likely to book by phoning their GP practice (90%; see Table 4). Older  
13 women were significantly less likely to say they would call a 24-hour automated service than women  
14 aged 25-34 (41% vs 61%). Women with caring responsibilities were more likely to say they would  
15 request a call-back compared to women with no caring responsibilities (62% vs 49%). 'Maintainers'  
16 were less likely to say they would request a call-back than 'intenders' (63% vs 53%). These  
17 associations remained significant in multivariable analyses. Women who cited three or more barriers  
18 were more likely to say they would call a 24-hour automated service but this association was not  
19 significant in multivariable analyses.  
20  
21

#### 22 23 *Online booking preferences*

24  
25 Booking on a website using a smartphone (62%) was the preferred online booking method (see  
26 Table 5). Older women (55-64 years) were less likely to say they would book online than younger  
27 women (25-34 years). Women in lower social grades were less likely than women in the highest  
28 grade to state they would book on a website, either using a desktop or smartphone. Participants  
29 who were studying or retired were less likely than those employed to say they would book online  
30 (either on a website using a smartphone: 41% vs 65%, or through an app: 24% vs 56%). Women who  
31 reported two or more barriers were more likely to report that they would use all online booking  
32 methods compared to women who reported no barriers (see Table 5). Age, social grade,  
33 employment status and number of barriers remained significant in multivariable analyses.  
34  
35  
36  
37  
38  
39  
40  
41  
42  
43  
44  
45

#### 46 **Discussion**

47 This study examined women's practical barriers to booking a cervical screening appointment and  
48 assessed whether invitation and booking preferences are associated with reported barriers, socio-  
49 demographic factors and screening status. Approximately one-third of all women reported that it is  
50 difficult to phone their GP practice within opening hours and half reported that it is difficult to get  
51 through to a receptionist. Although the survey found that 'intenders' experience slightly more  
52 practical barriers to screening than 'maintainers', endorsement of barriers across the sample  
53 suggests that both groups need more support in booking an appointment.  
54  
55  
56  
57  
58  
59  
60

1  
2  
3 'Intenders' were more likely to report that they would forget to book an appointment after reading  
4 the screening letter than 'maintainers'. This key problem relates to a 'failure to get started', which is  
5 a first barrier people face between forming an intention and translating this into behaviour.<sup>15</sup>  
6  
7  
8 Written reminders are an integral part of the screening programme and there is good evidence to  
9 show these improve uptake,<sup>16</sup> but in their current format these reminders do not seem to help all  
10 women to remember to book their appointment. Future research might explore methods of  
11 increasing the salience of cervical screening among invitees (e.g. employing implementation  
12 intentions).<sup>22</sup> The use of text-message reminders has shown promise in other screening contexts.<sup>23</sup>  
13  
14  
15 'Intenders' were also more likely to say that the length of time needed to book an appointment was  
16 important to them. Since all women eligible for cervical screening fall within the working age  
17 population, and GP opening hours generally overlap with working hours, it is likely this cohort face  
18 competing obligations,<sup>24</sup> and, as a result 'fail to keep their goal on track'.<sup>15</sup> The rate of female  
19 employment (16 to 64 years) has increased from 62.2% in 1994, when coverage was high (85%; five  
20 yearly coverage for women aged 20 to 64)<sup>25</sup> to 70.5% in 2017.<sup>26</sup> Alternative booking methods may  
21 provide more flexibility.  
22  
23  
24  
25  
26  
27  
28  
29

30 Women who reported more barriers showed greater interest in using alternative booking methods.  
31 Specifically, participants who reported two or more barriers were more likely to say that they would  
32 book on a website or through an app. This is perhaps not surprising since these methods overcome  
33 the most common practical barriers highlighted by participants, including, difficulty getting through  
34 to a receptionist and difficulty calling the practice during opening hours; hence they 'fail to close'.  
35 Nevertheless, while 24-hour automated services offers these same advantages, consistent with  
36 previous national surveys,<sup>27</sup> fewer women reported that they would use this booking option. Online  
37 booking services are already set up in the majority of GP practices across England for GP  
38 appointments, however a national survey found that over 40% of patients are unaware if there are  
39 online booking services at their GP practice.<sup>28</sup> Hence, signposting online booking services, if  
40 available for nurse appointments, to groups of the screening-eligible population (i.e. younger  
41 women who are more likely to be 'intenders') may be an effective means of increasing uptake. This  
42 survey suggests that there are likely to be age and socio-economic inequalities in the use of online  
43 bookings. For example, women aged 45-54 years and women age 55-64 showed less interest in  
44 using online booking methods. Thus, ensuring that traditional telephone booking options remains  
45 available is important.  
46  
47  
48  
49  
50  
51  
52  
53  
54  
55  
56  
57  
58  
59  
60

1  
2  
3 Previous research has found that it is very difficult for individuals to maintain intentions after even  
4 very brief periods of time (less than one minute), especially in circumstances where there are  
5 competing tasks.<sup>29</sup> Unlike posted letters, which may not be read until the end of the day, text-  
6 messages can be delivered at a time when GP practices are open, so women can act immediately on  
7 their intentions to book an appointment. Given that text-message invites were considered  
8 acceptable to the majority of women across all socio-demographic backgrounds, and have  
9 previously been found to be effective in increasing uptake for other national screening  
10 programmes,<sup>23</sup> the use of text-message invitations may be a worthwhile intervention to explore.  
11 Text-messages within the cervical screening programme have, thus far, been introduced as a  
12 booking reminder, rather than as a stand-alone invitation, which the current study did not specify.  
13 Some participants shared concerns that they may miss the message; outlining that text-messages  
14 would be used as a supplemental invitation may have further increased acceptability within the  
15 sample. Further research is needed to explore methods of overcoming privacy concerns associated  
16 with text-messages, which some of the participants raised.

17  
18  
19  
20  
21  
22  
23  
24  
25  
26  
27  
28 This study had some limitations. We were unable to collect data on women who elected not to  
29 participate in the study. Hence the response rate and differences between respondents and non-  
30 respondents could not be determined. Women in the survey tended to be slightly less deprived and  
31 were less likely to be from ethnic minority backgrounds than the population represented in the most  
32 recent Census.<sup>30</sup> This suggests there was a slight bias in participation. This survey was also conducted  
33 in English and therefore non-English speakers were not represented. Given ethnic disparities in  
34 screening attendance in England,<sup>31</sup> more work is needed to explore methods of overcoming practical  
35 barriers to screening for ethnic minority women.

36  
37  
38  
39  
40  
41  
42  
43 Participation in screening was self-reported. Previous research has found that women tend to over-  
44 report their participation in cervical screening programmes,<sup>32, 33</sup> thus some of the women classified  
45 as 'maintainers' may actually be overdue for screening. Furthermore, although this study explored  
46 practical barriers to appointment-booking based on the TRIALS model,<sup>15</sup> several other practical  
47 barriers were not assessed. For example, previous research has found that 'intenders' are more  
48 likely to have children under the age of five;<sup>11</sup> childcare may be an additional practical barrier to  
49 screening. Thus the barriers cited in this study are not exhaustive of all practical barriers to screening  
50 for women. In addition, the study was designed to reflect the current booking process for cervical  
51 screening in Great Britain. While there may be parallels with other countries that have call-recall  
52 programs with paper-based invitations and self-booked appointments in primary care, the findings  
53  
54  
55  
56  
57  
58  
59  
60

1  
2  
3 may not be generalisable to screening programmes in other countries, where the invitation and  
4 booking approach differs.  
5  
6  
7

8 Nevertheless, this was the first study to assess preferences for booking a screening appointment in  
9 Great Britain, an important first step in the development of trialling and implementing any of these  
10 changes. The invitation and booking process was broken down to identify barriers at each stage and  
11 associated preferences which may help women to overcome such barriers. The lack of differences by  
12 screening status suggests that changing the architecture should not deter 'maintainers' from  
13 participation. Future interventions may assess the efficacy of i) signposting invitees to online  
14 booking services, ii) text-messages which are delivered during GP opening hours and iii) sending  
15 reminders to reduce the likelihood of forgetting to book an appointment. Implementation research  
16 will further determine how best to introduce such changes to the screening infrastructure.  
17  
18  
19  
20  
21  
22  
23  
24  
25  
26  
27  
28  
29  
30  
31  
32  
33  
34  
35  
36  
37  
38  
39  
40  
41  
42  
43  
44  
45  
46  
47  
48  
49  
50  
51  
52  
53  
54  
55  
56  
57  
58  
59  
60

Table 1:

*Sample Characteristics (n=614)*

|                                 | Overall<br>(n=614) | Maintainers<br>(n=359) | Intenders<br>(n=255) | Difference between<br>maintainers and intenders |
|---------------------------------|--------------------|------------------------|----------------------|-------------------------------------------------|
|                                 | N (%)              | N (%)                  | N (%)                | Chi Square (df), P-value                        |
| <b>Age (years)</b>              |                    |                        |                      | 14.16 (3), <.001                                |
| 25-34                           | 192 (31.3)         | 103 (28.7)             | 89 (34.9)            |                                                 |
| 35-44                           | 183 (29.8)         | 95 (26.5)              | 88 (34.5)            |                                                 |
| 45-54                           | 137 (22.3)         | 88 (24.5)              | 49 (19.2)            |                                                 |
| 55-64                           | 102 (16.6)         | 73 (20.3)              | 29 (11.4)            |                                                 |
| <b>Ethnicity</b>                |                    |                        |                      | 0.10 (1), 0.76                                  |
| Any white                       | 547 (89.1)         | 321 (89.4)             | 226 (88.6)           |                                                 |
| All other groups                | 67 (10.9)          | 38 (10.6)              | 29 (11.4)            |                                                 |
| <b>Education level</b>          |                    |                        |                      | 2.12 (4), 0.71                                  |
| GCSE or below                   | 180 (29.3)         | 108 (30.1)             | 72 (28.2)            |                                                 |
| A level or equivalent           | 71 (11.6)          | 45 (12.5)              | 26 (10.2)            |                                                 |
| College qualification           | 115 (18.7)         | 62 (17.3)              | 53 (20.8)            |                                                 |
| Degree or higher                | 213 (34.7)         | 125 (34.8)             | 88 (34.5)            |                                                 |
| Other                           | 35 (5.7)           | 19 (5.3)               | 16 (6.3)             |                                                 |
| <b>Employment status</b>        |                    |                        |                      | 3.19 (2), 0.20                                  |
| Employed (full-time/part-time)  | 392 (63.8)         | 234 (65.2)             | 158 (62.0)           |                                                 |
| Unemployed                      | 182 (29.6)         | 98 (27.3)              | 84 (32.9)            |                                                 |
| Other (studying/retired)        | 40 (6.5)           | 27 (7.5)               | 13 (5.1)             |                                                 |
| <b>Marital status</b>           |                    |                        |                      | 2.89 (2), 0.24                                  |
| Single                          | 129 (21.0)         | 67 (18.7)              | 62 (24.3)            |                                                 |
| Married/living as married       | 413 (67.3)         | 249 (69.4)             | 164 (64.3)           |                                                 |
| Widowed/divorced/separated      | 72 (11.7)          | 43 (12.0)              | 29 (11.4)            |                                                 |
| <b>Parent/carer role</b>        |                    |                        |                      | 0.62 (0.45), 0.43                               |
| Yes                             | 387 (63.0)         | 221 (61.6)             | 166 (65.1)           |                                                 |
| No                              | 222 (36.2)         | 134 (37.3)             | 88 (34.5)            |                                                 |
| <b>Social status</b>            |                    |                        |                      | 7.93 (4), 0.09                                  |
| AB (highest)                    | 134 (21.8)         | 90 (25.1)              | 44 (17.3)            |                                                 |
| C1                              | 157 (25.6)         | 88 (24.5)              | 69 (27.1)            |                                                 |
| C2                              | 142 (23.1)         | 84 (23.4)              | 58 (22.7)            |                                                 |
| D                               | 93 (15.1)          | 54 (15.0)              | 39 (15.3)            |                                                 |
| E (lowest)                      | 88 (14.3)          | 43 (12.0)              | 45 (17.6)            |                                                 |
| <b>Booking history (Yes/No)</b> |                    |                        |                      |                                                 |
| Phoned the practice             | 545 (88.8)         | 316 (88.0)             | 229 (89.8)           | 0.47 (1), 0.49                                  |
| At reception (in person)        | 240 (39.1)         | 145 (40.4)             | 95 (37.3)            | 0.62 (1), 0.43                                  |
| 24-hr automated service         | 23 (3.7)           | 14 (3.9)               | 9 (3.5)              | 0.06 (1), 0.81                                  |
| Text-message                    | 7 (1.1)            | 4 (1.1)                | 3 (1.2)              | 0.01 (1), 0.94                                  |
| Website                         | 85 (13.8)          | 60 (16.7)              | 25 (9.8)             | 5.97 (1), <.05                                  |
| Smartphone app                  | 23 (3.7)           | 15 (4.2)               | 8 (3.1)              | 0.45 (1), 0.50                                  |
| <b>Phone ownership</b>          |                    |                        |                      | 0.72 (2), 0.70                                  |
| Smartphone                      | 533 (86.8)         | 315 (87.7)             | 218 (85.5)           |                                                 |
| Non-smartphone mobile           | 67 (10.9)          | 36 (10.0)              | 31 (12.2)            |                                                 |
| No phone                        | 14 (2.3)           | 8 (2.2)                | 6 (2.4)              |                                                 |

Table 2:

Practical barriers to appointment booking and booking characteristics considered to be important (n=614)

|                                                                                                        | All<br>(n=614)<br>N (%) | 'Maintainers'<br>(n=359)<br>N (%) | 'Intenders'<br>(n=255)<br>N (%) | OR for being<br>an 'intender' (95% CI) |
|--------------------------------------------------------------------------------------------------------|-------------------------|-----------------------------------|---------------------------------|----------------------------------------|
| <b>Practical barriers to booking screening (% agree/strongly agree)</b>                                |                         |                                   |                                 |                                        |
| It is ( <i>not</i> ) easy for me to find time to read a letter like this                               | 25 (4.1)                | 15 (4.2)                          | 10 (3.9)                        | 0.94 (0.41-2.12)                       |
| I might forget to book an appointment after reading this letter                                        | 187 (30.5)              | 76 (21.2)                         | 111 (43.5)                      | 2.87 (2.01-4.09)**                     |
| It is difficult for me to call my GP practice during their opening hours                               | 192 (31.3)              | 108 (30.1)                        | 84 (32.9)                       | 1.14 (0.81-1.61)                       |
| I ( <i>do not</i> ) have access to a telephone/mobile with phone credit/minutes to call my GP practice | 13 (2.1)                | 8 (2.2)                           | 5 (2.0)                         | 0.88 (0.28-2.71)                       |
| I would ( <i>not</i> ) find it easy to find the phone number for my GP practice to contact them        | 19 (3.1)                | 11 (3.1)                          | 8 (3.1)                         | 1.01 (0.41-2.59)                       |
| I find it difficult to get through to a receptionist when I phone my GP practice                       | 306 (49.8)              | 177 (49.3)                        | 129 (50.6)                      | 1.05 (0.76-1.45)                       |
| <b>Booking attributes (% saying quite/very important)</b>                                              |                         |                                   |                                 |                                        |
| Ease of booking                                                                                        | 519 (84.5)              | 305 (85.0)                        | 214 (83.9)                      | 0.92 (0.59-1.44)                       |
| Choice of appointments                                                                                 | 486 (79.2)              | 280 (78.0)                        | 206 (80.8)                      | 1.19 (0.83-1.77)                       |
| Being able to change an appointment after booking                                                      | 474 (77.2)              | 274 (76.3)                        | 200 (78.4)                      | 1.13 (0.77-1.66)                       |
| How long it takes to book appointment                                                                  | 424 (69.1)              | 235 (65.5)                        | 189 (74.1)                      | 1.51 (1.06-2.15)*                      |
| Waiting time for next available appointment                                                            | 428 (69.7)              | 245 (68.2)                        | 183 (71.8)                      | 1.18 (0.83-1.68)                       |
| Privacy when booking appointment                                                                       | 410 (66.8)              | 230 (64.1)                        | 180 (70.6)                      | 1.35 (0.95-1.90)                       |
| Being able to talk with a healthcare professional when booking                                         | 345 (56.2)              | 195 (54.3)                        | 150 (58.8)                      | 1.20 (0.87-1.66)                       |
| Being able to book an appointment when the GP practice is shut                                         | 284 (46.3)              | 173 (48.2)                        | 111 (43.5)                      | 0.83 (0.60-1.15) <sup>a</sup>          |
| Cost of making booking (i.e. phone credit)                                                             | 166 (27.0)              | 94 (26.2)                         | 72 (28.2)                       | 1.11 (0.77-1.59)                       |

Note. OR= odds ratio; CI= confidence interval; \*p<0.05, \*\*p<0.001, <sup>a</sup>30% missing data for this variable



Table 3:

Univariable logistic regression models of predictors of the acceptability of cervical screening invitation modalities (n=614)

|                                | Posted letter |                   | Text-message |                     | Email |                     | Mobile phone call |                     | Landline phone call |                    |
|--------------------------------|---------------|-------------------|--------------|---------------------|-------|---------------------|-------------------|---------------------|---------------------|--------------------|
|                                | %             | OR (95% CI)       | %            | OR (95% CI)         | %     | OR (95% CI)         | %                 | OR (95% CI)         | %                   | OR (95% CI)        |
| <b>All participants</b>        | 90.1          | 1.00              | 78.5         | 1.00                | 72.5  | 1.00                | 73.8              | 1.00                | 58.5                | 1.00               |
| <b>Age group</b>               |               |                   |              |                     |       |                     |                   |                     |                     |                    |
| 25-34                          | 92.2          | 1.00              | 86.7         | 1.00                | 80.9  | 1.00                | 82.4              | 1.00                | 65.0                | 1.00               |
| 35-44                          | 89.1          | 0.69 (0.34-1.39)  | 84.2         | 0.78 (0.45-1.34)    | 78.2  | 0.76 (0.47-1.23)    | 80.8              | 0.85 (0.52-1.41)    | 67.5                | 1.06 (0.70-1.61)   |
| 45-54                          | 86.9          | 0.56 (0.27-1.16)  | 78.7         | 0.64 (0.36-1.12)    | 74.1  | 0.71 (0.43-1.19)    | 69.1              | 0.52 (0.31-0.87)*   | 53.4                | 0.67 (0.43-1.04)   |
| 55-64                          | 92.2          | 1.00 (0.41-2.43)  | 65.6         | 0.29 (0.16-0.50)*** | 60.0  | 0.33 (0.20-0.56)*** | 62.9              | 0.36 (0.21-0.61)*** | 60.4                | 0.85 (0.52-1.38)   |
| <b>Social grade</b>            |               |                   |              |                     |       |                     |                   |                     |                     |                    |
| AB                             | 89.6          | 1.00              | 76.1         | 1.00                | 77.6  | 1.00                | 62.7              | 1.00                | 49.3                | 1.00               |
| C1                             | 85.4          | 0.68 (0.34-1.38)  | 77.1         | 1.05 (0.61-1.82)    | 73.2  | 0.79 (0.46-1.35)    | 67.5              | 1.24 (0.76-2.01)    | 51.6                | 1.10 (0.69-1.74)   |
| C2                             | 96.5          | 3.20 (1.12-9.14)* | 78.9         | 1.17 (0.67-2.06)    | 72.5  | 0.76 (0.44-1.32)    | 82.4              | 2.79 (1.60-4.86)*** | 65.5                | 1.96 (1.21-3.17)** |
| D                              | 93.5          | 1.69 (0.63-4.58)  | 84.9         | 1.77 (0.89-3.54)    | 77.4  | 0.99 (0.53-1.86)    | 77.4              | 2.04 (1.12-3.72)*   | 63.4                | 1.79 (1.04-3.07)*  |
| E                              | 85.2          | 0.67 (0.30-1.51)  | 77.3         | 1.07 (0.56-2.02)    | 58.0  | 0.40 (0.22-0.72)**  | 84.1              | 3.15 (1.61-6.15)**  | 68.2                | 2.01 (1.26-3.87)** |
| <b>Employment</b>              |               |                   |              |                     |       |                     |                   |                     |                     |                    |
| Employed                       | 91.1          | 1.00              | 78.8         | 1.00                | 76.0  | 1.00                | 72.4              | 1.00                | 55.1                | 1.00               |
| Unemployed                     | 86.8          | 0.65 (0.37-1.12)  | 79.7         | 1.05 (0.68-1.63)    | 67.0  | 0.64 (0.44-0.94)*   | 80.8              | 1.60 (1.04-2.46)*   | 66.5                | 1.62 (1.12-2.33)*  |
| Other (studying/retired)       | 95.0          | 1.86 (0.43-8.05)  | 70.0         | 0.63 (0.61-1.29)    | 62.5  | 0.53 (0.27-1.04)    | 55.0              | 0.47 (0.24-0.90)*   | 55.0                | 0.99 (0.52-1.92)   |
| <b>Ethnicity</b>               |               |                   |              |                     |       |                     |                   |                     |                     |                    |
| Any white                      | 91.0          | 1.00              | 77.7         | 1.00                | 71.1  | 1.00                | 73.1              | 1.00                | 57.6                | 1.00               |
| All other groups               | 82.1          | 0.45 (0.23-0.90)* | 85.1         | 1.64 (0.81-3.30)    | 83.6  | 2.07 (1.06-4.05)*   | 79.1              | 1.39 (0.75-2.58)    | 65.7                | 1.41 (0.83-2.40)   |
| <b>Caring responsibilities</b> |               |                   |              |                     |       |                     |                   |                     |                     |                    |
| No                             | 89.2          | 1.00              | 75.2         | 1.00                | 68.9  | 1.00                | 66.2              | 1.00                | 55.0                | 1.00               |
| Yes                            | 91.5          | 1.30 (0.75-2.26)  | 81.1         | 1.42 (0.95-2.11)    | 75.2  | 1.37 (0.95-1.97)    | 78.8              | 1.90 (1.31-2.75)**  | 61.0                | 1.28 (0.92-1.79)   |
| <b>Screening status</b>        |               |                   |              |                     |       |                     |                   |                     |                     |                    |
| Intender                       | 88.6          | 1.00              | 79.6         | 1.00                | 72.2  | 1.00                | 74.1              | 1.00                | 58.0                | 1.00               |
| Maintainer                     | 91.1          | 1.31 (0.77-2.23)  | 77.7         | 0.89 (0.60-1.32)    | 72.7  | 1.03 (0.72-1.47)    | 73.5              | 0.97 (0.67-1.40)    | 58.8                | 1.03 (0.74-1.43)   |
| <b>Practical barriers</b>      |               |                   |              |                     |       |                     |                   |                     |                     |                    |
| 0 barriers                     | 89.6          | 1.00              | 77.2         | 1.00                | 68.9  | 1.00                | 73.6              | 1.00                | 56.0                | 1.00               |
| 1 barrier                      | 93.2          | 1.57 (0.76-3.26)  | 77.9         | 1.04 (0.64-1.68)    | 72.1  | 1.17 (0.75-1.81)    | 74.7              | 1.06 (0.67-1.68)    | 57.9                | 1.08 (0.72-1.62)   |
| 2 barriers                     | 90.7          | 1.12 (0.55-2.31)  | 80.0         | 1.18 (0.70-1.99)    | 74.7  | 1.33 (0.83-2.14)    | 72.7              | 0.96 (0.59-1.55)    | 60.7                | 1.21 (0.79-1.87)   |
| 3 or more barriers             | 82.7          | 0.55 (0.26-1.16)  | 80.2         | 1.20 (0.63-2.28)    | 77.8  | 1.58 (0.86-2.89)    | 74.1              | 1.03 (0.57-1.85)    | 61.7                | 1.27 (0.75-2.16)   |

Note. OR= unadjusted odds ratio; CI= confidence interval; \*p<0.05, \*\*p<0.01, \*\*\*p<0.005

Table 4

Univariable logistic regression models of predictors of phone-based booking preferences (n=614)

|                                | Calling the GP        |                  | Calling a 24-hour automated service |                    | Requesting a call-back |                    |
|--------------------------------|-----------------------|------------------|-------------------------------------|--------------------|------------------------|--------------------|
|                                | % likely to book by.. | OR (95% CI)      | % likely to book by..               | OR (95% CI)        | % likely to book by..  | OR (95% CI)        |
| <b>All participants</b>        | 89.6                  | 1.00             | 51.6                                | 1.00               | 57.0                   | 1.00               |
| <b>Age group</b>               |                       |                  |                                     |                    |                        |                    |
| 25-34                          | 90.6                  | 1.00             | 60.9                                | 1.00               | 59.4                   | 1.00               |
| 35-44                          | 89.6                  | 0.89 (0.45-1.76) | 53.0                                | 0.73 (0.48-1.09)   | 61.7                   | 1.11 (0.73-1.67)   |
| 45-54                          | 89.1                  | 0.84 (0.41-1.73) | 44.5                                | 0.52 (0.33-0.80)** | 48.2                   | 0.64 (0.41-0.99)*  |
| 55-64                          | 88.2                  | 0.78 (0.36-1.68) | 41.2                                | 0.45 (0.28-0.73)** | 55.9                   | 0.87 (0.53-1.41)   |
| <b>Social grade</b>            |                       |                  |                                     |                    |                        |                    |
| AB                             | 88.8                  | 1.00             | 50.0                                | 1.00               | 53.7                   | 1.00               |
| C1                             | 86.0                  | 0.77 (0.38-1.56) | 49.0                                | 0.96 (0.61-1.53)   | 49.0                   | 0.83 (0.52-1.32)   |
| C2                             | 93.0                  | 1.66 (0.72-3.85) | 58.5                                | 1.41 (0.87-2.26)   | 59.9                   | 1.28 (0.80-2.07)   |
| D                              | 92.5                  | 1.55 (0.61-3.96) | 52.7                                | 1.11 (0.66-1.89)   | 63.4                   | 1.49 (0.87-2.57)   |
| E                              | 88.6                  | 0.98 (0.42-2.30) | 46.6                                | 0.87 (0.51-1.50)   | 64.8                   | 1.58 (0.91-2.76)   |
| <b>Employment</b>              |                       |                  |                                     |                    |                        |                    |
| Employed                       | 89.8                  | 1.00             | 52.8                                | 1.00               | 55.9                   | 1.00               |
| Unemployed                     | 89.6                  | 0.98 (0.55-1.74) | 50.0                                | 0.89 (0.63-1.27)   | 61.5                   | 1.26 (0.88-1.81)   |
| Other (studying/retired)       | 87.5                  | 0.80 (0.30-2.15) | 47.5                                | 0.81 (0.42-1.55)   | 47.5                   | 0.72 (0.37-1.37)   |
| <b>Ethnicity</b>               |                       |                  |                                     |                    |                        |                    |
| Any white                      | 89.8                  | 1.00             | 50.3                                | 1.00               | 56.3                   | 1.00               |
| All other groups               | 88.1                  | 0.84 (0.38-1.85) | 62.7                                | 1.66 (0.97-2.80)   | 62.7                   | 1.30 (0.77-2.20)   |
| <b>Caring responsibilities</b> |                       |                  |                                     |                    |                        |                    |
| No                             | 89.6                  | 1.00             | 50.9                                | 1.00               | 49.1                   | 1.00               |
| Yes                            | 90.7                  | 1.13 (0.65-1.96) | 52.7                                | 1.08 (0.77-1.50)   | 62.3                   | 1.71 (1.23-2.39)** |
| <b>Screening status</b>        |                       |                  |                                     |                    |                        |                    |
| Intender                       | 87.8                  | 1.00             | 53.7                                | 1.00               | 63.1                   | 1.00               |
| Maintainer                     | 90.8                  | 1.37 (0.81-2.30) | 50.1                                | 0.87 (0.63-1.20)   | 52.6                   | 0.65 (0.47-0.90)*  |
| <b>Practical barriers</b>      |                       |                  |                                     |                    |                        |                    |
| 0 barriers                     | 87.6                  | 1.00             | 47.2                                | 1.00               | 53.4                   | 1.00               |
| 1 barrier                      | 92.6                  | 1.79 (0.89-3.57) | 47.9                                | 1.03 (0.69-1.54)   | 53.2                   | 0.99 (0.66-1.48)   |
| 2 barriers                     | 92.0                  | 1.63 (0.79-3.37) | 56.7                                | 1.47 (0.95-2.25)   | 62.7                   | 1.47 (0.95-2.27)   |
| 3 or more barriers cited       | 82.7                  | 0.68 (0.33-1.39) | 63.0                                | 1.81 (1.06-3.07)*  | 61.7                   | 1.57 (0.92-2.68)   |

Note. OR= unadjusted odds ratio; CI= confidence interval; \*p&lt;0.05, \*\*p&lt;0.01, \*\*\*p&lt;0.001

Table 5

Univariable logistic regression models of predictors of online booking preferences (n=614)

|                                | Booking on a website using a desktop/laptop |                     | Booking on a website using a smartphone <sup>a</sup> |                     | Downloading an app to your smartphone <sup>a</sup> |                     |
|--------------------------------|---------------------------------------------|---------------------|------------------------------------------------------|---------------------|----------------------------------------------------|---------------------|
|                                | % likely to book by..                       | OR (95% CI)         | % likely to book by..                                | OR (95% CI)         | % likely to book by..                              | OR (95% CI)         |
| <b>All participants</b>        | 57.8                                        | 1.00                | 61.5                                                 | 1.00                | 51.8                                               | 1.00                |
| <b>Age group</b>               |                                             |                     |                                                      |                     |                                                    |                     |
| 25-34                          | 67.7                                        | 1.00                | 71.9                                                 | 1.00                | 64.9                                               | 1.00                |
| 35-44                          | 59.6                                        | 0.70 (0.46-1.07)    | 64.6                                                 | 0.72 (0.45-1.12)    | 53.7                                               | 0.63 (0.41-0.97)*   |
| 45-54                          | 54.0                                        | 0.56 (0.36-0.88)*   | 53.1                                                 | 0.44 (0.27-0.72)**  | 42.5                                               | 0.40 (0.25-0.65)*** |
| 55-64                          | 41.2                                        | 0.33 (0.20-0.55)*** | 40.8                                                 | 0.27 (0.15-0.48)*** | 28.2                                               | 0.21 (0.12-0.39)*** |
| <b>Social grade</b>            |                                             |                     |                                                      |                     |                                                    |                     |
| AB                             | 70.1                                        | 1.00                | 71.4                                                 | 1.00                | 54.8                                               | 1.00                |
| C1                             | 56.1                                        | 0.54 (0.33-0.88)    | 61.0                                                 | 0.63 (0.37-1.05)    | 51.1                                               | 0.86 (0.53-1.40)    |
| C2                             | 58.5                                        | 0.60 (0.36-0.99)*   | 59.8                                                 | 0.60 (0.35-1.01)    | 54.9                                               | 1.01 (0.61-1.66)    |
| D                              | 57.0                                        | 0.56 (0.32-0.98)*   | 56.6                                                 | 0.52 (0.29-0.93)*   | 48.2                                               | 0.77 (0.44-1.34)    |
| E                              | 42.0                                        | 0.31 (0.18-0.54)*** | 52.5                                                 | 0.44 (0.23-0.83)*   | 45.9                                               | 0.70 (0.38-1.30)    |
| <b>Employment</b>              |                                             |                     |                                                      |                     |                                                    |                     |
| Employed                       | 62.5                                        | 1.00                | 65.4                                                 | 1.00                | 55.6                                               | 1.00                |
| Unemployed                     | 50.0                                        | 0.60 (0.41-0.86)**  | 56.1                                                 | 0.67 (0.46-1.00)*   | 48.0                                               | 0.74 (0.50-1.08)    |
| Other (studying/retired)       | 47.5                                        | 0.54 (0.28-1.04)    | 41.4                                                 | 0.37 (0.17-0.81)*   | 24.1                                               | 0.25 (0.11-0.61)**  |
| <b>Ethnicity</b>               |                                             |                     |                                                      |                     |                                                    |                     |
| Any white                      | 57.4                                        | 1.00                | 61.1                                                 | 1.00                | 51.5                                               | 1.00                |
| All other groups               | 61.2                                        | 1.17 (0.70-1.97)    | 65.1                                                 | 1.19 (0.69-2.06)    | 54.0                                               | 1.11 (0.65-1.87)    |
| <b>Caring responsibilities</b> |                                             |                     |                                                      |                     |                                                    |                     |
| No                             | 58.1                                        | 1.00                | 59.0                                                 | 1.00                | 46.4                                               | 1.00                |
| Yes                            | 58.4                                        | 1.01 (0.72-1.41)    | 63.8                                                 | 1.22 (0.85-1.77)    | 55.4                                               | 1.43 (1.00-2.05)    |
| <b>Screening status</b>        |                                             |                     |                                                      |                     |                                                    |                     |
| Intender                       | 57.3                                        | 1.00                | 62.4                                                 | 1.00                | 56.0                                               | 1.00                |
| Maintainer                     | 58.2                                        | 1.04 (0.75-1.44)    | 61.0                                                 | 0.94 (0.66-1.34)    | 48.9                                               | 0.75 (0.53-1.07)    |
| <b>Practical barriers</b>      |                                             |                     |                                                      |                     |                                                    |                     |
| 0 barriers                     | 47.7                                        | 1.00                | 50.6                                                 | 1.00                | 40.4                                               | 1.00                |
| 1 barrier                      | 58.4                                        | 1.54 (1.03-2.31)*   | 61.3                                                 | 1.54 (1.00-2.40)    | 51.2                                               | 1.55 (1.00-2.41)*   |
| 2 barriers                     | 64.7                                        | 2.01 (1.30-3.11)**  | 68.9                                                 | 2.17 (1.34-3.50)**  | 59.8                                               | 2.20 (1.38-3.51)**  |
| 3 or more barriers             | 64.2                                        | 2.32 (1.35-4.01)**  | 73.3                                                 | 2.69 (1.48-4.87)**  | 64.0                                               | 2.63 (1.49-4.62)**  |

Note. OR= unadjusted odds ratio; CI= confidence interval; \*p<0.05, \*\*p<0.01, \*\*\*p<0.001, <sup>a</sup> participants with no smartphone removed from analyses (n = 81)

1  
2  
3 Contributorship statement

4 MR (Conceptualisation; Data analysis; Project administration; Writing – original draft; Writing –  
5 review & editing)

6  
7  
8 JW (Conceptualisation; Supervision; Writing – review & editing)

9 LM (Conceptualisation; Data analysis; Supervision; Writing – review & editing)

10 All authors approved the final manuscript as submitted.  
11  
12  
13

14  
15 Competing interests

16 The authors have no competing interests to declare.  
17  
18  
19

20 Funding

21 MR, JW and LM are supported by a Cancer Research UK Career Development Fellowship awarded to  
22 JW (C7492/A17219).  
23  
24  
25

26 Data sharing statement

27 Data used and analysed in the study are available from the corresponding author on request  
28 (l.marlow@ucl.ac.uk).  
29  
30  
31  
32

33 The Corresponding Author has the right to grant on behalf of all authors and does grant on behalf of  
34 all authors, a worldwide licence to the Publishers and its licensees in perpetuity, in all forms, formats  
35 and media (whether known now or created in the future), to i) publish, reproduce, distribute, display  
36 and store the Contribution, ii) translate the Contribution into other languages, create adaptations,  
37 reprints, include within collections and create summaries, extracts and/or, abstracts of the  
38 Contribution, iii) create any other derivative work(s) based on the Contribution, iv) to exploit all  
39 subsidiary rights in the Contribution, v) the inclusion of electronic links from the Contribution to  
40 third party material where-ever it may be located; and, vi) licence any third party to do any or all of  
41 the above.  
42  
43  
44  
45  
46  
47  
48  
49  
50  
51  
52  
53  
54  
55  
56  
57  
58  
59  
60

## References

1. NHS. Cervical Screening Programme, England 2016-17, National Statistics. In: Screening & Immunisations Team ND, (ed.). 2017.
2. Landy R, Pesola F, Castanon A, et al. Impact of cervical screening on cervical cancer mortality: estimation using stage-specific results from a nested case-control study. *British journal of cancer* 2016; 115: 1140-1146. 2016/10/26. DOI: 10.1038/bjc.2016.290.
3. Waller J, Jackowska M, Marlow L, et al. Exploring age differences in reasons for nonattendance for cervical screening: a qualitative study. *BJOG : an international journal of obstetrics and gynaecology* 2012; 119: 26-32. 2011/06/15. DOI: 10.1111/j.1471-0528.2011.03030.x.
4. Hope KA, Moss E, Redman CWE, et al. Psycho-social influences upon older women's decision to attend cervical screening: A review of current evidence. *Prev Med* 2017; 101: 60-66. 2017/05/16. DOI: 10.1016/j.ypmed.2017.05.002.
5. Douglas E, Waller J, Duffy SW, et al. Socioeconomic inequalities in breast and cervical screening coverage in England: are we closing the gap? *Journal of medical screening* 2016; 23: 98-103. 2015/09/18. DOI: 10.1177/0969141315600192.
6. Spencer AM, Roberts SA, Brabin L, et al. Sociodemographic factors predicting mother's cervical screening and daughter's HPV vaccination uptake. *Journal of epidemiology and community health* 2014; 68: 571-577. 2014/02/26. DOI: 10.1136/jech-2013-202629.
7. Sutton S and Rutherford C. Sociodemographic and attitudinal correlates of cervical screening uptake in a national sample of women in Britain. *Social Science & Medicine* 2005; 61: 2460-2465. DOI: <https://doi.org/10.1016/j.socscimed.2005.07.017>.
8. Young B, Bedford L, Kendrick D, et al. Factors influencing the decision to attend screening for cancer in the UK: a meta-ethnography of qualitative research. *Journal of public health (Oxford, England)* 2018; 40: 315-339. 2017/05/10. DOI: 10.1093/pubmed/idx026.
9. Marlow LAV, Ferrer RA, Chorley AJ, et al. Variation in health beliefs across different types of cervical screening non-participants. *Preventive Medicine* 2018; 111: 204-209. DOI: <https://doi.org/10.1016/j.ypmed.2018.03.014>.
10. Waller J, Bartoszek M, Marlow L, et al. Barriers to cervical cancer screening attendance in England: a population-based survey. *Journal of medical screening* 2009; 16: 199-204. 2010/01/08. DOI: 10.1258/jms.2009.009073.
11. Marlow LAV, Chorley AJ, Haddrell J, et al. Understanding the heterogeneity of cervical cancer screening non-participants: Data from a national sample of British women. *European journal of cancer (Oxford, England : 1990)* 2017; 80: 30-38. 2017/05/24. DOI: 10.1016/j.ejca.2017.04.017.
12. Sheeran P and Conner M. Improving the translation of intentions into health actions: The role of motivational coherence. *Health psychology : official journal of the Division of Health Psychology, American Psychological Association* 2017; 36: 1065-1073. 2017/08/22. DOI: 10.1037/hea0000553.
13. Sheeran P. Intention—Behavior Relations: A Conceptual and Empirical Review. *European review of social psychology* 2002; 12: 1-36. DOI: 10.1080/14792772143000003.
14. Weinstein ND. The precaution adoption process. *Health psychology : official journal of the Division of Health Psychology, American Psychological Association* 1988; 7: 355-386. 1988/01/01.
15. Sheeran P and Webb T. The Intention—Behavior Gap. *Social and Personality Psychology Compass* 2016; 10: 503-518. DOI: doi:10.1111/spc3.12265.
16. Everett T, Bryant A, Griffin MF, et al. Interventions targeted at women to encourage the uptake of cervical screening. *The Cochrane database of systematic reviews* 2011: CD002834. 2011/05/13. DOI: 10.1002/14651858.CD002834.pub2.
17. McDowell I, Newell C and Rosser W. Computerized reminders to encourage cervical screening in family practice. *The Journal of family practice* 1989; 28: 420-424. 1989/04/01.
18. Binstock MA, Geiger AM, Hackett JR, et al. Pap smear outreach: a randomized controlled trial in an HMO. *American journal of preventive medicine* 1997; 13: 425-426. 1998/01/07.

19. Duffy SW, Myles JP, Maroni R, et al. Rapid review of evaluation of interventions to improve participation in cancer screening services. *Journal of medical screening* 2017; 24: 127-145. 2016/10/19. DOI: 10.1177/0969141316664757.
20. Kitchener HC, Gittins M, Rivero-Arias O, et al. A cluster randomised trial of strategies to increase cervical screening uptake at first invitation (STRATEGIC). *Health technology assessment (Winchester, England)* 2016; 20: 1-138. 2016/09/17. DOI: 10.3310/hta20680.
21. Ipsos. Social grade: a classification tool. 2009.
22. Sheeran P and Orbell S. Using implementation intentions to increase attendance for cervical cancer screening. *Health Psychology* 2000; 19: 283.
23. Kerrison RS, Shukla H, Cunningham D, et al. Text-message reminders increase uptake of routine breast screening appointments: a randomised controlled trial in a hard-to-reach population. *British journal of cancer* 2015; 112: 1005-1010. 2015/02/11. DOI: 10.1038/bjc.2015.36.
24. Chorley AJ, Marlow LA, Forster AS, et al. Experiences of cervical screening and barriers to participation in the context of an organised programme: a systematic review and thematic synthesis. *Psycho-oncology* 2017; 26: 161-172. 2016/04/14. DOI: 10.1002/pon.4126.
25. Quinn M, Babb P, Jones J, et al. Effect of screening on incidence of and mortality from cancer of cervix in England: evaluation based on routinely collected statistics. *BMJ (Clinical research ed)* 1999; 318: 904-908. 1999/04/02.
26. ONS. Labour Force Survey. Office for National Statistics, 2011.
27. GPPS. GP Patient Survey National results and trends. 2017.
28. MORI I. The GP Patient Survey 2018. Ipsos MORI, 2018.
29. Einstein GO, McDaniel MA, Williford CL, et al. Forgetting of intentions in demanding situations is rapid. *Journal of experimental psychology Applied* 2003; 9: 147-162. 2003/10/23. DOI: 10.1037/1076-898x.9.3.147.
30. ONS. Ethnicity and National Identity in England and Wales: 2011. In: Statistics OfN, (ed.). 2011.
31. Johnson HC, Lafferty EI, Eggo RM, et al. Effect of HPV vaccination and cervical cancer screening in England by ethnicity: a modelling study. *The Lancet Public health* 2018; 3: e44-e51. 2018/01/09. DOI: 10.1016/s2468-2667(17)30238-4.
32. Howard M, Agarwal G and Lytwyn A. Accuracy of self-reports of Pap and mammography screening compared to medical record: a meta-analysis. *Cancer Causes & Control* 2008; 20: 1. journal article. DOI: 10.1007/s10552-008-9228-4.
33. Rauscher GH, Johnson TP, Cho YI, et al. Accuracy of Self-Reported Cancer-Screening Histories: A Meta-analysis. *Cancer Epidemiology Biomarkers & Prevention* 2008; 17: 748-757. DOI: 10.1158/1055-9965.epi-07-2629.

**Online Supplement 1: Could changing invitation and booking processes help women translate their cervical screening intentions into action? A population-based survey of women's preferences in Great Britain.**

(Mairead Ryan, Jo Waller and Laura Marlow)

*Questionnaire*

Have you ever been diagnosed with cervical cancer?

- 1 Yes
- 2 No

The next few questions in this section are about cervical screening, also known as a smear or a Pap test. The NHS Cervical Screening Programme invites women in England for a cervical screening, smear or Pap test every 3 years from age 25 to age 49 and every 5 years from age 50 to age 64. Which of these statements describes whether you have had a cervical screening? If you have had a cervical screening and can't remember when, please give your best estimate.

- 1 I have had a test within the last 3 years > INCLUDE (1)
- 2 My last test was 3 to 5 years ago > INCLUDE (2)
- 3 My last test was more than 5 years ago > INCLUDE (3)
- 4 I have never been invited to have a test > EXCLUDE
- 5 I have been invited but have never had a test > INCLUDE (4)
- 6 I have had a hysterectomy so I don't need to have tests > EXCLUDE
- 7 I have never heard of cervical screening > EXCLUDE

Will you go for cervical screening when next invited?

- 1 Definitely not > EXCLUDE
- 2 Probably not > EXCLUDE
- 3 Yes, probably > INCLUDE (a)
- 4 Yes, definitely > INCLUDE (a)

NB: Participants were categorised as follows based on responses to the above questions:

If answered 1 and a = maintainer

If 25-49 years and answered 2 and a = intender

If 50-64 and answered 2 and a = maintainer

If answered 3 or 4 and a = intender

On the next screen will be an invitation letter that the NHS sends to women to invite them to book a cervical screening appointment. Most women book cervical screening appointments at their GP practice. I would like you to imagine you received this letter in the post. Please read the letter and afterwards you will be asked some questions about your response to the letter.

\* Picture of NHS screening letter shown to participant

1  
2  
3 I will now read a number of statements relating to the cervical screening letter you've just read.  
4 After each statement, please state the extent to which you agree, on a scale from 'strongly disagree  
5 'to 'strongly agree'.

6  
7 How much do you agree or disagree with this statement?

8 It is easy for me to find time to read a letter like this.

- 9  
10 1 Strongly disagree  
11 2 Disagree  
12 3 Neither disagree or agree  
13 4 Agree  
14 5 Strongly agree  
15

16 How much do you agree or disagree with this statement?

17 I might forget to book an appointment after reading this letter.

- 18  
19 1 Strongly disagree  
20 2 Disagree  
21 3 Neither disagree or agree  
22 4 Agree  
23 5 Strongly agree  
24

25 How much do you agree or disagree with this statement?

26 It is difficult for me to call my GP practice during their opening hours.

27 \*GP opening hours provided if necessary: "Opening hours are generally between 8.00am to 6.30pm  
28 Monday to Friday"

- 29  
30 1 Strongly disagree  
31 2 Disagree  
32 3 Neither disagree or agree  
33 4 Agree  
34 5 Strongly agree  
35

36 How much do you agree or disagree with this statement?

37 I have access to a telephone/mobile with phone credit/minutes to call my GP practice.

- 38  
39 1 Strongly disagree  
40 2 Disagree  
41 3 Neither disagree or agree  
42 4 Agree  
43 5 Strongly agree  
44

45  
46 How much do you agree or disagree with this statement?

47 It would be easy for me to find the phone number for my GP practice to contact them.

- 48  
49 1 Strongly disagree  
50 2 Disagree  
51 3 Neither disagree or agree  
52 4 Agree  
53 5 Strongly agree  
54  
55  
56  
57  
58  
59  
60



1  
2  
3 How much do you agree or disagree with this statement?

4 I find it takes too long to get through to a receptionist when I phone my GP practice.

- 5           1           Strongly disagree  
6           2           Disagree  
7           3           Neither disagree or agree  
8           4           Agree  
9           5           Strongly agree

10  
11  
12 We are interested in what is important to you in terms of booking a cervical screening appointment.  
13 For the following statements I read out, please state the extent to which you think each factor is  
14 important to you, on a scale from 'very unimportant' to 'very important' when booking an  
15 appointment at your GP practice.  
16

17 How important is this when booking a cervical screening appointment at your GP practice?

18 Ease of booking

- 19  
20           1           Very unimportant  
21           2           Quite unimportant  
22           3           Neither unimportant or important  
23           4           Quite important  
24           5           Very important

25  
26 How important is this when booking a cervical screening appointment at your GP practice?

27 Cost of making booking (i.e. phone credit)

- 28  
29           1           Very unimportant  
30           2           Quite unimportant  
31           3           Neither unimportant or important  
32           4           Quite important  
33           5           Very important

34  
35 How important is this when booking a cervical screening appointment at your GP practice?

36 Choice of appointment times

- 37  
38           1           Very unimportant  
39           2           Quite unimportant  
40           3           Neither unimportant or important  
41           4           Quite important  
42           5           Very important

43  
44 How important is this when booking a cervical screening appointment at your GP practice?

45 Being able to change an appointment time/day after booking it

- 46  
47           1           Very unimportant  
48           2           Quite unimportant  
49           3           Neither unimportant or important  
50           4           Quite important  
51           5           Very important

1  
2  
3 How important is this when booking a cervical screening appointment at your GP practice?

4 Privacy when booking an appointment

- 5 1 Very unimportant  
6 2 Quite unimportant  
7 3 Neither unimportant or important  
8 4 Quite important  
9 5 Very important  
10

11  
12 How important is this when booking a cervical screening appointment at your GP practice?

13 How long it takes to book an appointment

- 14 1 Very unimportant  
15 2 Quite unimportant  
16 3 Neither unimportant or important  
17 4 Quite important  
18 5 Very important  
19

20  
21 How important is this when booking a cervical screening appointment at your GP practice?

22 Being able to talk with a healthcare professional when booking (e.g. to ask questions about the  
23 screening before attending)

- 24 1 Very unimportant  
25 2 Quite unimportant  
26 3 Neither unimportant or important  
27 4 Quite important  
28 5 Very important  
29

30  
31 How important is this when booking a cervical screening appointment at your GP practice?

32 Time to the next available appointment (e.g. next available appointment isn't for two weeks)

- 33 1 Very unimportant  
34 2 Quite unimportant  
35 3 Neither unimportant or important  
36 4 Quite important  
37 5 Very important  
38

39  
40 How important is this when booking a cervical screening appointment at your GP practice?

41 Being able to book an appointment when the GP practice is shut (e.g. online booking)

42 \*GP opening hours provided if necessary: "Opening hours are generally between 8.00am to 6.30pm  
43 Monday to Friday"

- 44 1 Very unimportant  
45 2 Quite unimportant  
46 3 Neither unimportant or important  
47 4 Quite important  
48 5 Very important  
49

50  
51 Again thinking about the letter you read which is sent in the post to invite women to book a cervical  
52 screening appointment. We are interested in different forms of communication to invite women to  
53 book a cervical screening appointment.  
54

55  
56 Please state the extent to which you think the following forms of communication are acceptable, on  
57 a scale from 'very unacceptable' to 'very acceptable'.  
58  
59  
60

1  
2  
3 How acceptable is this form of communication when being invited to book a cervical screening  
4 appointment?

5 Posted letter

- 6 1 Very unacceptable  
7 2 Quite unacceptable  
8 3 Neither unacceptable or acceptable  
9 4 Quite acceptable  
10 5 Very acceptable  
11  
12

13 \* If participant responded 'Quite unacceptable' or 'Very unacceptable', participant subsequently  
14 asked: Please can you tell me why you would not find receiving an invitation for a cervical screening  
15 appointment by posted letter acceptable?

16 How acceptable is this form of communication when being invited to book a cervical screening  
17 appointment?

18 Text message

- 19 1 Very unacceptable  
20 2 Quite unacceptable  
21 3 Neither unacceptable or acceptable  
22 4 Quite acceptable  
23 5 Very acceptable  
24  
25

26 \* If participant responded 'Quite unacceptable' or 'Very unacceptable', participant subsequently  
27 asked: Please can you tell me why you would not find receiving an invitation for a cervical screening  
28 appointment by text message acceptable?  
29

30  
31 How acceptable is this form of communication when being invited to book a cervical screening  
32 appointment?

33 Email

- 34 1 Very unacceptable  
35 2 Quite unacceptable  
36 3 Neither unacceptable or acceptable  
37 4 Quite acceptable  
38 5 Very acceptable  
39  
40

41 \* If participant responded 'Quite unacceptable' or 'Very unacceptable', participant subsequently  
42 asked: Please can you tell me why you would not find receiving an invitation for a cervical screening  
43 appointment by email acceptable?  
44  
45  
46  
47  
48  
49  
50  
51  
52  
53  
54  
55  
56  
57  
58  
59  
60

1  
2  
3  
4 How acceptable is this form of communication when being invited to book a cervical screening  
5 appointment?  
6

7 Phone call to your mobile phone

- 8 1 Very unacceptable  
9 2 Quite unacceptable  
10 3 Neither unacceptable or acceptable  
11 4 Quite acceptable  
12 5 Very acceptable  
13

14 \* If participant responded 'Quite unacceptable' or 'Very unacceptable', participant subsequently  
15 asked: Please can you tell me why you would not find receiving an invitation for a cervical screening  
16 appointment by phone call to your mobile phone acceptable?  
17

18  
19 How acceptable is this form of communication when being invited to book a cervical screening  
20 appointment?  
21

22 Phone call to your house landline

- 23 1 Very unacceptable  
24 2 Quite unacceptable  
25 3 Neither unacceptable or acceptable  
26 4 Quite acceptable  
27 5 Very acceptable  
28

29 \* If participant responded 'Quite unacceptable' or 'Very unacceptable', participant subsequently  
30 asked: Please can you tell me why you would not find receiving an invitation for a cervical screening  
31 appointment by phone call to your house landline acceptable?  
32

33 Imagine now that different options were available to you to book a cervical screening appointment  
34 at your GP practice. Please state the extent to which you are likely to use each of the following  
35 methods to book an appointment.  
36

37 How likely are you to use this method to book a cervical screening appointment at your GP practice?

38 Calling your GP practice

- 39 1 Very unlikely  
40 2 Quite unlikely  
41 3 Neither likely or unlikely  
42 4 Quite likely  
43 5 Very likely  
44  
45

46 How likely are you to use this method to book a cervical screening appointment at your GP practice?

47 Calling a 24-hour automated telephone appointment-booking system

- 48 1 Very unlikely  
49 2 Quite unlikely  
50 3 Neither likely or unlikely  
51 4 Quite likely  
52 5 Very likely  
53  
54  
55  
56  
57  
58  
59  
60

1  
2  
3 How likely are you to use this method to book a cervical screening appointment at your GP practice?

4 Requesting a call-back from your GP practice

- 5 1 Very unlikely  
6 2 Quite unlikely  
7 3 Neither likely or unlikely  
8 4 Quite likely  
9 5 Very likely

10  
11  
12 How likely are you to use this method to book a cervical screening appointment at your GP practice?

13 Booking on a website using a desktop computer/laptop

- 14 1 Very unlikely  
15 2 Quite unlikely  
16 3 Neither likely or unlikely  
17 4 Quite likely  
18 5 Very likely

19  
20  
21 How likely are you to use this method to book a cervical screening appointment at your GP practice?

22 Booking on a website using a smartphone

- 23 1 Very unlikely  
24 2 Quite unlikely  
25 3 Neither likely or unlikely  
26 4 Quite likely  
27 5 Very likely

28  
29  
30 How likely are you to use this method to book a cervical screening appointment at your GP practice?

31 Downloading an app to a smartphone to book an appointment (you could then use the app to book  
32 other appointments at your surgery)

- 33 1 Very unlikely  
34 2 Quite unlikely  
35 3 Neither likely or unlikely  
36 4 Quite likely  
37 5 Very likely

38  
39  
40 Which of the following methods have you previously used to book an appointment at your GP  
41 practice? This could be an appointment for anything, with a GP or with a nurse.

42 Please select all that apply.

- 43 1 Booked in person (i.e. at the reception desk)  
44 2 Booked by phoning the GP practice  
45 3 Booked using a 24-hour automated telephone appointment-booking system  
46 4 Booked online on a website  
47 5 Booked by text-message  
48 6 Booked using a smartphone app  
49 7 Other  
50 8 Don't know - someone else has always booked my appointments  
51 9 I have never booked an appointment at my GP practice  
52  
53  
54  
55  
56  
57  
58  
59  
60

1  
2  
3 Do you have a mobile phone?

4 \*Description of smartphone provided if necessary; "A 'smart phone' is a mobile phone that performs  
5 many of the functions of a computer, typically having a touchscreen and Internet access"

- 6  
7 1 Yes, a smart phone  
8 2 Yes, but it is not a smart phone  
9 3 No, I do not have a mobile phone  
10  
11  
12  
13  
14  
15  
16  
17  
18  
19  
20  
21  
22  
23  
24  
25  
26  
27  
28  
29  
30  
31  
32  
33  
34  
35  
36  
37  
38  
39  
40  
41  
42  
43  
44  
45  
46  
47  
48  
49  
50  
51  
52  
53  
54  
55  
56  
57  
58  
59  
60

For peer review only

**Online Supplement 2: Could changing invitation and booking processes help women translate their cervical screening intentions into action? A population-based survey of women’s preferences in Great Britain.**

(Mairead Ryan, Jo Waller and Laura Marlow)

*Survey inclusion flow diagram*

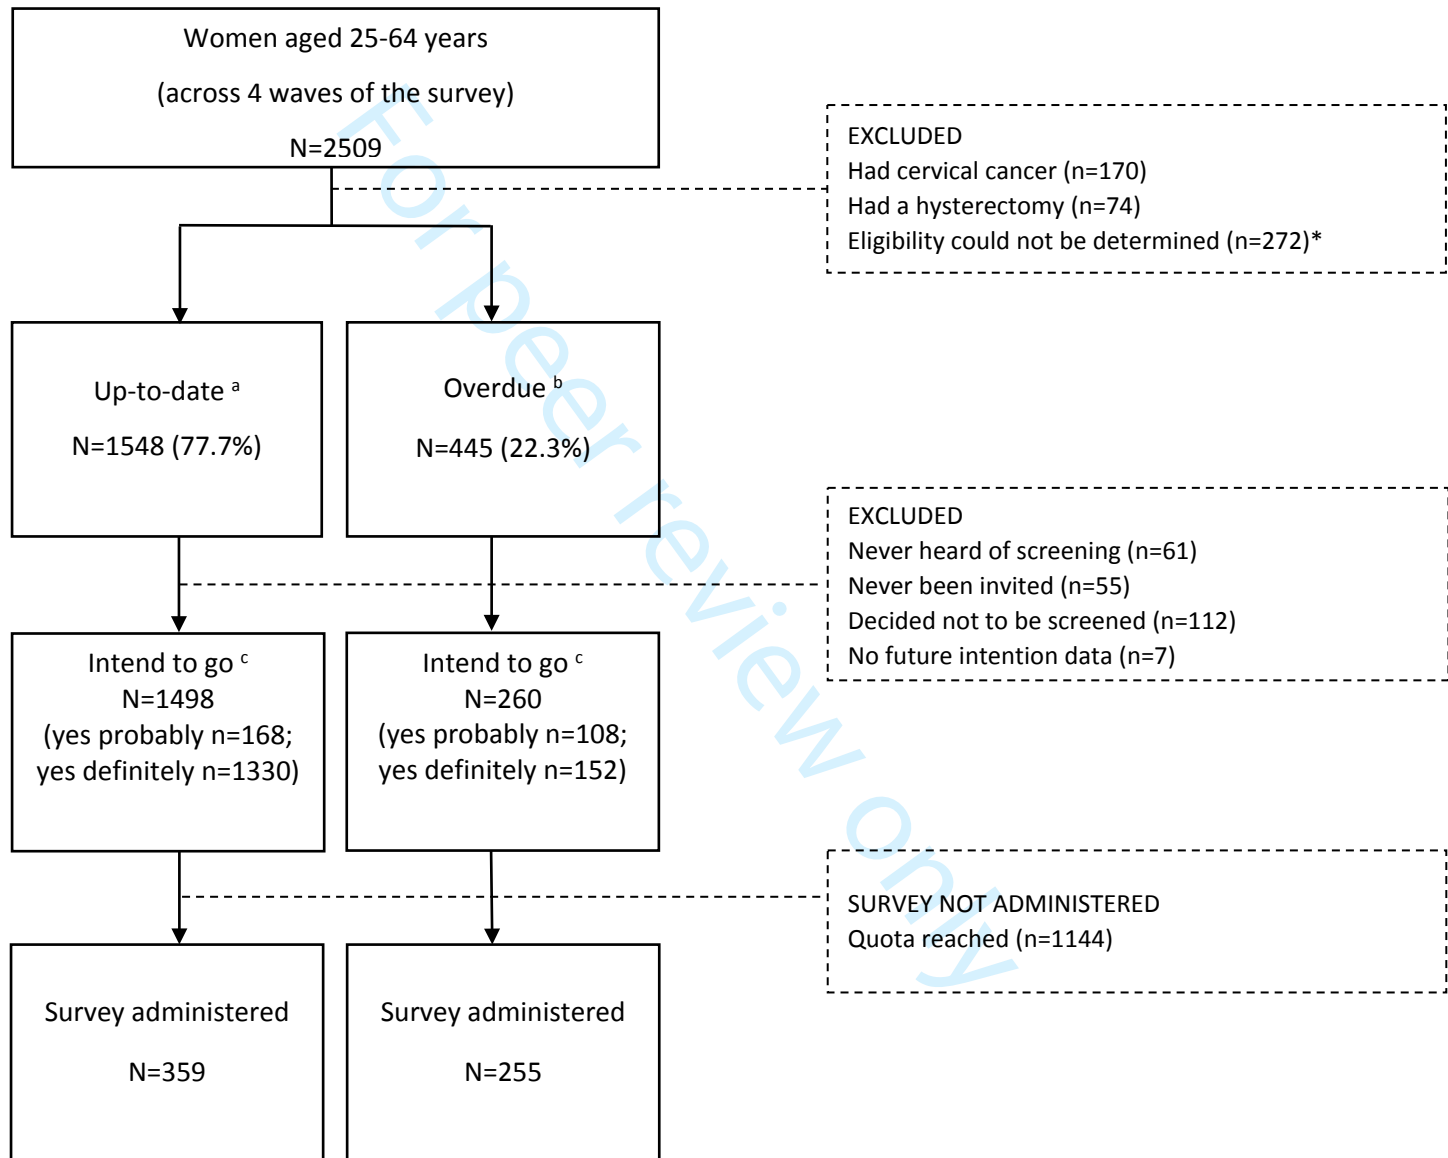

\*Women who refused to answer the hysterectomy question (n=177) or screening uptake question (n=95)

<sup>a</sup> Up-to-date: been screened within the last 3 years if 25-64 years or the last 5 years if 50-64 years

<sup>b</sup> Overdue: not been screened within the last 3 years if 25-64 years or the last 5 years if 50-64 years

<sup>c</sup> Responded that they would ‘probably’ or ‘definitely’ attend screening when next invited

**Online Supplement 3: Could changing invitation and booking processes help women translate their cervical screening intentions into action? A population-based survey of women’s preferences in Great Britain.**  
 (Mairead Ryan, Jo Waller and Laura Marlow)

Table 1:

Multivariable logistic regression models of predictors of the acceptability of cervical screening invitation modalities (n=614)

|                                | Posted letter      | Text-message        | Email               | Mobile phone call  | Landline phone call |
|--------------------------------|--------------------|---------------------|---------------------|--------------------|---------------------|
|                                | OR (95% CI)        | OR (95% CI)         | OR (95% CI)         | OR (95% CI)        | OR (95% CI)         |
| <b>Age group</b>               |                    |                     |                     |                    |                     |
| 25-34                          | 1.00               | 1.00                | 1.00                | 1.00               | 1.00                |
| 35-44                          | 0.63 (0.30-1.34)   | 0.71 (0.40-1.25)    | 0.64 (0.38-1.05)    | 0.78 (0.46-1.32)   | 1.06 (0.68-1.63)    |
| 45-54                          | 0.49 (0.22-1.06)   | 0.63 (0.35-1.12)    | 0.71 (0.42-1.20)    | 0.50 (0.30-0.85)*  | 0.70 (0.44-1.10)    |
| 55-64                          | 1.03 (0.36-2.94)   | 0.29 (0.15-0.53)*** | 0.35 (0.19-0.63)*** | 0.47 (0.26-0.86)*  | 0.99 (0.58-1.70)    |
| <b>Social grade</b>            |                    |                     |                     |                    |                     |
| AB                             | 1.00               | 1.00                | 1.00                | 1.00               | 1.00                |
| C1                             | 0.78 (0.36-1.66)   | 1.03 (0.58-1.82)    | 0.75 (0.43-1.32)    | 1.17 (0.71-1.94)   | 1.04 (0.65-1.67)    |
| C2                             | 3.47 (1.18-10.27)* | 1.04 (0.58-1.87)    | 0.68 (0.39-1.21)    | 2.58 (1.45-4.58)** | 1.82 (1.11-2.99)    |
| D                              | 1.75 (0.63-4.92)   | 1.60 (0.78-3.28)    | 0.90 (0.47-1.73)    | 1.82 (0.98-3.39)   | 1.67 (0.96-2.90)    |
| E                              | 0.88 (0.31-2.52)   | 0.92 (0.42-2.01)    | 0.38 (0.19-0.78)**  | 2.98 (1.35-6.58)** | 1.76 (0.90-3.43)    |
| <b>Employment</b>              |                    |                     |                     |                    |                     |
| Employed                       | 1.00               | 1.00                | 1.00                | 1.00               | 1.00                |
| Unemployed                     | 0.63 (0.30-1.33)   | 1.12 (0.65-1.94)    | 0.89 (0.54-1.47)    | 1.06 (0.63-1.79)   | 1.31 (0.83-2.06)    |
| Other (studying/retired)†      | -                  | -                   | -                   | -                  | -                   |
| <b>Ethnicity</b>               |                    |                     |                     |                    |                     |
| White                          | 1.00               | 1.00                | 1.00                | 1.00               | 1.00                |
| All other groups               | 0.45 (0.21-0.97)*  | 1.60 (0.75-3.39)    | 2.22 (1.08-4.57)*   | 1.26 (0.65-2.45)   | 1.38 (0.79-2.42)    |
| <b>Caring responsibilities</b> |                    |                     |                     |                    |                     |
| No                             | 1.00               | 1.00                | 1.00                | 1.00               | 1.00                |
| Yes                            | 1.79 (0.96-3.23)   | 1.09 (0.70-1.69)    | 1.19 (0.79-1.80)    | 1.60 (1.06-2.41)*  | 1.20 (0.83-1.73)    |

Note. OR= adjusted odds ratio; CI= confidence interval; \*p<0.05, \*\*p<0.01, \*\*\*p<0.001; ‘screening status’ and ‘practical barriers’ variables not included because not significant in univariable analyses; †category not included due to insufficient cases



Table 2

Multivariable logistic regression models of predictors of phone-based booking preferences (n=614)

|                                | Calling the GP   | Calling a 24-hour automated service | Requesting a call-back |
|--------------------------------|------------------|-------------------------------------|------------------------|
|                                | OR (95% CI)      | OR (95% CI)                         | OR (95% CI)            |
| <b>Age group</b>               |                  |                                     |                        |
| 25-34                          | 1.00             | 1.00                                | 1.00                   |
| 35-44                          | 0.78 (0.38-1.60) | 0.68 (0.45-1.04)                    | 0.96 (0.62-1.47)       |
| 45-54                          | 0.70 (0.32-1.50) | 0.50 (0.32-0.79)*                   | 0.65 (0.41-1.03)       |
| 55-64                          | 0.76 (0.31-1.83) | 0.45 (0.27-0.76)**                  | 1.19 (0.70-2.01)       |
| <b>Caring responsibilities</b> |                  |                                     |                        |
| No                             | 1.00             | 1.00                                | 1.00                   |
| Yes                            | 1.11 (0.61-2.01) | 0.95 (0.67-1.37)                    | 1.82 (1.26-2.62)**     |
| <b>Screening status</b>        |                  |                                     |                        |
| Intender                       | 1.00             | 1.00                                | 1.00                   |
| Maintainer                     | 1.55 (0.89-2.68) | 0.97 (0.70-1.36)                    | 0.68 (0.48-0.95)*      |
| <b>Practical barriers</b>      |                  |                                     |                        |
| 0 barriers                     | 1.00             | 1.00                                | 1.00                   |
| 1 barrier                      | 1.48 (0.71-3.06) | 0.90 (0.59-1.36)                    | 0.81 (0.53-1.23)       |
| 2 barriers                     | 1.39 (0.65-2.97) | 1.26 (0.81-1.96)                    | 1.26 (0.80-1.97)       |
| 3 or more barriers cited       | 0.63 (0.29-1.37) | 1.63 (0.94-2.82)                    | 1.35 (0.77-2.36)       |

Note. OR= adjusted odds ratio; CI= confidence interval; \*p<0.05, \*\*p<0.01, \*\*\*p<0.001; 'social grade', 'employment' and 'ethnicity' not included because not significant in univariable analyses

Table 3

Multivariable logistic regression models of predictors of online booking preferences (n=614)

|                           | Booking on a website<br>using a desktop/laptop | Booking on a website<br>using a smartphone <sup>a</sup> | Downloading an app to<br>your smartphone <sup>a</sup> |
|---------------------------|------------------------------------------------|---------------------------------------------------------|-------------------------------------------------------|
|                           | OR (95% CI)                                    | OR (95% CI)                                             | OR (95% CI)                                           |
| <b>Age group</b>          |                                                |                                                         |                                                       |
| 25-34                     | 1.00                                           | 1.00                                                    | 1.00                                                  |
| 35-44                     | 0.64 (0.42-1.00)*                              | 0.63 (0.39-1.01)                                        | 0.56 (0.36-0.88)*                                     |
| 45-54                     | 0.58 (0.36-0.93)*                              | 0.42 (0.25-0.71)**                                      | 0.39 (0.24-0.65)***                                   |
| 55-64                     | 0.34 (0.20-0.58)***                            | 0.28 (0.15-0.52)***                                     | 0.25 (0.13-0.47)***                                   |
| <b>Social grade</b>       |                                                |                                                         |                                                       |
| AB                        | 1.00                                           | 1.00                                                    | 1.00                                                  |
| C1                        | 0.52 (0.31-0.86)*                              | 0.57 (0.33-0.98)*                                       | 0.81 (0.48-1.35)                                      |
| C2                        | 0.55 (0.33-0.93)*                              | 0.49 (0.28-0.86)*                                       | 0.87 (0.51-1.49)                                      |
| D                         | 0.50 (0.78-0.89)*                              | 0.42 (0.23-0.79)**                                      | 0.65 (0.36-1.18)                                      |
| E                         | 0.35 (0.18-0.69)**                             | 0.47 (0.21-1.03)                                        | 0.78 (0.36-1.69)                                      |
| <b>Employment</b>         |                                                |                                                         |                                                       |
| Employed                  | 1.00                                           | 1.00                                                    | 1.00                                                  |
| Unemployed                | 0.80 (0.51-1.24)                               | 0.75 (0.46-1.24)                                        | 0.73 (0.44-1.18)                                      |
| Other (studying/retired)  | 0.82 (0.39-1.73)                               | 0.50 (0.21-1.16)                                        | 0.34 (0.13-0.87)*                                     |
| <b>Practical barriers</b> |                                                |                                                         |                                                       |
| 0 barriers                | 1.00                                           | 1.00                                                    | 1.00                                                  |
| 1 barrier                 | 1.46 (0.96-2.23)                               | 1.33 (0.84-2.12)                                        | 1.33 (0.84-2.12)                                      |
| 2 barriers                | 1.73 (1.10-2.73)*                              | 1.76 (1.07-2.91)*                                       | 1.78 (1.09-2.90)*                                     |
| 3 or more barriers        | 2.16 (1.22-3.82)**                             | 2.63 (0.40-4.92)**                                      | 2.45 (1.35-4.44)**                                    |

Note. OR= adjusted odds ratio; CI= confidence interval; \*p<0.05, \*\*p<0.01, \*\*\*p<0.001; <sup>a</sup> participants with no smartphone removed from analyses (n = 81); 'ethnicity', 'caring responsibilities' and 'screening status' not included because not significant in univariable analyses

**Online Supplement 4: Could changing invitation and booking processes help women translate their cervical screening intentions into action? A population-based survey of women's preferences in Great Britain.**

(Mairead Ryan, Jo Waller and Laura Marlow)

*Open responses provided for citing invitation method as unacceptable*

| Invitation mode | Unacceptable (n) | Reasons for being unacceptable                                                                                                                                                                                                                                                                                                                                                                                                                                                                                                                                                                                        |
|-----------------|------------------|-----------------------------------------------------------------------------------------------------------------------------------------------------------------------------------------------------------------------------------------------------------------------------------------------------------------------------------------------------------------------------------------------------------------------------------------------------------------------------------------------------------------------------------------------------------------------------------------------------------------------|
| Posted letter   | 12               | <p>Don't open post/might miss the letter/no time to read letter (n=4)<br/>           Receive letter too late (n=2)<br/>           Letter could be lost in the post (n=2)<br/>           Other (n=4)</p> <ul style="list-style-type: none"> <li>• Would forget (n=1)</li> <li>• Environmental concerns (n=1)</li> <li>• Waste of time (n=1)</li> <li>• No reason provided (n=1)</li> </ul>                                                                                                                                                                                                                             |
| Text-message    | 67               | <p>Privacy concerns (n=21)<br/>           Easy to miss it/may not read message (n=9)<br/>           Reason not provided (i.e. N/A) (n=9)<br/>           Doesn't have or use mobile (n=7)<br/>           Impersonal (n=6)<br/>           Could change number (n=4)<br/>           Prefer a letter/phone call (n=4)<br/>           Not reliable source/unprofessional (n=3)<br/>           Would forget/not act on it (n=2)<br/>           Other (n=2)</p> <ul style="list-style-type: none"> <li>• Don't know (n=1)</li> <li>• They can text me but I don't want to text them (n=1)</li> </ul>                         |
| Email           | 94               | <p>Would be lost in other emails/would not be seen (n=38)<br/>           No email/doesn't use email/no internet/no computer (n=17)<br/>           Privacy concerns (n=12)<br/>           Reason not provided (i.e. N/A) (n=12)<br/>           Prefer phone or letter (n=5)<br/>           Would forget/not act on it (n=2)<br/>           Impersonal/rude (n=2)<br/>           Other (n=6)</p> <ul style="list-style-type: none"> <li>• Not timely (n=1)</li> <li>• Intrusive (n=1)</li> <li>• Not normal (n=1)</li> <li>• No reason (n=1)</li> <li>• Not keen (n=1)</li> <li>• Doesn't trust source (n=1)</li> </ul> |
| Mobile          | 90               | <p>Would not be able to pick up/would miss call (n=33)</p>                                                                                                                                                                                                                                                                                                                                                                                                                                                                                                                                                            |

|                     |     |                                                                                                                                                                                                                                                                                                                                                                                                                                                                                                                                                                                                                                      |
|---------------------|-----|--------------------------------------------------------------------------------------------------------------------------------------------------------------------------------------------------------------------------------------------------------------------------------------------------------------------------------------------------------------------------------------------------------------------------------------------------------------------------------------------------------------------------------------------------------------------------------------------------------------------------------------|
| phone call          |     | <p>Privacy concerns (n=22)<br/>         Would prefer in writing/a letter (n=10)<br/>         Reason not provided (i.e. N/A) (n=8)<br/>         Would not know number – so would not answer call (n=5)<br/>         No mobile (n=2)<br/>         Would forget (n=2)<br/>         Too many phone calls (n=2)<br/>         Other (n=6)</p> <ul style="list-style-type: none"> <li>• Don't like idea (n=1)</li> <li>• Talking takes too much time (n=1)</li> <li>• Need time to think (n=1)</li> <li>• Impersonal (n=1)</li> <li>• People change phone number (n=1)</li> <li>• Don't like calls (n=1)</li> </ul>                         |
| Landline phone call | 129 | <p>No landline (n=39)<br/>         Would miss call/out of the house during the day (n=31)<br/>         Privacy concerns (n=24)<br/>         No reason provided (i.e. N/A) (n=12)<br/>         Feels intrusive (n=5)<br/>         Prefer in writing/letter (n=5)<br/>         Don't want phone call (n=4)<br/>         Not reliable source (n=3)<br/>         Other (n=6)</p> <ul style="list-style-type: none"> <li>• Impersonal (n=1)</li> <li>• "Better with working" (n=1)</li> <li>• Unnecessary (n=1)</li> <li>• Unknown number (n=1)</li> <li>• Want time to think (n=1)</li> <li>• Doesn't matter either way (n=1)</li> </ul> |

**STROBE 2007 (v4) Statement—Checklist of items that should be included in reports of *cross-sectional studies***

| Section/Topic                | Item # | Recommendation                                                                                                                                                                       | Reported on page # |
|------------------------------|--------|--------------------------------------------------------------------------------------------------------------------------------------------------------------------------------------|--------------------|
| <b>Title and abstract</b>    | 1      | (a) Indicate the study's design with a commonly used term in the title or the abstract                                                                                               | 2                  |
|                              |        | (b) Provide in the abstract an informative and balanced summary of what was done and what was found                                                                                  | 2                  |
| <b>Introduction</b>          |        |                                                                                                                                                                                      |                    |
| Background/rationale         | 2      | Explain the scientific background and rationale for the investigation being reported                                                                                                 | 3-4                |
| Objectives                   | 3      | State specific objectives, including any prespecified hypotheses                                                                                                                     | 4                  |
| <b>Methods</b>               |        |                                                                                                                                                                                      |                    |
| Study design                 | 4      | Present key elements of study design early in the paper                                                                                                                              | 4                  |
| Setting                      | 5      | Describe the setting, locations, and relevant dates, including periods of recruitment, exposure, follow-up, and data collection                                                      | 4                  |
| Participants                 | 6      | (a) Give the eligibility criteria, and the sources and methods of selection of participants                                                                                          | 4-5                |
| Variables                    | 7      | Clearly define all outcomes, exposures, predictors, potential confounders, and effect modifiers. Give diagnostic criteria, if applicable                                             | 5-6                |
| Data sources/<br>measurement | 8*     | For each variable of interest, give sources of data and details of methods of assessment (measurement). Describe comparability of assessment methods if there is more than one group | 5-6                |
| Bias                         | 9      | Describe any efforts to address potential sources of bias                                                                                                                            | 4                  |
| Study size                   | 10     | Explain how the study size was arrived at                                                                                                                                            | 5                  |
| Quantitative variables       | 11     | Explain how quantitative variables were handled in the analyses. If applicable, describe which groupings were chosen and why                                                         | 6                  |
| Statistical methods          | 12     | (a) Describe all statistical methods, including those used to control for confounding                                                                                                | 6                  |
|                              |        | (b) Describe any methods used to examine subgroups and interactions                                                                                                                  | 6                  |
|                              |        | (c) Explain how missing data were addressed                                                                                                                                          |                    |
|                              |        | (d) If applicable, describe analytical methods taking account of sampling strategy                                                                                                   |                    |
|                              |        | (e) Describe any sensitivity analyses                                                                                                                                                |                    |
| <b>Results</b>               |        |                                                                                                                                                                                      |                    |

|                          |     |                                                                                                                                                                                                              |            |
|--------------------------|-----|--------------------------------------------------------------------------------------------------------------------------------------------------------------------------------------------------------------|------------|
| Participants             | 13* | (a) Report numbers of individuals at each stage of study—eg numbers potentially eligible, examined for eligibility, confirmed eligible, included in the study, completing follow-up, and analysed            | 6          |
|                          |     | (b) Give reasons for non-participation at each stage                                                                                                                                                         | n/a        |
|                          |     | (c) Consider use of a flow diagram                                                                                                                                                                           |            |
| Descriptive data         | 14* | (a) Give characteristics of study participants (eg demographic, clinical, social) and information on exposures and potential confounders                                                                     | 6-7        |
|                          |     | (b) Indicate number of participants with missing data for each variable of interest                                                                                                                          |            |
| Outcome data             | 15* | Report numbers of outcome events or summary measures                                                                                                                                                         |            |
| Main results             | 16  | (a) Give unadjusted estimates and, if applicable, confounder-adjusted estimates and their precision (eg, 95% confidence interval). Make clear which confounders were adjusted for and why they were included | 7-8, 12-15 |
|                          |     | (b) Report category boundaries when continuous variables were categorized                                                                                                                                    | 5-6        |
|                          |     | (c) If relevant, consider translating estimates of relative risk into absolute risk for a meaningful time period                                                                                             | n/a        |
| Other analyses           | 17  | Report other analyses done—eg analyses of subgroups and interactions, and sensitivity analyses                                                                                                               |            |
| <b>Discussion</b>        |     |                                                                                                                                                                                                              |            |
| Key results              | 18  | Summarise key results with reference to study objectives                                                                                                                                                     | 8-10       |
| Limitations              | 19  | Discuss limitations of the study, taking into account sources of potential bias or imprecision. Discuss both direction and magnitude of any potential bias                                                   | 9-10       |
| Interpretation           | 20  | Give a cautious overall interpretation of results considering objectives, limitations, multiplicity of analyses, results from similar studies, and other relevant evidence                                   | 10         |
| Generalisability         | 21  | Discuss the generalisability (external validity) of the study results                                                                                                                                        | 9-10       |
| <b>Other information</b> |     |                                                                                                                                                                                                              |            |
| Funding                  | 22  | Give the source of funding and the role of the funders for the present study and, if applicable, for the original study on which the present article is based                                                | 1          |

\*Give information separately for cases and controls in case-control studies and, if applicable, for exposed and unexposed groups in cohort and cross-sectional studies.

**Note:** An Explanation and Elaboration article discusses each checklist item and gives methodological background and published examples of transparent reporting. The STROBE checklist is best used in conjunction with this article (freely available on the Web sites of PLoS Medicine at <http://www.plosmedicine.org/>, Annals of Internal Medicine at <http://www.annals.org/>, and Epidemiology at <http://www.epidem.com/>). Information on the STROBE Initiative is available at [www.strobe-statement.org](http://www.strobe-statement.org).

# BMJ Open

**Could changing invitation and booking processes help women translate their cervical screening intentions into action? A population-based survey of women's preferences in Great Britain.**

|                                 |                                                                                                                                                                                                                               |
|---------------------------------|-------------------------------------------------------------------------------------------------------------------------------------------------------------------------------------------------------------------------------|
| Journal:                        | <i>BMJ Open</i>                                                                                                                                                                                                               |
| Manuscript ID                   | bmjopen-2018-028134.R2                                                                                                                                                                                                        |
| Article Type:                   | Research                                                                                                                                                                                                                      |
| Date Submitted by the Author:   | 28-May-2019                                                                                                                                                                                                                   |
| Complete List of Authors:       | Ryan, Mairead; University College London Institute of Epidemiology and Health Care, Department of Behavioural Science and Health; Waller, Jo; UCL, Epidemiology and Public Health<br>Marlow, Laura; University College London |
| <b>Primary Subject Heading</b>: | Epidemiology                                                                                                                                                                                                                  |
| Secondary Subject Heading:      | Epidemiology, Communication                                                                                                                                                                                                   |
| Keywords:                       | cervical cancer screening, non-participants, interventions, age, screening status, uptake                                                                                                                                     |
|                                 |                                                                                                                                                                                                                               |

SCHOLARONE™  
Manuscripts

1  
2  
3 Could changing invitation and booking processes help women translate their cervical screening  
4 intentions into action? A population-based survey of women's preferences in Great Britain.  
5  
6  
7

8 Mairead Ryan, MSc

9 Jo Waller, PhD

10 Laura A.V Marlow, PhD  
11  
12  
13  
14  
15

16 Cancer Communication and Screening Group, Research Department of Behavioural Science and  
17 Health, University College London, Gower Street, London, UK  
18  
19

20 Corresponding author contact details: Laura Marlow, l.marlow@ucl.ac.uk, 020 7679 1798.  
21  
22  
23  
24

25 MR, JW and LM are supported by a Cancer Research UK Career Development Fellowship awarded to  
26 JW (C7492/A17219).  
27  
28  
29  
30  
31  
32  
33  
34  
35  
36  
37  
38  
39  
40  
41  
42  
43  
44  
45  
46  
47  
48  
49  
50  
51  
52  
53  
54  
55  
56  
57  
58  
59  
60



## Abstract

**Objectives:** Many women who do not attend screening intend to go, but do not get around to booking an appointment. Qualitative work suggests these 'intenders' face more practical barriers to screening than women who are up-to-date ('maintainers'). This study explored practical barriers to booking a screening appointment and preferences for alternative invitation and booking methods that might overcome these barriers.

**Design:** A cross-sectional survey was employed.

**Setting:** Great Britain

**Participants:** Women aged 25 to 64, living in Great Britain who intended to be screened but were overdue ('intenders', n=255) and women who were up-to-date with screening ('maintainers', n=359)

**Results:** 'Intenders' reported slightly more barriers than 'maintainers' overall (mean = 1.36 vs 1.06,  $t=3.03$ ,  $p<0.01$ ) and were more likely to think they might forget to book an appointment (Odds ratio=2.87, 95% confidence interval: 2.01-4.09). Over half of women said they would book on a website using a smartphone (62%), a computer (58%) or via an app (52%). Older women and women from lower social grades were less likely to say they would use online booking methods (all  $ps<.05$ ). Women who reported two or more barriers were more likely to say they would use online booking than women who reported none ( $ps<.01$ ).

**Conclusions:** Women who are overdue for screening face practical barriers to booking appointments. Future interventions may assess the efficacy of changing the architecture of the invitation and booking system. This may help women overcome logistical barriers to participation and increase coverage for cervical screening.

### Strengths and limitations of this study

- This was the first study to break down the invitation and booking process into its component parts, identifying barriers at each stage of the process and alternative booking options which may help women to overcome these barriers

- Women were purposely recruited to be up-to-date and overdue, however response rate was not recorded.
- The practical barriers cited in this study relate to the booking process and are not exhaustive of all practical barriers to cervical screening. They may not reflect booking processes in other countries.

## Introduction

Cervical screening programmes are designed to reduce the incidence and mortality rate of cervical cancer.<sup>1</sup> In Great Britain all eligible women aged 25 to 64 registered with a GP are invited to be screened for the presence of abnormal cell changes in the cervix, which could, if undetected and untreated, develop into cervical cancer. The efficacy of the programme has been widely acknowledged,<sup>2</sup> however the success of any screening programme is dependent on good coverage. In 2017, coverage (i.e. the percentage of eligible women recorded as adequately screened) was 72%, well below the national target of 80% and in keeping with a trend of decreasing screening coverage.

Reasons for screening non-attendance are complex and differ depending on socio-demographic factors such as age, socio-economic status and marital status.<sup>3-6</sup> Emotional barriers including embarrassment, fear of pain and negative experiences are often reported, particularly in qualitative studies.<sup>7-9</sup> While these barriers undoubtedly need to be addressed, practical barriers have been found to be more predictive of screening status than emotional barriers.<sup>10</sup> Recent research showed that over half of women overdue for cervical screening have positive intentions to attend.<sup>11</sup> While this is encouraging, intentions are frequently not translated into action.<sup>12, 13</sup>

Weinstein used a 'messy desk' analogy to help explain the problem of translating intentions into action.<sup>14</sup> He proposed that we do not carry out errands in a logical sequence, but rather in a haphazard manner, acting on 'to-do' list items when we feel pressure, when items need to be actioned quickly, when prompted or because of personal preference. More recently, Sheeran and Webb identified three key problems (or 'TRIALS') people might encounter when trying to realise their intentions; i) they fail to get started (e.g. forget to act or miss an opportunity to act), ii) they fail to keep the goal on track (fail to monitor the goal, face competing thoughts or distractions) and iii) they fail to close (don't quite meet the goal).<sup>15</sup>

Women receive a posted letter inviting them to book a screening appointment. The letter states the recipient "can make an appointment for cervical screening by phoning (*their*) GP surgery". GP surgery hours generally coincide with 'normal' working hours, presenting several practical barriers for women who are in full-time employment or who have caring responsibilities, both in terms of

1  
2  
3 phoning and attending a GP surgery. Previous research has identified that many women find the  
4 booking process arduous and inflexible.<sup>3</sup>  
5

6  
7 Few studies have assessed alternative methods of inviting women for cervical screening.<sup>16</sup> The most  
8 recent Cochrane review of interventions to improve uptake<sup>16</sup> reported two studies from the 1980s  
9 and 90s, which found that participants who received a telephone invitation were significantly more  
10 likely to attend than those who received a letter.<sup>17, 18</sup> Studies which have examined the utility of  
11 more recent technological developments to invite women are lacking.<sup>19</sup> There is also a paucity of  
12 literature concerning alternative booking methods for cervical screening, most likely due to limited  
13 booking options being available until recently. One trial investigated the efficacy of online booking  
14 among first time invitees.<sup>20</sup> The intervention group booked slightly more appointments within three  
15 months (2.18% higher than the control group) however, this was not statistically significant.<sup>20</sup> The  
16 authors noted that the way the online booking system was offered could account for the lack of  
17 support (in a letter participants were asked to visit a website to book at one of three sexual health  
18 clinics). Hence, other forms of online booking may be desirable to women.  
19

20  
21 New technologies offer opportunities for editing the architecture of the invitation and booking  
22 system in ways that may help to overcome some of the challenges women face between forming a  
23 positive intention and translating this into behaviour, as highlighted in the TRIALS model. For  
24 example, online booking methods may reduce the likelihood that women would fail to get started,  
25 given that opportunities to act (i.e. book an appointment) are not limited to GP practice opening  
26 hours. The present study explored practical barriers to booking an appointment among two groups:  
27 women who are up-to-date with screening ('maintainers') and women who intend to be screened  
28 but are currently overdue ('intenders'). Our aim was to examine between-group differences which  
29 may account for this intention-behaviour gap among 'intenders'. We also assessed invitation and  
30 booking preferences and explored whether these might help to overcome practical barriers.  
31  
32

## 33 **Methods**

### 34 *Participants*

35  
36 Participants were recruited by Kantar TNS UK as part of their omnibus survey. The TNS omnibus  
37 survey recruits a new sample of 2000-4000 men and women living in Great Britain on a weekly basis  
38 and asks questions on a range of topics commissioned by external companies. Recruitment uses  
39 random location sampling to identify areas for sampling participants using the 2011 Census and the  
40 Postcode Address File. Recruiters visit homes in the identified areas and knock on doors asking those  
41 who answer to participate. All interviews are conducted in English. Quotas are set at each location  
42 for age, gender, working status, and presence of children in the household.  
43  
44

1  
2  
3 Women who were eligible for cervical screening and had not previously been diagnosed with  
4 cervical cancer, were asked to report their past attendance at cervical screening and future intention  
5 to attend (see Online Supplement 1). Responses to these questions were used to classify women as  
6  
7  
8 'intenders' (intended to be screened but were currently overdue), 'maintainers' (up-to-date with  
9 screening and intending to go in the future) or 'other' (never heard of screening, never been invited,  
10 decided not to be screened). A sample of 600 women was expected to allow us to establish a  
11 significant difference of 5% between preferred booking options in the two groups of attenders  
12 within +/- 8% with 95% confidence.  
13  
14  
15

### 16 17 *Procedure*

18  
19 Ethical approval was granted by University College London Research Ethics Committee (reference:  
20 10353/003). Data were collected between April and May 2018. Face-to-face computer-assisted  
21 personal interviews were used to collect data. Kantar TNS provided anonymised data to UCL for  
22 analysis.  
23  
24  
25

### 26 27 *Measures*

28  
29 *Invitation preferences:* Participants were asked whether several different modes of communication  
30 were acceptable to them as a means of being invited to book a cervical screening appointment (see  
31 Online Supplement 1). Participants' responses were recoded as 'acceptable' (if they responded quite  
32 acceptable/very acceptable) or 'unacceptable/ambivalent' (if they responded quite  
33 unacceptable/very unacceptable/neither unacceptable nor acceptable). Participants who responded  
34 quite/very unacceptable were asked to explain why (open response).  
35  
36  
37  
38

39  
40 *Practical barriers to booking an appointment:* Participants were asked to respond to a list of barriers,  
41 which were based on the key problems outlined in the TRIALS model.<sup>15</sup> Statements addressing the  
42 key problem of 'failing to get started' included 'It is easy for me to find time to read a letter like this'  
43 and 'I might forget to book an appointment after reading this letter'. Statements addressing 'failing  
44 to keep the goal on track' included 'It is difficult for me to call my GP practice during their opening  
45 hours' and 'I find it difficult to get through to a receptionist when I phone my GP practice'. Women  
46 were then asked to state which booking attributes were important to them, the aim of which was to  
47 address factors that might influence 'failure to close' (i.e. being able to book the appointment).  
48  
49  
50  
51  
52

53  
54 *Booking preferences:* Participants were asked to indicate how likely they would be to use different  
55 booking methods. The feasibility of these methods were informally discussed with stakeholders from  
56 the NHS national screening programme and with representatives from a technology company, who  
57 develop methods of improving access to healthcare. Participants' responses were recoded as 'likely  
58 to use' a method (if they responded quite likely/very likely) or 'not likely to use/ambivalent' (if they  
59  
60

1  
2  
3 responded quite unlikely/very unlikely/neither unlikely nor likely). Participants were also asked to  
4 indicate which booking methods they had used in the past for any GP appointment.  
5

6  
7 *Socio-demographic and background factors:* Data regarding age, ethnicity, education level,  
8 employment status, marital status, social grade, child/carer responsibilities and smartphone  
9 ownership were also collected. Social grade is determined by the occupation of the Chief Income  
10 Earner in the household and is classified as follows: AB managerial/professional; C1 supervisory; C2  
11 skilled manual; D semi-skilled/unskilled manual; E casual workers/unemployed.<sup>21</sup>  
12  
13

#### 14 *Patient and Public Involvement Statement*

15  
16  
17  
18 The study was supported by a PPI group who provided input into the contents of the survey. A group  
19 of 10 screening-eligible women were invited to guide and refine the survey questions. Women who  
20 were both up-to-date and overdue were represented in the group. The group helped to establish the  
21 perceived difficulty of the questions (e.g. unknown terms, ambiguous concepts, long and overly  
22 complex questions) and omissions from the survey. The questions and response options were  
23 tailored based on feedback provided by this PPI group.  
24  
25

#### 26 *Analyses*

27  
28  
29 All analyses were conducted using IBM SPSS version 22. Chi-squared analyses were conducted to  
30 test for significant differences in participant demographics between 'Intenders' and 'Maintainers'.  
31 Descriptive statistics were conducted to assess booking history and smartphone/mobile phone  
32 ownership across all participants. For each of the six practical barrier statements, any positively-  
33 framed items were reverse-scored so that a higher score was indicative of a barrier for all items.  
34 Total practical barrier scores were created by allocating a score of 1 for each barrier statement that  
35 a participant 'agreed' or 'strongly agreed' with and adding these together (possible range 0-6).  
36 Independent samples t-tests were conducted to assess differences in the mean barriers scores  
37 between 'intenders' and 'maintainers'. A series of binary logistic regressions were then conducted to  
38 assess the associations between endorsing each barrier/booking attribute and the unadjusted odds  
39 for being an 'intender' (versus a 'maintainer'). A series of univariable logistic regressions were  
40 conducted to explore whether socio-demographic factors, screening status and number of practical  
41 barriers reported were associated with invitation (acceptable v unacceptable/ambivalent) and  
42 booking preferences (likely to use v unlikely to use/ambivalent). Participants responding don't know  
43 or not applicable were excluded. Multivariable logistic regressions are presented as supplementary  
44 material.  
45  
46  
47  
48  
49  
50  
51  
52  
53  
54  
55  
56

#### 57 **Results**

### *Sample characteristics*

2509 eligible respondents (i.e. women aged 25-64 years) completed the Kantar TNS survey. After exclusions, 1548 (78%) were up-to-date and 445 (22%) were overdue for screening. Our questions on invitation and booking preferences for cervical screening were asked to all women who were classified as 'intenders' and women who were classified as 'maintainers' in week 1. See Online Supplement 2 for survey inclusion flow diagram.

Sample characteristics for participants classified as 'intenders' (n=255) and 'maintainers' (n=359) are presented in Table 1. Mean age was 41.69 years (SD=10.84, range: 25-64 years), the majority self-identified as White (89%), were employed (64%), married or co-habiting (67%) and had regular caring responsibilities (i.e. for children/parents; 63%). 'Intenders' (mean=39.41; SD=9.94) were significantly younger than 'maintainers' (mean=43.31; SD=11.16);  $t(612)=4.47, p<.001$ .

The majority of women had previously booked by phoning the practice (89%), over one-third had booked in person (39%) and 14% had booked on a website. 'Maintainers' were significantly more likely to have previously booked on a website than 'intenders' (see Table 1). The majority of participants had a smartphone (87%), fewer women had a mobile phone which was not a smartphone (11%) and a small minority had no mobile phone (2%).

### *Practical barriers to appointment booking and desired attributes*

Over two-thirds of women reported one or more barriers to booking (69%); mean number of reported barriers was 1.21 (SD=1.06). 'Intenders' (mean=1.36; SD=1.06) reported slightly more barriers than 'maintainers' overall (mean=1.10; SD=1.04;  $t(612)=3.03, p<0.01$ ). The most commonly endorsed barrier was 'I find it difficult to get through to a receptionist when I phone my GP practice' (50% of participants 'strongly agreed' or 'agreed'), followed by 'It is difficult for me to call my GP practice during their opening hours' (31%) and 'I might forget to book an appointment after reading this letter' (31%). Practical barriers to appointment booking and booking characteristics considered to be important are outlined in Table 2. The 'intenders' group were significantly more likely to endorse the statement 'I might forget to book an appointment after reading this letter' than 'maintainers'. 'Intenders' were also more likely to state 'How long it takes to book the appointment' was important to them than 'maintainers'.

### *Invitation preferences*

Posted letters emerged as the most acceptable invitation mode followed by text-messages (see Table 3). Socio-demographic predictors of the acceptability of each modality are shown in Table 3. Text-message, email and mobile call invitations were less acceptable to women aged 55-64; these associations remained significant in multivariable analyses (see Online Supplement 3). Mobile and

landline call invites were more acceptable to women from lower socio-economic backgrounds and this remained significant in multivariable analyses for mobile invites. Reasons for considering invitation modes as unacceptable are provided in Online Supplement 4; fears about missing a phone call/email or text and privacy concerns were commonly cited. Many participants also reported they had no landline phone.

#### *Phone-based booking preferences*

Most women said they were likely to book by phoning their GP practice (90%; see Table 4). Older women were significantly less likely to say they would call a 24-hour automated service than women aged 25-34 (44% vs 63%). Women with caring responsibilities were more likely to say they would request a call-back compared to women with no caring responsibilities (63% vs 51%). 'Maintainers' were less likely to say they would request a call-back than 'intenders' (54% vs 66%). These associations remained significant in multivariable analyses. Women who cited three or more barriers were more likely to say they would call a 24-hour automated service but this association was not significant in multivariable analyses.

#### *Online booking preferences*

Booking on a website using a smartphone (59%) was the preferred online booking method (see Table 5). Older women (55-64 years) were less likely to say they would book online than younger women (25-34 years). Women in lower social grades were less likely than women in the highest grade to state they would book on a website, either using a desktop or smartphone. Participants who were studying or retired were less likely than those employed to say they would book online (either on a website using a smartphone: 41% vs 64%, or through an app: 22% vs 54%). Women who reported two or more barriers were more likely to report that they would use all online booking methods compared to women who reported no barriers (see Table 5). Age, social grade, employment status and number of barriers remained significant in multivariable analyses.

### **Discussion**

This study examined women's practical barriers to booking a cervical screening appointment and assessed whether invitation and booking preferences are associated with reported barriers, socio-demographic factors and screening status. Approximately one-third of all women reported that it is difficult to phone their GP practice within opening hours and half reported that it is difficult to get through to a receptionist. Although the survey found that 'intenders' experience slightly more practical barriers to screening than 'maintainers', endorsement of barriers across the sample suggests that both groups need more support in booking an appointment.

1  
2  
3  
4  
5 'Intenders' were more likely to report that they would forget to book an appointment after reading  
6 the screening letter than 'maintainers'. This key problem relates to a 'failure to get started', which is  
7 a first barrier people face between forming an intention and translating this into behaviour.<sup>15</sup>  
8  
9  
10 Written reminders are an integral part of the screening programme and there is good evidence to  
11 show these improve uptake,<sup>16</sup> but in their current format these reminders do not seem to help all  
12 women to remember to book their appointment. Future research might explore methods of  
13 increasing the salience of cervical screening among invitees (e.g. employing implementation  
14 intentions).<sup>22</sup> The use of text-message reminders has shown promise in other screening contexts.<sup>23</sup>  
15  
16  
17 'Intenders' were also more likely to say that the length of time needed to book an appointment was  
18 important to them. Since all women eligible for cervical screening fall within the working age  
19 population, and GP opening hours generally overlap with working hours, it is likely this cohort face  
20 competing obligations,<sup>24</sup> and, as a result 'fail to keep their goal on track'.<sup>15</sup> The rate of female  
21 employment (16 to 64 years) has increased from 62.2% in 1994, when coverage was high (85%; five  
22 yearly coverage for women aged 20 to 64)<sup>25</sup> to 70.5% in 2017.<sup>26</sup> Alternative booking methods may  
23 provide more flexibility.  
24  
25  
26  
27  
28  
29  
30

31  
32 Women who reported more barriers showed greater interest in using alternative booking methods.  
33 Specifically, participants who reported two or more barriers were more likely to say that they would  
34 book on a website or through an app. This is perhaps not surprising since these methods overcome  
35 the most common practical barriers highlighted by participants, including, difficulty getting through  
36 to a receptionist and difficulty calling the practice during opening hours; hence they 'fail to close'.  
37  
38 Nevertheless, while 24-hour automated services offers these same advantages, consistent with  
39 previous national surveys,<sup>27</sup> fewer women reported that they would use this booking option. Online  
40 booking services are already set up in the majority of GP practices across England for GP  
41 appointments, however a national survey found that over 40% of patients are unaware if there are  
42 online booking services at their GP practice.<sup>28</sup> Hence, signposting online booking services, if  
43 available for nurse appointments, to groups of the screening-eligible population (i.e. younger  
44 women who are more likely to be 'intenders') may be an effective means of increasing uptake. This  
45 survey suggests that there are likely to be age and socio-economic inequalities in the use of online  
46 bookings. For example, women aged 45-54 years and women age 55-64 showed less interest in  
47 using online booking methods. Thus, ensuring that traditional telephone booking options remains  
48 available is important.  
49  
50  
51  
52  
53  
54  
55  
56  
57  
58  
59  
60



1  
2  
3 Previous research has found that it is very difficult for individuals to maintain intentions after even  
4 very brief periods of time (less than one minute), especially in circumstances where there are  
5 competing tasks.<sup>29</sup> Unlike posted letters, which may not be read until the end of the day, text-  
6 messages can be delivered at a time when GP practices are open, so women can act immediately on  
7 their intentions to book an appointment. Given that text-message invites were considered  
8 acceptable to the majority of women across all socio-demographic backgrounds, and have  
9 previously been found to be effective in increasing uptake for other national screening  
10 programmes,<sup>23</sup> the use of text-message invitations may be a worthwhile intervention to explore.  
11 Text-messages within the cervical screening programme have, thus far, been introduced as a  
12 booking reminder, rather than as a stand-alone invitation, which the current study did not specify.  
13 Some participants shared concerns that they may miss the message; outlining that text-messages  
14 would be used as a supplemental invitation may have further increased acceptability within the  
15 sample. Further research is needed to explore methods of overcoming privacy concerns associated  
16 with text-messages, which some of the participants raised.

17  
18  
19  
20  
21  
22  
23  
24  
25  
26  
27  
28 This study had some limitations. We were unable to collect data on women who elected not to  
29 participate in the study. Hence the response rate and differences between respondents and non-  
30 respondents could not be determined. Women in the survey tended to be slightly less deprived and  
31 were less likely to be from ethnic minority backgrounds than the population represented in the most  
32 recent Census.<sup>30</sup> This suggests there was a slight bias in participation. This survey was also conducted  
33 in English and therefore non-English speakers were not represented. Given ethnic disparities in  
34 screening attendance in England,<sup>31</sup> more work is needed to explore methods of overcoming practical  
35 barriers to screening for ethnic minority women.

36  
37  
38  
39  
40  
41  
42  
43 Participation in screening was self-reported. Previous research has found that women tend to over-  
44 report their participation in cervical screening programmes,<sup>32, 33</sup> thus some of the women classified  
45 as 'maintainers' may actually be overdue for screening. Furthermore, although this study explored  
46 practical barriers to appointment-booking based on the TRIALS model,<sup>15</sup> several other practical  
47 barriers were not assessed. For example, previous research has found that 'intenders' are more  
48 likely to have children under the age of five;<sup>11</sup> childcare may be an additional practical barrier to  
49 screening. Thus the barriers cited in this study are not exhaustive of all practical barriers to screening  
50 for women. In addition, the study was designed to reflect the current booking process for cervical  
51 screening in Great Britain. While there may be parallels with other countries that have call-recall  
52 programs with paper-based invitations and self-booked appointments in primary care, the findings  
53  
54  
55  
56  
57  
58  
59  
60

1  
2  
3 may not be generalisable to screening programmes in other countries, where the invitation and  
4 booking approach differs.  
5  
6  
7

8 Nevertheless, this was the first study to assess preferences for booking a screening appointment in  
9 Great Britain, an important first step in the development of trialling and implementing any of these  
10 changes. The invitation and booking process was broken down to identify barriers at each stage and  
11 associated preferences which may help women to overcome such barriers. The lack of differences by  
12 screening status suggests that changing the architecture should not deter 'maintainers' from  
13 participation. Future interventions may assess the efficacy of i) signposting invitees to online  
14 booking services, ii) text-messages which are delivered during GP opening hours and iii) sending  
15 reminders to reduce the likelihood of forgetting to book an appointment. Implementation research  
16 will further determine how best to introduce such changes to the screening infrastructure.  
17  
18  
19  
20  
21  
22  
23  
24  
25  
26  
27  
28  
29  
30  
31  
32  
33  
34  
35  
36  
37  
38  
39  
40  
41  
42  
43  
44  
45  
46  
47  
48  
49  
50  
51  
52  
53  
54  
55  
56  
57  
58  
59  
60

Table 1:

*Sample Characteristics (n=614)*

|                                 | Overall<br>(n=614) | Maintainers<br>(n=359) | Intenders<br>(n=255) | Difference between<br>maintainers and intenders |
|---------------------------------|--------------------|------------------------|----------------------|-------------------------------------------------|
|                                 | N (%)              | N (%)                  | N (%)                | Chi Square (df), P-value                        |
| <b>Age (years)</b>              |                    |                        |                      | 14.16 (3), <.001                                |
| 25-34                           | 192 (31.3)         | 103 (28.7)             | 89 (34.9)            |                                                 |
| 35-44                           | 183 (29.8)         | 95 (26.5)              | 88 (34.5)            |                                                 |
| 45-54                           | 137 (22.3)         | 88 (24.5)              | 49 (19.2)            |                                                 |
| 55-64                           | 102 (16.6)         | 73 (20.3)              | 29 (11.4)            |                                                 |
| <b>Ethnicity</b>                |                    |                        |                      | 0.10 (1), 0.76                                  |
| Any white                       | 547 (89.1)         | 321 (89.4)             | 226 (88.6)           |                                                 |
| All other groups                | 67 (10.9)          | 38 (10.6)              | 29 (11.4)            |                                                 |
| <b>Education level</b>          |                    |                        |                      | 2.12 (4), 0.71                                  |
| GCSE or below                   | 180 (29.3)         | 108 (30.1)             | 72 (28.2)            |                                                 |
| A level or equivalent           | 71 (11.6)          | 45 (12.5)              | 26 (10.2)            |                                                 |
| College qualification           | 115 (18.7)         | 62 (17.3)              | 53 (20.8)            |                                                 |
| Degree or higher                | 213 (34.7)         | 125 (34.8)             | 88 (34.5)            |                                                 |
| Other                           | 35 (5.7)           | 19 (5.3)               | 16 (6.3)             |                                                 |
| <b>Employment status</b>        |                    |                        |                      | 3.19 (2), 0.20                                  |
| Employed (full-time/part-time)  | 392 (63.8)         | 234 (65.2)             | 158 (62.0)           |                                                 |
| Unemployed                      | 182 (29.6)         | 98 (27.3)              | 84 (32.9)            |                                                 |
| Other (studying/retired)        | 40 (6.5)           | 27 (7.5)               | 13 (5.1)             |                                                 |
| <b>Marital status</b>           |                    |                        |                      | 2.89 (2), 0.24                                  |
| Single                          | 129 (21.0)         | 67 (18.7)              | 62 (24.3)            |                                                 |
| Married/living as married       | 413 (67.3)         | 249 (69.4)             | 164 (64.3)           |                                                 |
| Widowed/divorced/separated      | 72 (11.7)          | 43 (12.0)              | 29 (11.4)            |                                                 |
| <b>Parent/carer role</b>        |                    |                        |                      | 0.62 (0.45), 0.43                               |
| Yes                             | 387 (63.0)         | 221 (61.6)             | 166 (65.1)           |                                                 |
| No                              | 222 (36.2)         | 134 (37.3)             | 88 (34.5)            |                                                 |
| <b>Social status</b>            |                    |                        |                      | 7.93 (4), 0.09                                  |
| AB (highest)                    | 134 (21.8)         | 90 (25.1)              | 44 (17.3)            |                                                 |
| C1                              | 157 (25.6)         | 88 (24.5)              | 69 (27.1)            |                                                 |
| C2                              | 142 (23.1)         | 84 (23.4)              | 58 (22.7)            |                                                 |
| D                               | 93 (15.1)          | 54 (15.0)              | 39 (15.3)            |                                                 |
| E (lowest)                      | 88 (14.3)          | 43 (12.0)              | 45 (17.6)            |                                                 |
| <b>Booking history (Yes/No)</b> |                    |                        |                      |                                                 |
| Phoned the practice             | 545 (88.8)         | 316 (88.0)             | 229 (89.8)           | 0.47 (1), 0.49                                  |
| At reception (in person)        | 240 (39.1)         | 145 (40.4)             | 95 (37.3)            | 0.62 (1), 0.43                                  |
| 24-hr automated service         | 23 (3.7)           | 14 (3.9)               | 9 (3.5)              | 0.06 (1), 0.81                                  |
| Text-message                    | 7 (1.1)            | 4 (1.1)                | 3 (1.2)              | 0.01 (1), 0.94                                  |
| Website                         | 85 (13.8)          | 60 (16.7)              | 25 (9.8)             | 5.97 (1), <.05                                  |
| Smartphone app                  | 23 (3.7)           | 15 (4.2)               | 8 (3.1)              | 0.45 (1), 0.50                                  |
| <b>Phone ownership</b>          |                    |                        |                      | 0.72 (2), 0.70                                  |
| Smartphone                      | 533 (86.8)         | 315 (87.7)             | 218 (85.5)           |                                                 |
| Non-smartphone mobile           | 67 (10.9)          | 36 (10.0)              | 31 (12.2)            |                                                 |
| No phone                        | 14 (2.3)           | 8 (2.2)                | 6 (2.4)              |                                                 |

Table 2:

Practical barriers to appointment booking and booking characteristics considered to be important (n=614)

|                                                                                                        | All<br>(n=614)<br>N (%) | 'Maintainers'<br>(n=359)<br>N (%) | 'Intenders'<br>(n=255)<br>N (%) | OR for being<br>an 'intender' (95% CI) |
|--------------------------------------------------------------------------------------------------------|-------------------------|-----------------------------------|---------------------------------|----------------------------------------|
| <b>Practical barriers to booking screening (% agree/strongly agree)</b>                                |                         |                                   |                                 |                                        |
| It is ( <i>not</i> ) easy for me to find time to read a letter like this                               | 25 (4.1)                | 15 (4.2)                          | 10 (3.9)                        | 0.94 (0.41-2.12)                       |
| I might forget to book an appointment after reading this letter                                        | 187 (30.5)              | 76 (21.2)                         | 111 (43.5)                      | 2.87 (2.01-4.09)**                     |
| It is difficult for me to call my GP practice during their opening hours                               | 192 (31.3)              | 108 (30.1)                        | 84 (32.9)                       | 1.14 (0.81-1.61)                       |
| I ( <i>do not</i> ) have access to a telephone/mobile with phone credit/minutes to call my GP practice | 13 (2.1)                | 8 (2.2)                           | 5 (2.0)                         | 0.88 (0.28-2.71)                       |
| I would ( <i>not</i> ) find it easy to find the phone number for my GP practice to contact them        | 19 (3.1)                | 11 (3.1)                          | 8 (3.1)                         | 1.01 (0.41-2.59)                       |
| I find it difficult to get through to a receptionist when I phone my GP practice                       | 306 (49.8)              | 177 (49.3)                        | 129 (50.6)                      | 1.05 (0.76-1.45)                       |
| <b>Booking attributes (% saying quite/very important)</b>                                              |                         |                                   |                                 |                                        |
| Ease of booking                                                                                        | 519 (84.5)              | 305 (85.0)                        | 214 (83.9)                      | 0.92 (0.59-1.44)                       |
| Choice of appointments                                                                                 | 486 (79.2)              | 280 (78.0)                        | 206 (80.8)                      | 1.19 (0.83-1.77)                       |
| Being able to change an appointment after booking                                                      | 474 (77.2)              | 274 (76.3)                        | 200 (78.4)                      | 1.13 (0.77-1.66)                       |
| How long it takes to book appointment                                                                  | 424 (69.1)              | 235 (65.5)                        | 189 (74.1)                      | 1.51 (1.06-2.15)*                      |
| Waiting time for next available appointment                                                            | 428 (69.7)              | 245 (68.2)                        | 183 (71.8)                      | 1.18 (0.83-1.68)                       |
| Privacy when booking appointment                                                                       | 410 (66.8)              | 230 (64.1)                        | 180 (70.6)                      | 1.35 (0.95-1.90)                       |
| Being able to talk with a healthcare professional when booking                                         | 345 (56.2)              | 195 (54.3)                        | 150 (58.8)                      | 1.20 (0.87-1.66)                       |
| Being able to book an appointment when the GP practice is shut                                         | 284 (46.3)              | 173 (48.2)                        | 111 (43.5)                      | 0.83 (0.60-1.15) <sup>a</sup>          |
| Cost of making booking (i.e. phone credit)                                                             | 166 (27.0)              | 94 (26.2)                         | 72 (28.2)                       | 1.11 (0.77-1.59)                       |

Note. OR= odds ratio; CI= confidence interval; \*p<0.05, \*\*p<0.001, <sup>a</sup>30% missing data for this variable

Table 3:

*Univariable logistic regression models of predictors of the acceptability of cervical screening invitation modalities*

|                                | Posted letter<br>(n=598) |                   | Text-message<br>(n=597) |                     | Email<br>(n=592) |                     | Mobile phone call<br>(n=598) |                     | Landline phone call<br>(n=576) |                    |
|--------------------------------|--------------------------|-------------------|-------------------------|---------------------|------------------|---------------------|------------------------------|---------------------|--------------------------------|--------------------|
|                                | %                        | OR (95% CI)       | %                       | OR (95% CI)         | %                | OR (95% CI)         | %                            | OR (95% CI)         | %                              | OR (95% CI)        |
| <b>All participants</b>        | 92.5                     | 1.00              | 80.7                    | 1.00                | 75.2             | 1.00                | 75.8                         | 1.00                | 62.3                           | 1.00               |
| <b>Age group</b>               |                          |                   |                         |                     |                  |                     |                              |                     |                                |                    |
| 25-34                          | 94.7                     | 1.00              | 86.7                    | 1.00                | 80.9             | 1.00                | 82.4                         | 1.00                | 65.0                           | 1.00               |
| 35-44                          | 92.1                     | 0.66 (0.28-1.52)  | 84.2                    | 0.82 (0.46-1.46)    | 78.2             | 0.85 (0.51-1.41)    | 80.8                         | 0.90 (0.53-1.52)    | 67.5                           | 1.12 (0.72-1.74)   |
| 45-54                          | 87.5                     | 0.40 (0.18-0.89)* | 78.7                    | 0.57 (0.31-1.02)    | 74.1             | 0.68 (0.40-1.15)    | 69.1                         | 0.48 (0.28-0.80)*   | 53.4                           | 0.62 (0.39-0.98)*  |
| 55-64                          | 95.9                     | 1.33 (0.41-4.35)  | 65.6                    | 0.29 (0.16-0.53)*** | 60.0             | 0.36 (0.21-0.62)*** | 62.9                         | 0.36 (0.21-0.63)*** | 60.4                           | 0.82 (0.49-1.37)   |
| <b>Social grade</b>            |                          |                   |                         |                     |                  |                     |                              |                     |                                |                    |
| AB                             | 91.6                     | 1.00              | 77.9                    | 1.00                | 81.3             | 1.00                | 64.6                         | 1.00                | 51.6                           | 1.00               |
| C1                             | 91.2                     | 0.95 (0.41-2.19)  | 81.8                    | 1.27 (0.71-2.29)    | 78.2             | 0.83 (0.46-1.50)    | 71.6                         | 1.38 (0.83-2.29)    | 57.0                           | 1.25 (0.77-2.01)   |
| C2                             | 97.2                     | 3.14 (0.97-10.12) | 79.4                    | 1.10 (0.62-1.96)    | 73.0             | 0.63 (0.35-1.12)    | 82.4                         | 2.56 (1.46-4.50)**  | 67.9                           | 1.99 (1.21-3.27)** |
| D                              | 95.6                     | 1.99 (0.61-6.47)  | 86.8                    | 1.87 (0.90-3.90)    | 79.1             | 0.87 (0.45-1.71)    | 79.1                         | 2.08 (1.12-3.86)*   | 67.8                           | 1.98 (1.12-3.49)** |
| E                              | 85.2                     | 0.53 (0.23-1.24)  | 79.1                    | 1.07 (0.55-2.09)    | 60.0             | 0.35 (0.19-0.64)*   | 85.1                         | 3.12 (1.56-6.22)**  | 73.2                           | 2.56 (1.41-4.66)** |
| <b>Employment</b>              |                          |                   |                         |                     |                  |                     |                              |                     |                                |                    |
| Employed                       | 93.0                     | 1.00              | 80.3                    | 1.00                | 77.8             | 1.00                | 73.6                         | 1.00                | 58.2                           | 1.00               |
| Unemployed                     | 89.8                     | 0.66 (0.36-1.24)  | 82.9                    | 1.19 (0.75-1.90)    | 70.5             | 0.68 (0.46-1.02)    | 84.0                         | 1.89 (1.19-3.00)**  | 72.0                           | 1.84 (1.25-2.74)** |
| Other (studying/retired)       | 100.0                    | -                 | 75.7                    | 0.77 (0.35-1.69)    | 69.4             | 0.65 (0.31-1.37)    | 59.5                         | 0.53 (0.26-1.06)    | 59.5                           | 1.05 (0.53-2.09)   |
| <b>Ethnicity</b>               |                          |                   |                         |                     |                  |                     |                              |                     |                                |                    |
| Any white                      | 93.3                     | 1.00              | 79.6                    | 1.00                | 73.5             | 1.00                | 74.9                         | 1.00                | 61.4                           | 1.00               |
| All other groups               | 85.9                     | 0.44 (0.20-0.97)  | 90.5                    | 2.44 (1.02-5.80)*   | 88.9             | 2.88 (1.28-6.47)**  | 82.8                         | 1.61 (0.82-3.18)    | 69.8                           | 1.46 (0.83-2.57)   |
| <b>Caring responsibilities</b> |                          |                   |                         |                     |                  |                     |                              |                     |                                |                    |
| No                             | 91.7                     | 1.00              | 78.0                    | 1.00                | 71.8             | 1.00                | 68.1                         | 1.00                | 58.7                           | 1.00               |
| Yes                            | 92.9                     | 1.19 (0.64-2.22)  | 82.2                    | 1.30 (0.86-1.97)    | 77.0             | 1.31 (0.90-1.92)    | 80.1                         | 1.88 (1.29-2.76)**  | 64.3                           | 1.27 (0.90-1.80)   |
| <b>Screening status</b>        |                          |                   |                         |                     |                  |                     |                              |                     |                                |                    |
| Intender                       | 91.1                     | 1.00              | 82.2                    | 1.00                | 75.1             | 1.00                | 76.5                         | 1.00                | 61.9                           | 1.00               |
| Maintainer                     | 93.4                     | 1.38 (0.75-2.54)  | 79.7                    | 0.85 (0.56-1.29)    | 75.2             | 1.01 (0.69-1.47)    | 75.2                         | 0.93 (0.64-1.36)    | 62.6                           | 1.03 (0.73-1.45)   |
| <b>Practical barriers</b>      |                          |                   |                         |                     |                  |                     |                              |                     |                                |                    |
| 0 barriers                     | 94.0                     | 1.00              | 81.0                    | 1.00                | 73.1             | 1.00                | 77.6                         | 1.00                | 60.7                           | 1.00               |
| 1 barrier                      | 94.1                     | 1.02 (0.43-2.42)  | 79.1                    | 0.89 (0.54-1.48)    | 73.7             | 1.03 (0.64-1.64)    | 75.9                         | 0.91 (0.56-1.48)    | 60.4                           | 0.99 (0.65-1.51)   |
| 2 barriers                     | 92.5                     | 0.79 (0.33-1.87)  | 81.6                    | 1.04 (0.60-1.82)    | 77.2             | 1.25 (0.75-2.08)    | 73.6                         | 0.81 (0.49-1.34)    | 65.0                           | 1.20 (0.76-1.91)   |
| 3 or more barriers             | 84.8                     | 0.36 (0.15-0.84)* | 82.3                    | 1.09 (0.55-2.16)    | 79.7             | 1.45 (0.77-2.75)    | 75.0                         | 0.87 (0.47-1.60)    | 65.8                           | 1.25 (0.71-2.19)   |

Note. Reference group: 'unacceptable/ambivalent'. OR= unadjusted odds ratio; CI= confidence interval; \*p<0.05, \*\*p<0.01, \*\*\*p<0.05

Table 4

Univariable logistic regression models of predictors of phone-based booking preferences

|                                | Calling the GP<br>(n=596) |                   | Calling a 24-hour automated service<br>(n=590) |                    | Requesting a call-back<br>(n=593) |                    |
|--------------------------------|---------------------------|-------------------|------------------------------------------------|--------------------|-----------------------------------|--------------------|
|                                | % likely to book by..     | OR (95% CI)       | % likely to book by..                          | OR (95% CI)        | % likely to book by..             | OR (95% CI)        |
| <b>All participants</b>        | 92.3                      |                   | 53.7                                           |                    | 59.0                              |                    |
| <b>Age group</b>               |                           |                   |                                                |                    |                                   |                    |
| 25-34                          | 93.0                      | 1.00              | 63.2                                           | 1.00               | 61.0                              | 1.00               |
| 35-44                          | 92.7                      | 0.94 (0.42-2.09)  | 54.8                                           | 0.71 (0.46-1.07)   | 64.2                              | 1.15 (0.75-1.76)   |
| 45-54                          | 89.7                      | 0.65 (0.30-1.43)  | 45.9                                           | 0.49 (0.31-0.78)** | 48.9                              | 0.61 (0.39-0.96)*  |
| 55-64                          | 93.8                      | 1.12 (0.41-3.05)  | 44.2                                           | 0.46 (0.28-0.76)** | 60.0                              | 0.96 (0.58-1.59)   |
| <b>Social grade</b>            |                           |                   |                                                |                    |                                   |                    |
| AB                             | 91.5                      | 1.00              | 51.5                                           | 1.00               | 55.4                              | 1.00               |
| C1                             | 91.8                      | 1.04 (0.44-2.44)  | 53.1                                           | 1.07 (0.33-1.71)   | 52.7                              | 0.90 (0.56-1.45)   |
| C2                             | 93.6                      | 1.36 (0.54-3.39)  | 58.9                                           | 1.35 (0.83-2.18)   | 60.3                              | 1.22 (0.75-1.98)   |
| D                              | 94.5                      | 1.59 (0.53-4.74)  | 54.4                                           | 1.12 (0.66-1.93)   | 65.6                              | 1.53 (0.88-2.67)   |
| E                              | 89.7                      | 0.80 (0.32-2.02)  | 48.8                                           | 0.90 (0.52-1.55)   | 66.3                              | 1.58 (0.90-2.79)   |
| <b>Employment</b>              |                           |                   |                                                |                    |                                   |                    |
| Employed                       | 91.7                      | 1.00              | 51.3                                           | 1.00               | 57.3                              | 1.00               |
| Unemployed                     | 92.6                      | 1.14 (0.58-2.23)  | 52.3                                           | 0.92 (0.64-1.32)   | 63.6                              | 1.30 (0.91-1.88)   |
| Other (studying/retired)       | 97.2                      | 3.18 (0.42-23.99) | 54.3                                           | 1.00 (0.50-2.00)   | 54.3                              | 0.88 (0.44-1.77)   |
| <b>Ethnicity</b>               |                           |                   |                                                |                    |                                   |                    |
| Any white                      | 92.3                      | 1.00              | 52.3                                           | 1.00               | 58.2                              | 1.00               |
| All other groups               | 92.2                      | 0.99 (0.38-2.59)  | 65.6                                           | 1.74 (1.01-3.00)   | 65.6                              | 1.37 (0.80-2.36)   |
| <b>Caring responsibilities</b> |                           |                   |                                                |                    |                                   |                    |
| No                             | 93                        | 1.00              | 53.3                                           | 1.00               | 51.4                              | 1.00               |
| Yes                            | 91.9                      | 0.85 (0.45-1.62)  | 54.0                                           | 1.03 (0.73-1.44)*  | 63.3                              | 1.63 (1.16-2.29)** |
| <b>Screening status</b>        |                           |                   |                                                |                    |                                   |                    |
| Intender                       | 91.1                      | 1.00              | 56.1                                           | 1.00               | 65.7                              | 1.00               |
| Maintainer                     | 93.1                      | 1.33 (0.73-2.44)  | 52.0                                           | 0.85 (0.61-1.18)   | 54.3                              | 0.62 (0.44-0.90)** |
| <b>Practical barriers</b>      |                           |                   |                                                |                    |                                   |                    |
| 0 barriers                     | 93.4                      | 1.00              | 50.9                                           | 1.00               | 57.2                              | 1.00               |
| 1 barrier                      | 93.6                      | 1.04 (0.46-2.38)  | 48.4                                           | 0.92 (0.61-1.38)   | 53.7                              | 0.87 (0.58-1.31)   |
| 2 barriers                     | 93.9                      | 1.09 (0.45-2.66)  | 59.0                                           | 1.41 (0.91-2.19)   | 64.8                              | 1.38 (0.88-2.16)   |
| 3 or more barriers cited       | 83.8                      | 0.37 (0.16-0.84)* | 64.1                                           | 1.75 (1.01-3.02)*  | 65.0                              | 1.39 (0.80-2.40)   |

Note. Reference group: 'not likely to use/ambivalent'. OR= unadjusted odds ratio; CI= confidence interval; \*p<0.05, \*\*p<0.01, \*\*\*p<0.001

Table 5

Univariable logistic regression models of predictors of online booking preferences

|                                | Booking on a website using a desktop/laptop (n=589) |                     | Booking on a website using a smartphone <sup>a</sup> (n=513) |                     | Downloading an app to your smartphone <sup>a</sup> (n=517) |                     |
|--------------------------------|-----------------------------------------------------|---------------------|--------------------------------------------------------------|---------------------|------------------------------------------------------------|---------------------|
|                                | % likely to book by..                               | OR (95% CI)         | % likely to book by..                                        | OR (95% CI)         | % likely to book by..                                      | OR (95% CI)         |
| <b>All participants</b>        | 60.3                                                |                     | 58.8                                                         |                     | 49.1                                                       |                     |
| <b>Age group</b>               |                                                     |                     |                                                              |                     |                                                            |                     |
| 25-34                          | 71.0                                                | 1.00                | 74.5                                                         | 1.00                | 67.6                                                       | 1.00                |
| 35-44                          | 61.9                                                | 0.66 (0.43-1.03)    | 64.8                                                         | 0.63 (0.40-0.99)*   | 53.7                                                       | 0.56 (0.36-0.85)**  |
| 45-54                          | 55.2                                                | 0.50 (0.32-0.80)**  | 47.0                                                         | 0.30 (0.19-0.49)*** | 36.3                                                       | 0.27 (0.17-0.44)*** |
| 55-64                          | 43.8                                                | 0.32 (0.19-0.53)*** | 34.0                                                         | 0.18 (0.10-0.30)*** | 22.9                                                       | 0.14 (0.08-0.25)*** |
| <b>Social grade</b>            |                                                     |                     |                                                              |                     |                                                            |                     |
| AB                             | 72.3                                                | 1.00                | 70.0                                                         | 1.00                | 53.1                                                       | 1.00                |
| C1                             | 61.1                                                | 0.60 (0.36-1.00)    | 63.9                                                         | 0.76 (0.46-1.26)    | 53.4                                                       | 1.01 (0.63-1.63)    |
| C2                             | 59.3                                                | 0.56 (0.34-0.93)*   | 54.3                                                         | 0.51 (0.31-0.84)**  | 48.9                                                       | 0.85 (0.53-1.37)    |
| D                              | 58.2                                                | 0.53 (0.30-0.94)*   | 54.9                                                         | 0.52 (0.30-0.91)*   | 47.3                                                       | 0.79 (0.46-1.36)    |
| E                              | 44.0                                                | 0.30 (0.17-0.54)*** | 44.7                                                         | 0.35 (0.20-0.61)*** | 36.6                                                       | 0.53 (0.31-0.93)*   |
| <b>Employment</b>              |                                                     |                     |                                                              |                     |                                                            |                     |
| Employed                       | 64.5                                                | 1.00                | 63.7                                                         | 1.00                | 53.5                                                       | 1.00                |
| Unemployed                     | 52.6                                                | 0.61 (0.43-0.88)**  | 51.7                                                         | 0.61 (0.43-0.88)**  | 44.8                                                       | 0.71 (0.49-1.01)    |
| Other (studying/retired)       | 52.8                                                | 0.62 (0.31-1.22)    | 41.2                                                         | 0.40 (0.20-0.82)*   | 22.2                                                       | 0.25 (0.11-0.56)**  |
| <b>Ethnicity</b>               |                                                     |                     |                                                              |                     |                                                            |                     |
| Any white                      | 59.7                                                | 1.00                | 57.7                                                         | 1.00                | 48.4                                                       | 1.00                |
| All other groups               | 65.1                                                | 1.26 (0.73-2.17)    | 68.3                                                         | 1.58 (0.90-2.75)    | 54.7                                                       | 1.29 (0.77-2.17)    |
| <b>Caring responsibilities</b> |                                                     |                     |                                                              |                     |                                                            |                     |
| No                             | 60.6                                                | 1.00                | 54.2                                                         | 1.00                | 42.5                                                       | 1.00                |
| Yes                            | 60.1                                                | 0.98 (0.70-1.38)    | 61.4                                                         | 1.34 (0.96-1.89)    | 52.8                                                       | 1.51 (1.08-2.12)*   |
| <b>Screening status</b>        |                                                     |                     |                                                              |                     |                                                            |                     |
| Intender                       | 59.6                                                | 1.00                | 59.2                                                         | 1.00                | 52.8                                                       | 1.00                |
| Maintainer                     | 60.8                                                | 1.05 (0.75-1.47)    | 58.6                                                         | 0.98 (0.70-1.36)    | 46.4                                                       | 0.77 (0.56-1.07)    |
| <b>Practical barriers</b>      |                                                     |                     |                                                              |                     |                                                            |                     |
| 0 barriers                     | 50.8                                                | 1.00                | 48.9                                                         | 1.00                | 39                                                         | 1.00                |
| 1 barrier                      | 60.0                                                | 1.45 (0.96-2.20)    | 55.4                                                         | 1.30 (0.86-1.96)    | 45.2                                                       | 1.29 (0.85-1.95)    |
| 2 barriers                     | 67.4                                                | 2.00 (1.27-3.14)**  | 68.1                                                         | 2.23 (1.41-3.52)**  | 58.3                                                       | 2.19 (1.40-3.42)**  |
| 3 or more barriers             | 69.6                                                | 2.22 (1.27-3.89)**  | 73.1                                                         | 2.84 (1.59-5.07)*** | 64.6                                                       | 2.85 (1.65-4.93)*** |

Note. Reference group: 'not likely to use/ambivalent'. OR= unadjusted odds ratio; CI= confidence interval; \*p<0.05, \*\*p<0.01, \*\*\*p<0.001,

<sup>a</sup> participants with no smartphone removed from analyses (n = 81)

1  
2  
3 Contributorship statement

4 MR (Conceptualisation; Data analysis; Project administration; Writing – original draft; Writing –  
5 review & editing)

6  
7  
8 JW (Conceptualisation; Supervision; Writing – review & editing)

9 LM (Conceptualisation; Data analysis; Supervision; Writing – review & editing)

10 All authors approved the final manuscript as submitted.  
11  
12  
13

14  
15 Competing interests

16 The authors have no competing interests to declare.  
17  
18  
19

20 Funding

21 MR, JW and LM are supported by a Cancer Research UK Career Development Fellowship awarded to  
22 JW (C7492/A17219).  
23  
24  
25

26 Data sharing statement

27 Data used and analysed in the study are available from the corresponding author on request  
28 (l.marlow@ucl.ac.uk).  
29  
30  
31  
32

33 The Corresponding Author has the right to grant on behalf of all authors and does grant on behalf of  
34 all authors, a worldwide licence to the Publishers and its licensees in perpetuity, in all forms, formats  
35 and media (whether known now or created in the future), to i) publish, reproduce, distribute, display  
36 and store the Contribution, ii) translate the Contribution into other languages, create adaptations,  
37 reprints, include within collections and create summaries, extracts and/or, abstracts of the  
38 Contribution, iii) create any other derivative work(s) based on the Contribution, iv) to exploit all  
39 subsidiary rights in the Contribution, v) the inclusion of electronic links from the Contribution to  
40 third party material where-ever it may be located; and, vi) licence any third party to do any or all of  
41 the above.  
42  
43  
44  
45  
46  
47  
48  
49  
50  
51  
52  
53  
54  
55  
56  
57  
58  
59  
60



## References

1. NHS. Cervical Screening Programme, England 2016-17, National Statistics. In: Screening & Immunisations Team ND, (ed.). 2017.
2. Landy R, Pesola F, Castanon A, et al. Impact of cervical screening on cervical cancer mortality: estimation using stage-specific results from a nested case-control study. *British journal of cancer* 2016; 115: 1140-1146. 2016/10/26. DOI: 10.1038/bjc.2016.290.
3. Waller J, Jackowska M, Marlow L, et al. Exploring age differences in reasons for nonattendance for cervical screening: a qualitative study. *BJOG : an international journal of obstetrics and gynaecology* 2012; 119: 26-32. 2011/06/15. DOI: 10.1111/j.1471-0528.2011.03030.x.
4. Hope KA, Moss E, Redman CWE, et al. Psycho-social influences upon older women's decision to attend cervical screening: A review of current evidence. *Prev Med* 2017; 101: 60-66. 2017/05/16. DOI: 10.1016/j.ypmed.2017.05.002.
5. Douglas E, Waller J, Duffy SW, et al. Socioeconomic inequalities in breast and cervical screening coverage in England: are we closing the gap? *Journal of medical screening* 2016; 23: 98-103. 2015/09/18. DOI: 10.1177/0969141315600192.
6. Spencer AM, Roberts SA, Brabin L, et al. Sociodemographic factors predicting mother's cervical screening and daughter's HPV vaccination uptake. *Journal of epidemiology and community health* 2014; 68: 571-577. 2014/02/26. DOI: 10.1136/jech-2013-202629.
7. Sutton S and Rutherford C. Sociodemographic and attitudinal correlates of cervical screening uptake in a national sample of women in Britain. *Social Science & Medicine* 2005; 61: 2460-2465. DOI: <https://doi.org/10.1016/j.socscimed.2005.07.017>.
8. Young B, Bedford L, Kendrick D, et al. Factors influencing the decision to attend screening for cancer in the UK: a meta-ethnography of qualitative research. *Journal of public health (Oxford, England)* 2018; 40: 315-339. 2017/05/10. DOI: 10.1093/pubmed/idx026.
9. Marlow LAV, Ferrer RA, Chorley AJ, et al. Variation in health beliefs across different types of cervical screening non-participants. *Preventive Medicine* 2018; 111: 204-209. DOI: <https://doi.org/10.1016/j.ypmed.2018.03.014>.
10. Waller J, Bartoszek M, Marlow L, et al. Barriers to cervical cancer screening attendance in England: a population-based survey. *Journal of medical screening* 2009; 16: 199-204. 2010/01/08. DOI: 10.1258/jms.2009.009073.
11. Marlow LAV, Chorley AJ, Haddrell J, et al. Understanding the heterogeneity of cervical cancer screening non-participants: Data from a national sample of British women. *European journal of cancer (Oxford, England : 1990)* 2017; 80: 30-38. 2017/05/24. DOI: 10.1016/j.ejca.2017.04.017.
12. Sheeran P and Conner M. Improving the translation of intentions into health actions: The role of motivational coherence. *Health psychology : official journal of the Division of Health Psychology, American Psychological Association* 2017; 36: 1065-1073. 2017/08/22. DOI: 10.1037/hea0000553.
13. Sheeran P. Intention—Behavior Relations: A Conceptual and Empirical Review. *European review of social psychology* 2002; 12: 1-36. DOI: 10.1080/14792772143000003.
14. Weinstein ND. The precaution adoption process. *Health psychology : official journal of the Division of Health Psychology, American Psychological Association* 1988; 7: 355-386. 1988/01/01.
15. Sheeran P and Webb T. The Intention—Behavior Gap. *Social and Personality Psychology Compass* 2016; 10: 503-518. DOI: doi:10.1111/spc3.12265.
16. Everett T, Bryant A, Griffin MF, et al. Interventions targeted at women to encourage the uptake of cervical screening. *The Cochrane database of systematic reviews* 2011: CD002834. 2011/05/13. DOI: 10.1002/14651858.CD002834.pub2.
17. McDowell I, Newell C and Rosser W. Computerized reminders to encourage cervical screening in family practice. *The Journal of family practice* 1989; 28: 420-424. 1989/04/01.
18. Binstock MA, Geiger AM, Hackett JR, et al. Pap smear outreach: a randomized controlled trial in an HMO. *American journal of preventive medicine* 1997; 13: 425-426. 1998/01/07.

19. Duffy SW, Myles JP, Maroni R, et al. Rapid review of evaluation of interventions to improve participation in cancer screening services. *Journal of medical screening* 2017; 24: 127-145. 2016/10/19. DOI: 10.1177/0969141316664757.
20. Kitchener HC, Gittins M, Rivero-Arias O, et al. A cluster randomised trial of strategies to increase cervical screening uptake at first invitation (STRATEGIC). *Health technology assessment (Winchester, England)* 2016; 20: 1-138. 2016/09/17. DOI: 10.3310/hta20680.
21. Ipsos. Social grade: a classification tool. 2009.
22. Sheeran P and Orbell S. Using implementation intentions to increase attendance for cervical cancer screening. *Health Psychology* 2000; 19: 283.
23. Kerrison RS, Shukla H, Cunningham D, et al. Text-message reminders increase uptake of routine breast screening appointments: a randomised controlled trial in a hard-to-reach population. *British journal of cancer* 2015; 112: 1005-1010. 2015/02/11. DOI: 10.1038/bjc.2015.36.
24. Chorley AJ, Marlow LA, Forster AS, et al. Experiences of cervical screening and barriers to participation in the context of an organised programme: a systematic review and thematic synthesis. *Psycho-oncology* 2017; 26: 161-172. 2016/04/14. DOI: 10.1002/pon.4126.
25. Quinn M, Babb P, Jones J, et al. Effect of screening on incidence of and mortality from cancer of cervix in England: evaluation based on routinely collected statistics. *BMJ (Clinical research ed)* 1999; 318: 904-908. 1999/04/02.
26. ONS. Labour Force Survey. Office for National Statistics, 2011.
27. GPPS. GP Patient Survey National results and trends. 2017.
28. MORI I. The GP Patient Survey 2018. Ipsos MORI, 2018.
29. Einstein GO, McDaniel MA, Williford CL, et al. Forgetting of intentions in demanding situations is rapid. *Journal of experimental psychology Applied* 2003; 9: 147-162. 2003/10/23. DOI: 10.1037/1076-898x.9.3.147.
30. ONS. Ethnicity and National Identity in England and Wales: 2011. In: Statistics OfN, (ed.). 2011.
31. Johnson HC, Lafferty EI, Eggo RM, et al. Effect of HPV vaccination and cervical cancer screening in England by ethnicity: a modelling study. *The Lancet Public health* 2018; 3: e44-e51. 2018/01/09. DOI: 10.1016/s2468-2667(17)30238-4.
32. Howard M, Agarwal G and Lytwyn A. Accuracy of self-reports of Pap and mammography screening compared to medical record: a meta-analysis. *Cancer Causes & Control* 2008; 20: 1. journal article. DOI: 10.1007/s10552-008-9228-4.
33. Rauscher GH, Johnson TP, Cho YI, et al. Accuracy of Self-Reported Cancer-Screening Histories: A Meta-analysis. *Cancer Epidemiology Biomarkers & Prevention* 2008; 17: 748-757. DOI: 10.1158/1055-9965.epi-07-2629.

1  
2  
3 **Online Supplement 1: Could changing invitation and booking processes help women translate their**  
4 **cervical screening intentions into action? A population-based survey of women's preferences in**  
5 **Great Britain.**

6 (Mairead Ryan, Jo Waller and Laura Marlow)  
7  
8  
9

10 *Questionnaire*  
11  
12

13 Have you ever been diagnosed with cervical cancer?

- 14 1 Yes  
15 2 No  
16

17  
18 The next few questions in this section are about cervical screening, also known as a smear or a Pap  
19 test. The NHS Cervical Screening Programme invites women in England for a cervical screening,  
20 smear or Pap test every 3 years from age 25 to age 49 and every 5 years from age 50 to age 64.  
21 Which of these statements describes whether you have had a cervical screening? If you have had a  
22 cervical screening and can't remember when, please give your best estimate.

- 23 1 I have had a test within the last 3 years > INCLUDE (1)  
24 2 My last test was 3 to 5 years ago > INCLUDE (2)  
25 3 My last test was more than 5 years ago > INCLUDE (3)  
26 4 I have never been invited to have a test > EXCLUDE  
27 5 I have been invited but have never had a test > INCLUDE (4)  
28 6 I have had a hysterectomy so I don't need to have tests > EXCLUDE  
29 7 I have never heard of cervical screening > EXCLUDE  
30  
31

32 Will you go for cervical screening when next invited?

- 33 1 Definitely not > EXCLUDE  
34 2 Probably not > EXCLUDE  
35 3 Yes, probably > INCLUDE (a)  
36 4 Yes, definitely > INCLUDE (a)  
37  
38

39 NB: Participants were categorised as follows based on responses to the above questions:

40  
41 If answered 1 and a = maintainer

42  
43 If 25-49 years and answered 2 and a = intender

44  
45 If 50-64 and answered 2 and a = maintainer

46  
47 If answered 3 or 4 and a = intender  
48  
49  
50  
51

52 On the next screen will be an invitation letter that the NHS sends to women to invite them to book a  
53 cervical screening appointment. Most women book cervical screening appointments at their GP  
54 practice. I would like you to imagine you received this letter in the post. Please read the letter and  
55 afterwards you will be asked some questions about your response to the letter.  
56  
57

58 \* Picture of NHS screening letter shown to participant  
59  
60

1  
2  
3 I will now read a number of statements relating to the cervical screening letter you've just read.  
4 After each statement, please state the extent to which you agree, on a scale from 'strongly disagree  
5 'to 'strongly agree'.

6  
7 How much do you agree or disagree with this statement?

8 It is easy for me to find time to read a letter like this.

- 9  
10 1 Strongly disagree  
11 2 Disagree  
12 3 Neither disagree or agree  
13 4 Agree  
14 5 Strongly agree  
15

16 How much do you agree or disagree with this statement?

17 I might forget to book an appointment after reading this letter.

- 18  
19 1 Strongly disagree  
20 2 Disagree  
21 3 Neither disagree or agree  
22 4 Agree  
23 5 Strongly agree  
24

25 How much do you agree or disagree with this statement?

26 It is difficult for me to call my GP practice during their opening hours.

27 \*GP opening hours provided if necessary: "Opening hours are generally between 8.00am to 6.30pm  
28 Monday to Friday"

- 29  
30 1 Strongly disagree  
31 2 Disagree  
32 3 Neither disagree or agree  
33 4 Agree  
34 5 Strongly agree  
35

36 How much do you agree or disagree with this statement?

37 I have access to a telephone/mobile with phone credit/minutes to call my GP practice.

- 38  
39 1 Strongly disagree  
40 2 Disagree  
41 3 Neither disagree or agree  
42 4 Agree  
43 5 Strongly agree  
44

45  
46 How much do you agree or disagree with this statement?

47 It would be easy for me to find the phone number for my GP practice to contact them.

- 48  
49 1 Strongly disagree  
50 2 Disagree  
51 3 Neither disagree or agree  
52 4 Agree  
53 5 Strongly agree  
54  
55  
56  
57  
58  
59  
60

1  
2  
3 How much do you agree or disagree with this statement?

4 I find it takes too long to get through to a receptionist when I phone my GP practice.

- 5           1       Strongly disagree  
6           2       Disagree  
7           3       Neither disagree or agree  
8           4       Agree  
9           5       Strongly agree

10  
11  
12 We are interested in what is important to you in terms of booking a cervical screening appointment.  
13 For the following statements I read out, please state the extent to which you think each factor is  
14 important to you, on a scale from 'very unimportant' to 'very important' when booking an  
15 appointment at your GP practice.  
16

17 How important is this when booking a cervical screening appointment at your GP practice?

18 Ease of booking

- 19  
20           1       Very unimportant  
21           2       Quite unimportant  
22           3       Neither unimportant or important  
23           4       Quite important  
24           5       Very important

25  
26 How important is this when booking a cervical screening appointment at your GP practice?

27 Cost of making booking (i.e. phone credit)

- 28  
29           1       Very unimportant  
30           2       Quite unimportant  
31           3       Neither unimportant or important  
32           4       Quite important  
33           5       Very important

34  
35 How important is this when booking a cervical screening appointment at your GP practice?

36 Choice of appointment times

- 37  
38           1       Very unimportant  
39           2       Quite unimportant  
40           3       Neither unimportant or important  
41           4       Quite important  
42           5       Very important

43  
44 How important is this when booking a cervical screening appointment at your GP practice?

45 Being able to change an appointment time/day after booking it

- 46  
47           1       Very unimportant  
48           2       Quite unimportant  
49           3       Neither unimportant or important  
50           4       Quite important  
51           5       Very important

1  
2  
3 How important is this when booking a cervical screening appointment at your GP practice?

4 Privacy when booking an appointment

- 5 1 Very unimportant  
6 2 Quite unimportant  
7 3 Neither unimportant or important  
8 4 Quite important  
9 5 Very important  
10

11  
12 How important is this when booking a cervical screening appointment at your GP practice?

13 How long it takes to book an appointment

- 14 1 Very unimportant  
15 2 Quite unimportant  
16 3 Neither unimportant or important  
17 4 Quite important  
18 5 Very important  
19

20  
21 How important is this when booking a cervical screening appointment at your GP practice?

22 Being able to talk with a healthcare professional when booking (e.g. to ask questions about the  
23 screening before attending)

- 24 1 Very unimportant  
25 2 Quite unimportant  
26 3 Neither unimportant or important  
27 4 Quite important  
28 5 Very important  
29

30  
31 How important is this when booking a cervical screening appointment at your GP practice?

32 Time to the next available appointment (e.g. next available appointment isn't for two weeks)

- 33 1 Very unimportant  
34 2 Quite unimportant  
35 3 Neither unimportant or important  
36 4 Quite important  
37 5 Very important  
38

39  
40 How important is this when booking a cervical screening appointment at your GP practice?

41 Being able to book an appointment when the GP practice is shut (e.g. online booking)

42 \*GP opening hours provided if necessary: "Opening hours are generally between 8.00am to 6.30pm  
43 Monday to Friday"

- 44 1 Very unimportant  
45 2 Quite unimportant  
46 3 Neither unimportant or important  
47 4 Quite important  
48 5 Very important  
49

50  
51 Again thinking about the letter you read which is sent in the post to invite women to book a cervical  
52 screening appointment. We are interested in different forms of communication to invite women to  
53 book a cervical screening appointment.  
54

55 Please state the extent to which you think the following forms of communication are acceptable, on  
56 a scale from 'very unacceptable' to 'very acceptable'.  
57  
58  
59  
60

1  
2  
3 How acceptable is this form of communication when being invited to book a cervical screening  
4 appointment?

5 Posted letter

- 6 1 Very unacceptable  
7 2 Quite unacceptable  
8 3 Neither unacceptable or acceptable  
9 4 Quite acceptable  
10 5 Very acceptable  
11  
12

13 \* If participant responded 'Quite unacceptable' or 'Very unacceptable', participant subsequently  
14 asked: Please can you tell me why you would not find receiving an invitation for a cervical screening  
15 appointment by posted letter acceptable?

16 How acceptable is this form of communication when being invited to book a cervical screening  
17 appointment?

18 Text message

- 19 1 Very unacceptable  
20 2 Quite unacceptable  
21 3 Neither unacceptable or acceptable  
22 4 Quite acceptable  
23 5 Very acceptable  
24  
25

26 \* If participant responded 'Quite unacceptable' or 'Very unacceptable', participant subsequently  
27 asked: Please can you tell me why you would not find receiving an invitation for a cervical screening  
28 appointment by text message acceptable?  
29

30  
31 How acceptable is this form of communication when being invited to book a cervical screening  
32 appointment?

33 Email

- 34 1 Very unacceptable  
35 2 Quite unacceptable  
36 3 Neither unacceptable or acceptable  
37 4 Quite acceptable  
38 5 Very acceptable  
39  
40

41 \* If participant responded 'Quite unacceptable' or 'Very unacceptable', participant subsequently  
42 asked: Please can you tell me why you would not find receiving an invitation for a cervical screening  
43 appointment by email acceptable?  
44  
45  
46  
47  
48  
49  
50  
51  
52  
53  
54  
55  
56  
57  
58  
59  
60

1  
2  
3  
4 How acceptable is this form of communication when being invited to book a cervical screening  
5 appointment?

6 Phone call to your mobile phone

- 7  
8 1 Very unacceptable  
9 2 Quite unacceptable  
10 3 Neither unacceptable or acceptable  
11 4 Quite acceptable  
12 5 Very acceptable  
13

14 \* If participant responded 'Quite unacceptable' or 'Very unacceptable', participant subsequently  
15 asked: Please can you tell me why you would not find receiving an invitation for a cervical screening  
16 appointment by phone call to your mobile phone acceptable?  
17

18  
19 How acceptable is this form of communication when being invited to book a cervical screening  
20 appointment?

21 Phone call to your house landline

- 22 1 Very unacceptable  
23 2 Quite unacceptable  
24 3 Neither unacceptable or acceptable  
25 4 Quite acceptable  
26 5 Very acceptable  
27

28  
29 \* If participant responded 'Quite unacceptable' or 'Very unacceptable', participant subsequently  
30 asked: Please can you tell me why you would not find receiving an invitation for a cervical screening  
31 appointment by phone call to your house landline acceptable?  
32

33 Imagine now that different options were available to you to book a cervical screening appointment  
34 at your GP practice. Please state the extent to which you are likely to use each of the following  
35 methods to book an appointment.  
36

37 How likely are you to use this method to book a cervical screening appointment at your GP practice?

38 Calling your GP practice

- 39  
40 1 Very unlikely  
41 2 Quite unlikely  
42 3 Neither likely or unlikely  
43 4 Quite likely  
44 5 Very likely  
45

46 How likely are you to use this method to book a cervical screening appointment at your GP practice?

47 Calling a 24-hour automated telephone appointment-booking system

- 48  
49 1 Very unlikely  
50 2 Quite unlikely  
51 3 Neither likely or unlikely  
52 4 Quite likely  
53 5 Very likely  
54  
55  
56  
57  
58  
59  
60



1  
2  
3 How likely are you to use this method to book a cervical screening appointment at your GP practice?

4 Requesting a call-back from your GP practice

- 5 1 Very unlikely  
6 2 Quite unlikely  
7 3 Neither likely or unlikely  
8 4 Quite likely  
9 5 Very likely  
10

11  
12 How likely are you to use this method to book a cervical screening appointment at your GP practice?

13 Booking on a website using a desktop computer/laptop

- 14 1 Very unlikely  
15 2 Quite unlikely  
16 3 Neither likely or unlikely  
17 4 Quite likely  
18 5 Very likely  
19

20  
21 How likely are you to use this method to book a cervical screening appointment at your GP practice?

22 Booking on a website using a smartphone

- 23 1 Very unlikely  
24 2 Quite unlikely  
25 3 Neither likely or unlikely  
26 4 Quite likely  
27 5 Very likely  
28

29  
30 How likely are you to use this method to book a cervical screening appointment at your GP practice?

31 Downloading an app to a smartphone to book an appointment (you could then use the app to book  
32 other appointments at your surgery)

- 33 1 Very unlikely  
34 2 Quite unlikely  
35 3 Neither likely or unlikely  
36 4 Quite likely  
37 5 Very likely  
38

39  
40 Which of the following methods have you previously used to book an appointment at your GP  
41 practice? This could be an appointment for anything, with a GP or with a nurse.

42 Please select all that apply.

- 43 1 Booked in person (i.e. at the reception desk)  
44 2 Booked by phoning the GP practice  
45 3 Booked using a 24-hour automated telephone appointment-booking system  
46 4 Booked online on a website  
47 5 Booked by text-message  
48 6 Booked using a smartphone app  
49 7 Other  
50 8 Don't know - someone else has always booked my appointments  
51 9 I have never booked an appointment at my GP practice  
52  
53  
54  
55  
56  
57  
58  
59  
60

1  
2  
3 Do you have a mobile phone?

4 \*Description of smartphone provided if necessary; "A 'smart phone' is a mobile phone that performs  
5 many of the functions of a computer, typically having a touchscreen and Internet access"

- 6  
7 1 Yes, a smart phone  
8 2 Yes, but it is not a smart phone  
9 3 No, I do not have a mobile phone

10  
11  
12  
13  
14  
15  
16  
17  
18  
19  
20  
21  
22  
23  
24  
25  
26  
27  
28  
29  
30  
31  
32  
33  
34  
35  
36  
37  
38  
39  
40  
41  
42  
43  
44  
45  
46  
47  
48  
49  
50  
51  
52  
53  
54  
55  
56  
57  
58  
59  
60

For peer review only

**Online Supplement 2: Could changing invitation and booking processes help women translate their cervical screening intentions into action? A population-based survey of women’s preferences in Great Britain.**

(Mairead Ryan, Jo Waller and Laura Marlow)

*Survey inclusion flow diagram*

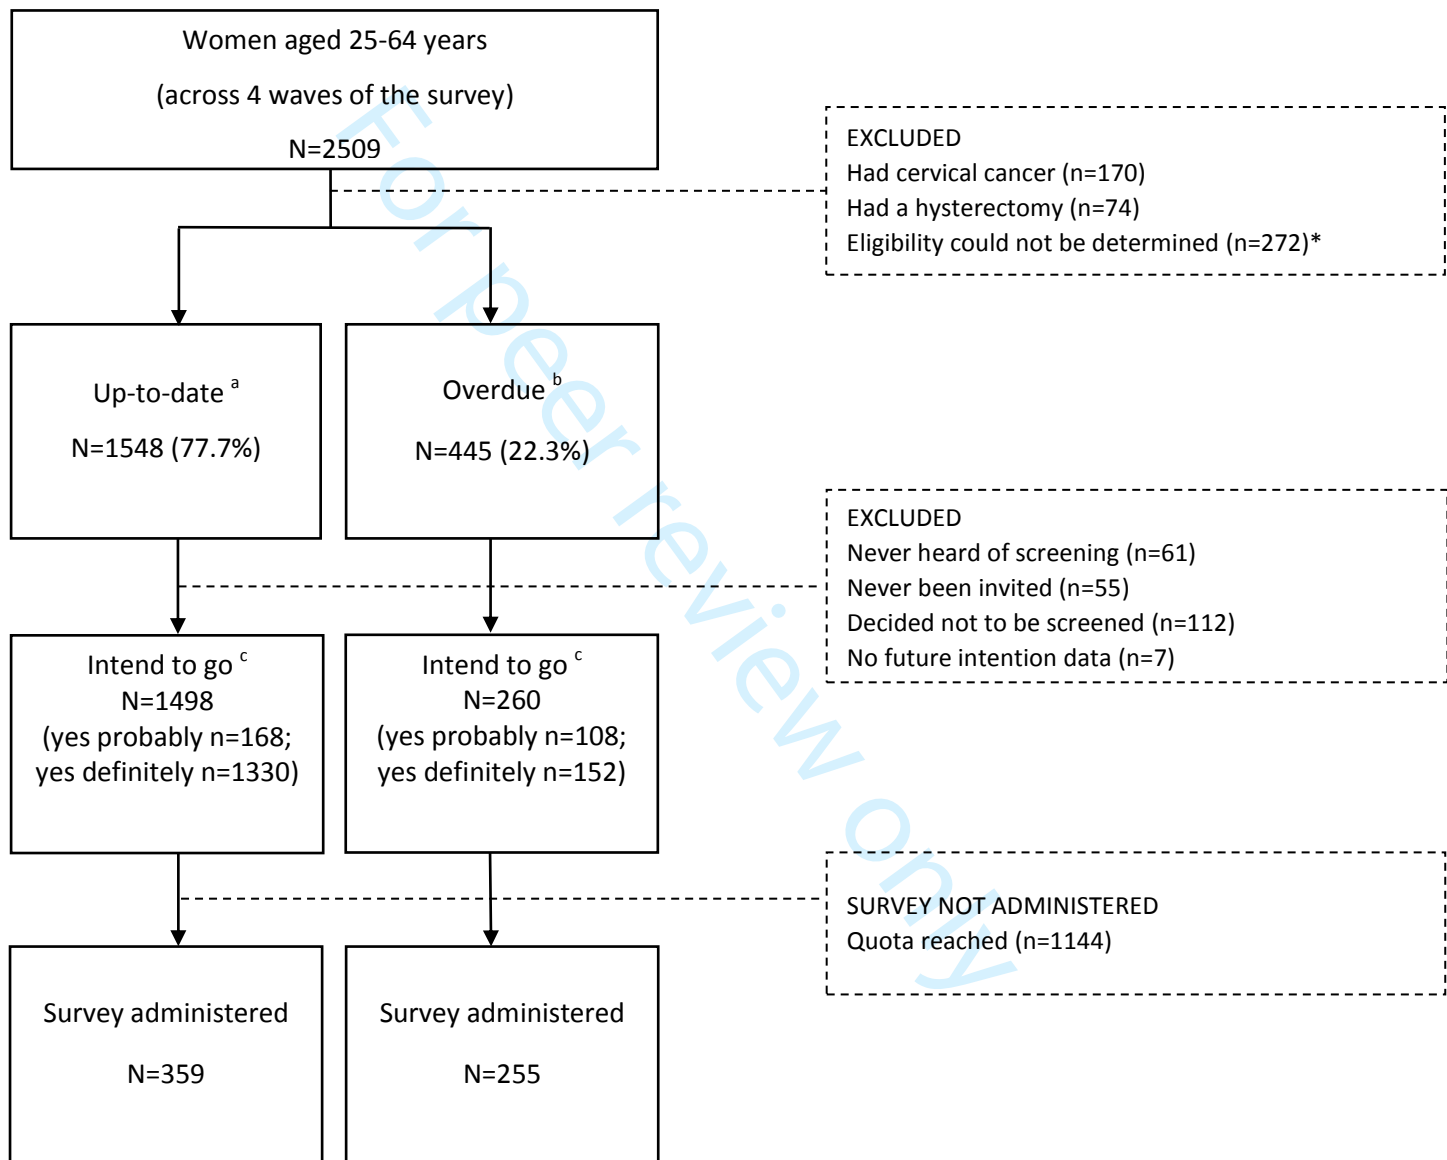

\*Women who refused to answer the hysterectomy question (n=177) or screening uptake question (n=95)

<sup>a</sup> Up-to-date: been screened within the last 3 years if 25-64 years or the last 5 years if 50-64 years

<sup>b</sup> Overdue: not been screened within the last 3 years if 25-64 years or the last 5 years if 50-64 years

<sup>c</sup> Responded that they would ‘probably’ or ‘definitely’ attend screening when next invited

### Online Supplement 3: Could changing invitation and booking processes help women translate their cervical screening intentions into action? A population-based survey of women's preferences in Great Britain.

(Mairead Ryan, Jo Waller and Laura Marlow)

Table S1:

*Descriptives for acceptability of cervical screening invitation modalities (n=614)*

|                     | <b>Very unacceptable/Quite unacceptable</b> | <b>Neither unacceptable or acceptable</b> | <b>Quite acceptable/Very acceptable</b> | <b>Don't know/ not applicable (Excluded)</b> |
|---------------------|---------------------------------------------|-------------------------------------------|-----------------------------------------|----------------------------------------------|
|                     | N (%)                                       | N (%)                                     | N (%)                                   | N (%)                                        |
| Posted letter       | 14 (2.3)                                    | 31 (5.0)                                  | 90.1 (90.1)                             | 16 (2.6)                                     |
| Text-message        | 65 (10.6)                                   | 50 (8.1)                                  | 482 (78.5)                              | 17 (2.8)                                     |
| Email               | 95 (15.5)                                   | 52 (8.5)                                  | 445 (72.5)                              | 22 (3.6)                                     |
| Mobile phone call   | 92 (15.0)                                   | 53 (8.6)                                  | 453 (73.8)                              | 16 (2.6)                                     |
| Landline phone call | 132 (21.5)                                  | 85 (13.8)                                 | 359 (58.5)                              | 38 (6.2)                                     |

Table S2:

*Descriptives for likelihood of using different phone-based and online booking methods (n=614)*

|                                                      | <b>Very unlikely/Quite unlikely</b> | <b>Neither unlikely or likely</b> | <b>Quite likely/Very likely</b> | <b>Don't know/ not applicable (Excluded)</b> |
|------------------------------------------------------|-------------------------------------|-----------------------------------|---------------------------------|----------------------------------------------|
|                                                      | N (%)                               | N (%)                             | N (%)                           | N (%)                                        |
| Calling the GP                                       | 21 (3.4)                            | 25 (4.1)                          | 550 (89.6)                      | 18 (2.9)                                     |
| Calling a 24-hour automated service                  | 182 (29.6)                          | 91 (14.8)                         | 317 (51.6)                      | 24 (3.9)                                     |
| Requesting a call-back                               | 164 (26.7)                          | 79 (12.9)                         | 350 (57.0)                      | 21 (3.4)                                     |
| Booking on a website using a desktop/laptop          | 172 (28.0)                          | 62 (10.1)                         | 355 (57.8)                      | 25 (4.1)                                     |
| Booking on a website using a smartphone <sup>a</sup> | 141 (26.5)                          | 44 (8.3)                          | 328 (61.5)                      | 20 (3.8)                                     |
| Downloading an app to your smartphone <sup>a</sup>   | 185 (34.7)                          | 56 (10.5)                         | 276 (51.8)                      | 16 (3.0)                                     |

<sup>a</sup> participants with no smartphone removed from analyses (n = 81)

Table S3

Multivariable logistic regression models of predictors of the acceptability of cervical screening invitation modalities

|                                | Posted letter<br>(n=597) | Text-message<br>(n=596) | Email<br>(n=591)   | Mobile phone call<br>(n=597) | Landline phone call<br>(n=575) |
|--------------------------------|--------------------------|-------------------------|--------------------|------------------------------|--------------------------------|
|                                | OR (95% CI)              | OR (95% CI)             | OR (95% CI)        | OR (95% CI)                  | OR (95% CI)                    |
| <b>Age group</b>               |                          |                         |                    |                              |                                |
| 25-34                          | 1.00                     | 1.00                    | 1.00               | 1.00                         | 1.00                           |
| 35-44                          | 0.71 (0.30-1.68)         | 0.79 (0.44-1.44)        | 0.73 (0.43-1.23)   | 0.86 (0.50-1.50)             | 1.16 (0.73-1.83)               |
| 45-54                          | 0.40 (0.17-0.92)*        | 0.60 (0.33-1.09)        | 0.70 (0.41-1.20)   | 0.49 (0.29-0.84)**           | 0.65 (0.41-1.05)               |
| 55-64                          | 1.06 (0.31-3.66)         | 0.28 (0.15-0.55)***     | 0.36 (0.19-0.66)** | 0.48 (0.26-0.87)*            | 0.93 (0.53-1.62)               |
| <b>Social grade</b>            |                          |                         |                    |                              |                                |
| AB                             | 1.00                     | 1.00                    | 1.00               | 1.00                         | 1.00                           |
| C1                             | 1.00 (0.42-2.36)         | 1.16 (0.63-2.11)        | 0.75 (0.41-1.38)   | 1.25 (0.74-2.11)             | 1.15 (0.71-1.88)               |
| C2                             | 3.47 (1.05-11.47)*       | 0.97 (0.53-1.77)        | 0.57 (0.31-1.03)   | 2.37 (1.32-4.23)**           | 1.84 (1.10-3.06)*              |
| D                              | 2.11 (0.63-7.04)         | 1.71 (0.80-3.65)        | 0.81 (0.40-1.62)   | 1.85 (0.97-3.51)             | 1.83 (1.02-3.27)*              |
| E                              | 0.57 (0.17-1.87)         | 0.84 (0.36-1.93)        | 0.30 (0.14-0.65)** | 2.69 (1.17-6.16)*            | 1.93 (0.94-3.97)               |
| <b>Employment</b>              |                          |                         |                    |                              |                                |
| Employed                       | 1.00                     | 1.00                    | 1.00               | 1.00                         | 1.00                           |
| Unemployed                     | 0.90 (0.35-2.30)         | 1.34 (0.73-2.44)        | 1.05 (0.62-1.80)   | 1.27 (0.73-2.23)             | 1.46 (0.90-2.37)               |
| Other (studying/retired)†      | -                        | -                       | -                  | -                            | -                              |
| <b>Ethnicity</b>               |                          |                         |                    |                              |                                |
| White                          | 1.00                     | 1.00                    | 1.00               | 1.00                         | 1.00                           |
| All other groups               | 0.39 (0.17-0.90)*        | 2.09 (0.86-5.08)        | 2.85 (1.24-6.57)*  | 1.34 (0.67-2.72)             | 1.31 (0.73-2.36)               |
| <b>Caring responsibilities</b> |                          |                         |                    |                              |                                |
| No                             | 1.00                     | 1.00                    | 1.00               | 1.00                         | 1.00                           |
| Yes                            | 1.50 (0.76-2.96)         | 0.95 (0.60-1.51)        | 1.10 (0.72-1.70)   | 1.52 (1.00-2.32)             | 1.14 (0.78-1.67)               |

Note. Reference group: 'unacceptable/ambivalent'. OR= adjusted odds ratio; CI= confidence interval; \*p<0.05, \*\*p<0.01, \*\*\*p<0.001; 'screening status' and 'practical barriers' variables not included because not significant in univariable analyses; †category not included due to insufficient cases

Table S4

Multivariable logistic regression models of predictors of phone-based booking preferences

|                                | Calling the GP<br>(n=596) | Calling a 24-hour<br>automated service<br>(n=590) | Requesting a call-back<br>(n=593) |
|--------------------------------|---------------------------|---------------------------------------------------|-----------------------------------|
|                                | OR (95% CI)               | OR (95% CI)                                       | OR (95% CI)                       |
| <b>Age group</b>               |                           |                                                   |                                   |
| 25-34                          | 1.00                      | 1.00                                              | 1.00                              |
| 35-44                          | 1.05 (0.47-2.36)          | 0.69 (0.45-1.06)                                  | 1.05 (0.68-1.63)                  |
| 45-54                          | 0.60 (0.27-1.35)          | 0.50 (0.31-0.79)**                                | 0.65 (0.41-1.02)                  |
| 55-64                          | 0.96 (0.34-2.75)          | 0.46 (0.27-0.78)**                                | 1.30 (0.76-2.22)                  |
| <b>Caring responsibilities</b> |                           |                                                   |                                   |
| No                             | 1.00                      | 1.00                                              | 1.00                              |
| Yes                            | 0.84 (0.43-1.67)          | 0.92 (0.64-1.33)                                  | 1.74 (1.20-2.52)**                |
| <b>Screening status</b>        |                           |                                                   |                                   |
| Intender                       | 1.00                      | 1.00                                              | 1.00                              |
| Maintainer                     | 1.31 (0.70-2.43)          | 0.94 (0.67-1.32)                                  | 0.63 (0.45-0.90)*                 |
| <b>Practical barriers</b>      |                           |                                                   |                                   |
| 0 barriers                     | 1.00                      | 1.00                                              | 1.00                              |
| 1 barrier                      | 1.00 (0.43-2.33)          | 0.83 (0.54-1.26)                                  | 0.73 (0.48-1.13)                  |
| 2 barriers                     | 1.05 (0.42-2.60)          | 1.24 (0.79 -1.96)                                 | 1.21 (0.76-1.93)                  |
| 3 or more barriers cited       | 0.35 (0.15-0.83)*         | 1.59 (0.91-2.78)                                  | 1.17 (0.67-2.07)                  |

Note. Reference group: 'not likely to use/ambivalent' OR= adjusted odds ratio; CI= confidence interval; \*p<0.05, \*\*p<0.01, \*\*\*p<0.001; 'social grade', 'employment' and 'ethnicity' not included because not significant in univariable analyses

Table S5

*Multivariable logistic regression models of predictors of online booking preferences*

|                           | Booking on a website<br>using a desktop/laptop<br>(n=589) | Booking on a website<br>using a smartphone <sup>a</sup><br>(n=513) | Downloading an app to<br>your smartphone <sup>a</sup><br>(n=517) |
|---------------------------|-----------------------------------------------------------|--------------------------------------------------------------------|------------------------------------------------------------------|
|                           | OR (95% CI)                                               | OR (95% CI)                                                        | OR (95% CI)                                                      |
| <b>Age group</b>          |                                                           |                                                                    |                                                                  |
| 25-34                     | 1.00                                                      | 1.00                                                               | 1.00                                                             |
| 35-44                     | 0.60 (0.38-0.95)*                                         | 0.59 (0.34-0.92)*                                                  | 0.52 (0.33-0.82)**                                               |
| 45-54                     | 0.52 (0.32-0.85)**                                        | 0.36 (0.21-0.61)***                                                | 0.35 (0.21-0.58)***                                              |
| 55-64                     | 0.32 (0.18-0.55)***                                       | 0.25 (0.13-0.47)***                                                | 0.23 (0.12-0.44)***                                              |
| <b>Social grade</b>       |                                                           |                                                                    |                                                                  |
| AB                        | 1.00                                                      | 1.00                                                               | 1.00                                                             |
| C1                        | 0.59 (0.35-0.99)*                                         | 0.67 (0.38-1.18)                                                   | 0.91 (0.54-1.54)                                                 |
| C2                        | 0.51 (0.30-0.87)*                                         | 0.47 (0.26-0.83)*                                                  | 0.82 (0.47-1.41)                                                 |
| D                         | 0.47 (0.26-0.86)*                                         | 0.39 (0.20-0.73)**                                                 | 0.62 (0.34-1.14)                                                 |
| E                         | 0.34 (0.17-0.68)**                                        | 0.41 (0.18-0.94)*                                                  | 0.76 (0.34-1.69)                                                 |
| <b>Employment</b>         |                                                           |                                                                    |                                                                  |
| Employed                  | 1.00                                                      | 1.00                                                               | 1.00                                                             |
| Unemployed                | 0.85 (0.54-1.35)                                          | 0.84 (0.50-1.41)                                                   | 0.79 (0.48-1.31)                                                 |
| Other (studying/retired)  | 0.91 (0.42-1.97)                                          | 0.55 (0.22-1.35)                                                   | 0.35 (0.13-0.91)*                                                |
| <b>Practical barriers</b> |                                                           |                                                                    |                                                                  |
| 0 barriers                | 1.00                                                      | 1.00                                                               | 1.00                                                             |
| 1 barrier                 | 1.35 (0.87-2.08)                                          | 1.18 (0.73-1.91)                                                   | 1.21 (0.75-1.93)                                                 |
| 2 barriers                | 1.67 (1.04-2.69)*                                         | 1.52 (0.90-2.54)                                                   | 1.66 (1.00-2.73)*                                                |
| 3 or more barriers        | 2.07 (1.15-3.73)*                                         | 2.74 (1.41-5.33)**                                                 | 2.46 (1.00-2.73)**                                               |

Note. Reference group: 'not likely to use/ambivalent' OR= adjusted odds ratio; CI= confidence interval; \*p<0.05, \*\*p<0.01, \*\*\*p<0.001; <sup>a</sup> participants with no smartphone removed from analyses (n = 81); 'ethnicity', 'caring responsibilities' and 'screening status' not included because not significant in univariable analyses

**Online Supplement 4: Could changing invitation and booking processes help women translate their cervical screening intentions into action? A population-based survey of women's preferences in Great Britain.**

(Mairead Ryan, Jo Waller and Laura Marlow)

*Open responses provided for citing invitation method as unacceptable*

| Invitation mode | Unacceptable (n) | Reasons for being unacceptable                                                                                                                                                                                                                                                                                                                                                                                                                                                                                             |
|-----------------|------------------|----------------------------------------------------------------------------------------------------------------------------------------------------------------------------------------------------------------------------------------------------------------------------------------------------------------------------------------------------------------------------------------------------------------------------------------------------------------------------------------------------------------------------|
| Posted letter   | 12               | Don't open post/might miss the letter/no time to read letter (n=4)<br>Receive letter too late (n=2)<br>Letter could be lost in the post (n=2)<br>Other (n=4) <ul style="list-style-type: none"> <li>• Would forget (n=1)</li> <li>• Environmental concerns (n=1)</li> <li>• Waste of time (n=1)</li> <li>• No reason provided (n=1)</li> </ul>                                                                                                                                                                             |
| Text-message    | 67               | Privacy concerns (n=21)<br>Easy to miss it/may not read message (n=9)<br>Reason not provided (i.e. N/A) (n=9)<br>Doesn't have or use mobile (n=7)<br>Impersonal (n=6)<br>Could change number (n=4)<br>Prefer a letter/phone call (n=4)<br>Not reliable source/unprofessional (n=3)<br>Would forget/not act on it (n=2)<br>Other (n=2) <ul style="list-style-type: none"> <li>• Don't know (n=1)</li> <li>• They can text me but I don't want to text them (n=1)</li> </ul>                                                 |
| Email           | 94               | Would be lost in other emails/would not be seen (n=38)<br>No email/doesn't use email/no internet/no computer (n=17)<br>Privacy concerns (n=12)<br>Reason not provided (i.e. N/A) (n=12)<br>Prefer phone or letter (n=5)<br>Would forget/not act on it (n=2)<br>Impersonal/rude (n=2)<br>Other (n=6) <ul style="list-style-type: none"> <li>• Not timely (n=1)</li> <li>• Intrusive (n=1)</li> <li>• Not normal (n=1)</li> <li>• No reason (n=1)</li> <li>• Not keen (n=1)</li> <li>• Doesn't trust source (n=1)</li> </ul> |
| Mobile          | 90               | Would not be able to pick up/would miss call (n=33)                                                                                                                                                                                                                                                                                                                                                                                                                                                                        |



|                     |     |                                                                                                                                                                                                                                                                                                                                                                                                                                                                                                                                                                                      |
|---------------------|-----|--------------------------------------------------------------------------------------------------------------------------------------------------------------------------------------------------------------------------------------------------------------------------------------------------------------------------------------------------------------------------------------------------------------------------------------------------------------------------------------------------------------------------------------------------------------------------------------|
| phone call          |     | <p>Privacy concerns (n=22)</p> <p>Would prefer in writing/a letter (n=10)</p> <p>Reason not provided (i.e. N/A) (n=8)</p> <p>Would not know number – so would not answer call (n=5)</p> <p>No mobile (n=2)</p> <p>Would forget (n=2)</p> <p>Too many phone calls (n=2)</p> <p>Other (n=6)</p> <ul style="list-style-type: none"> <li>• Don't like idea (n=1)</li> <li>• Talking takes too much time (n=1)</li> <li>• Need time to think (n=1)</li> <li>• Impersonal (n=1)</li> <li>• People change phone number (n=1)</li> <li>• Don't like calls (n=1)</li> </ul>                   |
| Landline phone call | 129 | <p>No landline (n=39)</p> <p>Would miss call/out of the house during the day (n=31)</p> <p>Privacy concerns (n=24)</p> <p>No reason provided (i.e. N/A) (n=12)</p> <p>Feels intrusive (n=5)</p> <p>Prefer in writing/letter (n=5)</p> <p>Don't want phone call (n=4)</p> <p>Not reliable source (n=3)</p> <p>Other (n=6)</p> <ul style="list-style-type: none"> <li>• Impersonal (n=1)</li> <li>• "Better with working" (n=1)</li> <li>• Unnecessary (n=1)</li> <li>• Unknown number (n=1)</li> <li>• Want time to think (n=1)</li> <li>• Doesn't matter either way (n=1)</li> </ul> |

**STROBE 2007 (v4) Statement—Checklist of items that should be included in reports of *cross-sectional studies***

| Section/Topic                | Item # | Recommendation                                                                                                                                                                       | Reported on page # |
|------------------------------|--------|--------------------------------------------------------------------------------------------------------------------------------------------------------------------------------------|--------------------|
| <b>Title and abstract</b>    | 1      | (a) Indicate the study’s design with a commonly used term in the title or the abstract                                                                                               | 2                  |
|                              |        | (b) Provide in the abstract an informative and balanced summary of what was done and what was found                                                                                  | 2                  |
| <b>Introduction</b>          |        |                                                                                                                                                                                      |                    |
| Background/rationale         | 2      | Explain the scientific background and rationale for the investigation being reported                                                                                                 | 3-4                |
| Objectives                   | 3      | State specific objectives, including any prespecified hypotheses                                                                                                                     | 4                  |
| <b>Methods</b>               |        |                                                                                                                                                                                      |                    |
| Study design                 | 4      | Present key elements of study design early in the paper                                                                                                                              | 4                  |
| Setting                      | 5      | Describe the setting, locations, and relevant dates, including periods of recruitment, exposure, follow-up, and data collection                                                      | 4                  |
| Participants                 | 6      | (a) Give the eligibility criteria, and the sources and methods of selection of participants                                                                                          | 4-5                |
| Variables                    | 7      | Clearly define all outcomes, exposures, predictors, potential confounders, and effect modifiers. Give diagnostic criteria, if applicable                                             | 5-6                |
| Data sources/<br>measurement | 8*     | For each variable of interest, give sources of data and details of methods of assessment (measurement). Describe comparability of assessment methods if there is more than one group | 5-6                |
| Bias                         | 9      | Describe any efforts to address potential sources of bias                                                                                                                            | 4                  |
| Study size                   | 10     | Explain how the study size was arrived at                                                                                                                                            | 5                  |
| Quantitative variables       | 11     | Explain how quantitative variables were handled in the analyses. If applicable, describe which groupings were chosen and why                                                         | 6                  |
| Statistical methods          | 12     | (a) Describe all statistical methods, including those used to control for confounding                                                                                                | 6                  |
|                              |        | (b) Describe any methods used to examine subgroups and interactions                                                                                                                  | 6                  |
|                              |        | (c) Explain how missing data were addressed                                                                                                                                          |                    |
|                              |        | (d) If applicable, describe analytical methods taking account of sampling strategy                                                                                                   |                    |
|                              |        | (e) Describe any sensitivity analyses                                                                                                                                                |                    |
| <b>Results</b>               |        |                                                                                                                                                                                      |                    |

|                          |     |                                                                                                                                                                                                              |            |
|--------------------------|-----|--------------------------------------------------------------------------------------------------------------------------------------------------------------------------------------------------------------|------------|
| Participants             | 13* | (a) Report numbers of individuals at each stage of study—eg numbers potentially eligible, examined for eligibility, confirmed eligible, included in the study, completing follow-up, and analysed            | 6          |
|                          |     | (b) Give reasons for non-participation at each stage                                                                                                                                                         | n/a        |
|                          |     | (c) Consider use of a flow diagram                                                                                                                                                                           |            |
| Descriptive data         | 14* | (a) Give characteristics of study participants (eg demographic, clinical, social) and information on exposures and potential confounders                                                                     | 6-7        |
|                          |     | (b) Indicate number of participants with missing data for each variable of interest                                                                                                                          |            |
| Outcome data             | 15* | Report numbers of outcome events or summary measures                                                                                                                                                         |            |
| Main results             | 16  | (a) Give unadjusted estimates and, if applicable, confounder-adjusted estimates and their precision (eg, 95% confidence interval). Make clear which confounders were adjusted for and why they were included | 7-8, 12-15 |
|                          |     | (b) Report category boundaries when continuous variables were categorized                                                                                                                                    | 5-6        |
|                          |     | (c) If relevant, consider translating estimates of relative risk into absolute risk for a meaningful time period                                                                                             | n/a        |
| Other analyses           | 17  | Report other analyses done—eg analyses of subgroups and interactions, and sensitivity analyses                                                                                                               |            |
| <b>Discussion</b>        |     |                                                                                                                                                                                                              |            |
| Key results              | 18  | Summarise key results with reference to study objectives                                                                                                                                                     | 8-10       |
| Limitations              | 19  | Discuss limitations of the study, taking into account sources of potential bias or imprecision. Discuss both direction and magnitude of any potential bias                                                   | 9-10       |
| Interpretation           | 20  | Give a cautious overall interpretation of results considering objectives, limitations, multiplicity of analyses, results from similar studies, and other relevant evidence                                   | 10         |
| Generalisability         | 21  | Discuss the generalisability (external validity) of the study results                                                                                                                                        | 9-10       |
| <b>Other information</b> |     |                                                                                                                                                                                                              |            |
| Funding                  | 22  | Give the source of funding and the role of the funders for the present study and, if applicable, for the original study on which the present article is based                                                | 1          |

\*Give information separately for cases and controls in case-control studies and, if applicable, for exposed and unexposed groups in cohort and cross-sectional studies.

**Note:** An Explanation and Elaboration article discusses each checklist item and gives methodological background and published examples of transparent reporting. The STROBE checklist is best used in conjunction with this article (freely available on the Web sites of PLoS Medicine at <http://www.plosmedicine.org/>, Annals of Internal Medicine at <http://www.annals.org/>, and Epidemiology at <http://www.epidem.com/>). Information on the STROBE Initiative is available at [www.strobe-statement.org](http://www.strobe-statement.org).
