# Supplementary material for: Could changing invitation and booking processes help women translate their cervical screening intentions into action? A population-based survey of women’s preferences in Great Britain
Source: PubMed Central journal article supplement (PMC6629419; doi:10.1136/bmjopen-2018-028134), 2019-07-11
Supplement: bmjopen-2018-028134supp002.pdf [file bmjopen-2018-028134supp002.pdf]

**Online Supplement 2: Could changing invitation and booking processes help women translate their cervical screening intentions into action? A population-based survey of women's preferences in Great Britain.**

(Mairead Ryan, Jo Waller and Laura Marlow)

Table S1:

*Descriptives for acceptability of cervical screening invitation modalities (n=614)*

|                     | <b>Very unacceptable/Quite unacceptable</b> | <b>Neither unacceptable or acceptable</b> | <b>Quite acceptable/Very acceptable</b> | <b>Don't know/ not applicable (Excluded)</b> |
|---------------------|---------------------------------------------|-------------------------------------------|-----------------------------------------|----------------------------------------------|
|                     | N (%)                                       | N (%)                                     | N (%)                                   | N (%)                                        |
| Posted letter       | 14 (2.3)                                    | 31 (5.0)                                  | 90.1 (90.1)                             | 16 (2.6)                                     |
| Text-message        | 65 (10.6)                                   | 50 (8.1)                                  | 482 (78.5)                              | 17 (2.8)                                     |
| Email               | 95 (15.5)                                   | 52 (8.5)                                  | 445 (72.5)                              | 22 (3.6)                                     |
| Mobile phone call   | 92 (15.0)                                   | 53 (8.6)                                  | 453 (73.8)                              | 16 (2.6)                                     |
| Landline phone call | 132 (21.5)                                  | 85 (13.8)                                 | 359 (58.5)                              | 38 (6.2)                                     |

Table S2:

*Descriptives for likelihood of using different phone-based and online booking methods (n=614)*

|                                                      | <b>Very unlikely/Quite unlikely</b> | <b>Neither unlikely or likely</b> | <b>Quite likely/Very likely</b> | <b>Don't know/ not applicable (Excluded)</b> |
|------------------------------------------------------|-------------------------------------|-----------------------------------|---------------------------------|----------------------------------------------|
|                                                      | N (%)                               | N (%)                             | N (%)                           | N (%)                                        |
| Calling the GP                                       | 21 (3.4)                            | 25 (4.1)                          | 550 (89.6)                      | 18 (2.9)                                     |
| Calling a 24-hour automated service                  | 182 (29.6)                          | 91 (14.8)                         | 317 (51.6)                      | 24 (3.9)                                     |
| Requesting a call-back                               | 164 (26.7)                          | 79 (12.9)                         | 350 (57.0)                      | 21 (3.4)                                     |
| Booking on a website using a desktop/laptop          | 172 (28.0)                          | 62 (10.1)                         | 355 (57.8)                      | 25 (4.1)                                     |
| Booking on a website using a smartphone <sup>a</sup> | 141 (26.5)                          | 44 (8.3)                          | 328 (61.5)                      | 20 (3.8)                                     |
| Downloading an app to your smartphone <sup>a</sup>   | 185 (34.7)                          | 56 (10.5)                         | 276 (51.8)                      | 16 (3.0)                                     |

<sup>a</sup> participants with no smartphone removed from analyses (n = 81)

Table S3

Multivariable logistic regression models of predictors of the acceptability of cervical screening invitation modalities

|                                | Posted letter<br>(n=597) | Text-message<br>(n=596) | Email<br>(n=591)   | Mobile phone call<br>(n=597) | Landline phone call<br>(n=575) |
|--------------------------------|--------------------------|-------------------------|--------------------|------------------------------|--------------------------------|
|                                | OR (95% CI)              | OR (95% CI)             | OR (95% CI)        | OR (95% CI)                  | OR (95% CI)                    |
| <b>Age group</b>               |                          |                         |                    |                              |                                |
| 25-34                          | 1.00                     | 1.00                    | 1.00               | 1.00                         | 1.00                           |
| 35-44                          | 0.71 (0.30-1.68)         | 0.79 (0.44-1.44)        | 0.73 (0.43-1.23)   | 0.86 (0.50-1.50)             | 1.16 (0.73-1.83)               |
| 45-54                          | 0.40 (0.17-0.92)*        | 0.60 (0.33-1.09)        | 0.70 (0.41-1.20)   | 0.49 (0.29-0.84)**           | 0.65 (0.41-1.05)               |
| 55-64                          | 1.06 (0.31-3.66)         | 0.28 (0.15-0.55)***     | 0.36 (0.19-0.66)** | 0.48 (0.26-0.87)*            | 0.93 (0.53-1.62)               |
| <b>Social grade</b>            |                          |                         |                    |                              |                                |
| AB                             | 1.00                     | 1.00                    | 1.00               | 1.00                         | 1.00                           |
| C1                             | 1.00 (0.42-2.36)         | 1.16 (0.63-2.11)        | 0.75 (0.41-1.38)   | 1.25 (0.74-2.11)             | 1.15 (0.71-1.88)               |
| C2                             | 3.47 (1.05-11.47)*       | 0.97 (0.53-1.77)        | 0.57 (0.31-1.03)   | 2.37 (1.32-4.23)**           | 1.84 (1.10-3.06)*              |
| D                              | 2.11 (0.63-7.04)         | 1.71 (0.80-3.65)        | 0.81 (0.40-1.62)   | 1.85 (0.97-3.51)             | 1.83 (1.02-3.27)*              |
| E                              | 0.57 (0.17-1.87)         | 0.84 (0.36-1.93)        | 0.30 (0.14-0.65)** | 2.69 (1.17-6.16)*            | 1.93 (0.94-3.97)               |
| <b>Employment</b>              |                          |                         |                    |                              |                                |
| Employed                       | 1.00                     | 1.00                    | 1.00               | 1.00                         | 1.00                           |
| Unemployed                     | 0.90 (0.35-2.30)         | 1.34 (0.73-2.44)        | 1.05 (0.62-1.80)   | 1.27 (0.73-2.23)             | 1.46 (0.90-2.37)               |
| Other (studying/retired)†      | -                        | -                       | -                  | -                            | -                              |
| <b>Ethnicity</b>               |                          |                         |                    |                              |                                |
| White                          | 1.00                     | 1.00                    | 1.00               | 1.00                         | 1.00                           |
| All other groups               | 0.39 (0.17-0.90)*        | 2.09 (0.86-5.08)        | 2.85 (1.24-6.57)*  | 1.34 (0.67-2.72)             | 1.31 (0.73-2.36)               |
| <b>Caring responsibilities</b> |                          |                         |                    |                              |                                |
| No                             | 1.00                     | 1.00                    | 1.00               | 1.00                         | 1.00                           |
| Yes                            | 1.50 (0.76-2.96)         | 0.95 (0.60-1.51)        | 1.10 (0.72-1.70)   | 1.52 (1.00-2.32)             | 1.14 (0.78-1.67)               |

Note. Reference group: 'unacceptable/ambivalent'. OR= adjusted odds ratio; CI= confidence interval; \*p<0.05, \*\*p<0.01, \*\*\*p<0.001; 'screening status' and 'practical barriers' variables not included because not significant in univariable analyses; †category not included due to insufficient cases

Table S4

Multivariable logistic regression models of predictors of phone-based booking preferences

|                                | Calling the GP<br>(n=596) | Calling a 24-hour<br>automated service<br>(n=590) | Requesting a call-back<br>(n=593) |
|--------------------------------|---------------------------|---------------------------------------------------|-----------------------------------|
|                                | OR (95% CI)               | OR (95% CI)                                       | OR (95% CI)                       |
| <b>Age group</b>               |                           |                                                   |                                   |
| 25-34                          | 1.00                      | 1.00                                              | 1.00                              |
| 35-44                          | 1.05 (0.47-2.36)          | 0.69 (0.45-1.06)                                  | 1.05 (0.68-1.63)                  |
| 45-54                          | 0.60 (0.27-1.35)          | 0.50 (0.31-0.79)**                                | 0.65 (0.41-1.02)                  |
| 55-64                          | 0.96 (0.34-2.75)          | 0.46 (0.27-0.78)**                                | 1.30 (0.76-2.22)                  |
| <b>Caring responsibilities</b> |                           |                                                   |                                   |
| No                             | 1.00                      | 1.00                                              | 1.00                              |
| Yes                            | 0.84 (0.43-1.67)          | 0.92 (0.64-1.33)                                  | 1.74 (1.20-2.52)**                |
| <b>Screening status</b>        |                           |                                                   |                                   |
| Intender                       | 1.00                      | 1.00                                              | 1.00                              |
| Maintainer                     | 1.31 (0.70-2.43)          | 0.94 (0.67-1.32)                                  | 0.63 (0.45-0.90)*                 |
| <b>Practical barriers</b>      |                           |                                                   |                                   |
| 0 barriers                     | 1.00                      | 1.00                                              | 1.00                              |
| 1 barrier                      | 1.00 (0.43-2.33)          | 0.83 (0.54-1.26)                                  | 0.73 (0.48-1.13)                  |
| 2 barriers                     | 1.05 (0.42-2.60)          | 1.24 (0.79-1.96)                                  | 1.21 (0.76-1.93)                  |
| 3 or more barriers cited       | 0.35 (0.15-0.83)*         | 1.59 (0.91-2.78)                                  | 1.17 (0.67-2.07)                  |

Note. Reference group: 'not likely to use/ambivalent' OR= adjusted odds ratio; CI= confidence interval; \*p<0.05, \*\*p<0.01, \*\*\*p<0.001; 'social grade', 'employment' and 'ethnicity' not included because not significant in univariable analyses

Table S5

*Multivariable logistic regression models of predictors of online booking preferences*

|                           | Booking on a website<br>using a desktop/laptop<br>(n=589) | Booking on a website<br>using a smartphone <sup>a</sup><br>(n=513) | Downloading an app to<br>your smartphone <sup>a</sup><br>(n=517) |
|---------------------------|-----------------------------------------------------------|--------------------------------------------------------------------|------------------------------------------------------------------|
|                           | OR (95% CI)                                               | OR (95% CI)                                                        | OR (95% CI)                                                      |
| <b>Age group</b>          |                                                           |                                                                    |                                                                  |
| 25-34                     | 1.00                                                      | 1.00                                                               | 1.00                                                             |
| 35-44                     | 0.60 (0.38-0.95)*                                         | 0.59 (0.34-0.92)*                                                  | 0.52 (0.33-0.82)**                                               |
| 45-54                     | 0.52 (0.32-0.85)**                                        | 0.36 (0.21-0.61)***                                                | 0.35 (0.21-0.58)***                                              |
| 55-64                     | 0.32 (0.18-0.55)***                                       | 0.25 (0.13-0.47)***                                                | 0.23 (0.12-0.44)***                                              |
| <b>Social grade</b>       |                                                           |                                                                    |                                                                  |
| AB                        | 1.00                                                      | 1.00                                                               | 1.00                                                             |
| C1                        | 0.59 (0.35-0.99)*                                         | 0.67 (0.38-1.18)                                                   | 0.91 (0.54-1.54)                                                 |
| C2                        | 0.51 (0.30-0.87)*                                         | 0.47 (0.26-0.83)*                                                  | 0.82 (0.47-1.41)                                                 |
| D                         | 0.47 (0.26-0.86)*                                         | 0.39 (0.20-0.73)**                                                 | 0.62 (0.34-1.14)                                                 |
| E                         | 0.34 (0.17-0.68)**                                        | 0.41 (0.18-0.94)*                                                  | 0.76 (0.34-1.69)                                                 |
| <b>Employment</b>         |                                                           |                                                                    |                                                                  |
| Employed                  | 1.00                                                      | 1.00                                                               | 1.00                                                             |
| Unemployed                | 0.85 (0.54-1.35)                                          | 0.84 (0.50-1.41)                                                   | 0.79 (0.48-1.31)                                                 |
| Other (studying/retired)  | 0.91 (0.42-1.97)                                          | 0.55 (0.22-1.35)                                                   | 0.35 (0.13-0.91)*                                                |
| <b>Practical barriers</b> |                                                           |                                                                    |                                                                  |
| 0 barriers                | 1.00                                                      | 1.00                                                               | 1.00                                                             |
| 1 barrier                 | 1.35 (0.87-2.08)                                          | 1.18 (0.73-1.91)                                                   | 1.21 (0.75-1.93)                                                 |
| 2 barriers                | 1.67 (1.04-2.69)*                                         | 1.52 (0.90-2.54)                                                   | 1.66 (1.00-2.73)*                                                |
| 3 or more barriers        | 2.07 (1.15-3.73)*                                         | 2.74 (1.41-5.33)**                                                 | 2.46 (1.00-2.73)**                                               |

Note. Reference group: 'not likely to use/ambivalent' OR= adjusted odds ratio; CI= confidence interval; \*p<0.05, \*\*p<0.01, \*\*\*p<0.001; <sup>a</sup> participants with no smartphone removed from analyses (n = 81); 'ethnicity', 'caring responsibilities' and 'screening status' not included because not significant in univariable analyses
