# Supplementary material for: Could changing invitation and booking processes help women translate their cervical screening intentions into action? A population-based survey of women’s preferences in Great Britain
Source: PubMed Central journal article supplement (PMC6629419; doi:10.1136/bmjopen-2018-028134), 2019-07-11
Supplement: bmjopen-2018-028134supp003.pdf [file bmjopen-2018-028134supp003.pdf]

**Online Supplement 3: Could changing invitation and booking processes help women translate their cervical screening intentions into action? A population-based survey of women’s preferences in Great Britain.**

(Mairead Ryan, Jo Waller and Laura Marlow)

*Survey inclusion flow diagram*

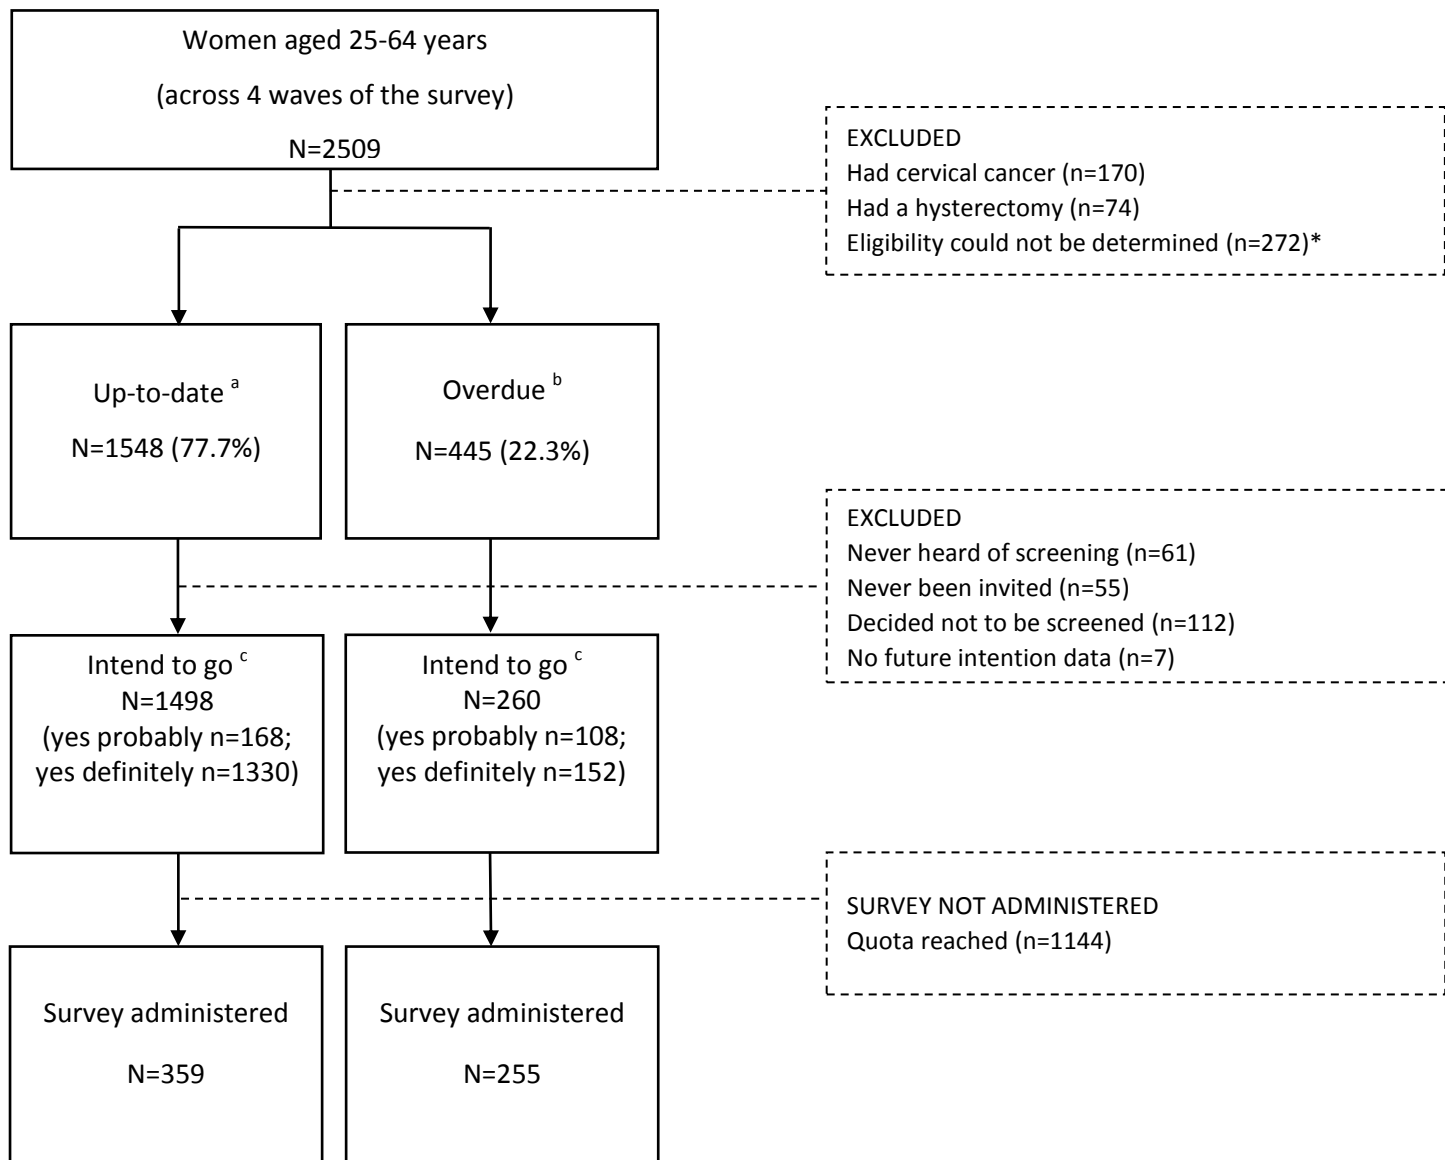

\*Women who refused to answer the hysterectomy question (n=177) or screening uptake question (n=95)

<sup>a</sup> Up-to-date: been screened within the last 3 years if 25-64 years or the last 5 years if 50-64 years

<sup>b</sup> Overdue: not been screened within the last 3 years if 25-64 years or the last 5 years if 50-64 years

<sup>c</sup> Responded that they would ‘probably’ or ‘definitely’ attend screening when next invited
